# Supplementary material for: New dimeric and trimeric Erythrina alkaloids from Erythrina variegata
Source: Royal Society of Chemistry journal article supplement (doi:10.1039/c6ra20530e), 2016-01-01

## Supporting Information of

New Dimeric and Trimeric *Erythrina* Alkaloids from *Erythrina variegata*

Bing-Jie Zhang<sup>a,b</sup>, Bin Wu<sup>a</sup>, Mei-Fen Bao<sup>a</sup>, Ling Ni<sup>a,b</sup>, Xiang-Hai Cai<sup>\*,a</sup>

### Affiliation

<sup>a</sup> State Key Laboratory of Phytochemistry and Plant Resources in West China,  
Kunming Institute of Botany, Chinese Academy of Sciences, Kunming 650201,  
People's Republic of China

<sup>b</sup> University of Chinese Academy of Sciences, Beijing 100039, People's Republic of  
China

### Correspondence

Prof. Dr. Xiang-Hai Cai, State Key Laboratory of Phytochemistry and Plant Resources in West China, Kunming Institute of Botany, Chinese Academy of Sciences, Lanhei Road 132, Kunming 650201, China. E-mail: xhcai@mail.kib.ac.cn. Phone: +86 871 65223242; Fax: +86 871 65223188

## Contents

|                                                                                                       |     |
|-------------------------------------------------------------------------------------------------------|-----|
| 1、 Structures of erythrivarines C–G (1-5) and their units, erythrinine (6) and 8-oxo-erythrinine (7). |     |
| 2、 NMR spectroscopic data of dimeric erythrivarines C-D (1-2)                                         |     |
| Figure S1: <sup>1</sup> H NMR spectrum of erythrivarine C (1)                                         | P04 |
| Figure S2: <sup>13</sup> C NMR spectrum of erythrivarine C (1)                                        | P06 |
| Figure S3: HSQC spectrum of erythrivarine C (1)                                                       | P07 |
| Figure S4: HMBC spectrum of erythrivarine C (1)                                                       | P09 |
| Figure S5: <sup>1</sup> H- <sup>1</sup> H COSY spectrum of erythrivarine C (1)                        | P10 |
| Figure S6: ROESY spectrum of erythrivarine C (1)                                                      | P11 |
| Figure S7: <sup>1</sup> H NMR spectrum of erythrivarine D (2)                                         | P12 |
| Figure S8: <sup>13</sup> C NMR spectrum of erythrivarine D (2)                                        | P13 |
| Figure S9: HSQC spectrum of erythrivarine D (2)                                                       | P14 |
| Figure S10: HMBC spectrum of erythrivarine D (2)                                                      | P15 |
| Figure S11: <sup>1</sup> H- <sup>1</sup> H COSY spectrum of erythrivarine D (2)                       | P16 |
| Figure S12: ROESY spectrum of erythrivarine D (2)                                                     | P17 |
| 3、 NMR spectroscopic data of trimeric erythrivarines F-G (3-5)                                        |     |
| Figure S13: <sup>1</sup> H NMR spectrum of erythrivarine E (3)                                        | P18 |
| Figure S14: <sup>13</sup> C NMR spectrum of erythrivarine E (3)                                       | P20 |
| Figure S15: HSQC spectrum of erythrivarine E (3)                                                      | P21 |
| Figure S16: HMBC spectrum of erythrivarine E (3)                                                      | P23 |
| Figure S17: ROESY spectrum of erythrivarine E (3)                                                     | P24 |
| Figure S18: <sup>1</sup> H NMR spectrum of erythrivarine F (4)                                        | P25 |
| Figure S19: <sup>13</sup> C NMR spectrum of erythrivarine F (4)                                       | P27 |
| Figure S20: HSQC spectrum of erythrivarine F (4)                                                      | P28 |
| Figure S21: HMBC spectrum of erythrivarine F (4)                                                      | P30 |
| Figure S22: <sup>1</sup> H- <sup>1</sup> H COSY spectrum of erythrivarine F (4)                       | P31 |
| Figure S23: ROESY spectrum of erythrivarine F (4)                                                     | P32 |
| Figure S24: <sup>1</sup> H NMR spectrum of erythrivarine G (5)                                        | P33 |
| Figure S25: <sup>13</sup> C NMR spectrum of erythrivarine G (5)                                       | P35 |
| Figure S26: HSQC spectrum of erythrivarine G (5)                                                      | P36 |
| Figure S27: HMBC spectrum of erythrivarine G (5)                                                      | P38 |
| Figure S28: <sup>1</sup> H- <sup>1</sup> H COSY spectrum of erythrivarine G (5)                       | P39 |
| Figure S29: ROESY spectrum of erythrivarine G (5)                                                     | P40 |
| 4、 NMR spectroscopic data of erythrinine (6) and 8-oxo-erythrinine (7)                                |     |
| Figure S30: <sup>1</sup> H NMR spectrum of 8-oxo-erythrinine (6)                                      | P41 |
| Figure S31: <sup>13</sup> C NMR spectrum of 8-oxo-erythrinine (6)                                     | P42 |
| Figure S32: <sup>1</sup> H NMR spectrum of 8-oxo-erythrinine (7)                                      | P43 |
| Figure S33: <sup>13</sup> C NMR spectrum of 8-oxo-erythrinine (7)                                     | P44 |
| 5、 UPLC-MS-MS chromatograms of 1-5                                                                    |     |
| Figure S34. The characteristic peak obtained by UPLC-MS-MS of erythrivarine C (1)                     | P46 |
| Figure S35. The characteristic peak obtained by UPLC-MS-MS of erythrivarine D (2)                     | P48 |
| Figure S36. The characteristic peak obtained by UPLC-MS-MS of erythrivarine E (3)                     | P50 |
| Figure S37. The characteristic peak obtained by UPLC-MS-MS of erythrivarine F (4)                     | P52 |
| Figure S38. The characteristic peak obtained by UPLC-MS-MS of erythrivarine G (5)                     | P54 |
| 6、 The CD and UV chromatography of the unit of erythrivarine C (1)                                    |     |

1、 Structures of erythrivarines C–G (1-5) and their units, erythrinine (6) and 8-oxo-erythrinine (7).

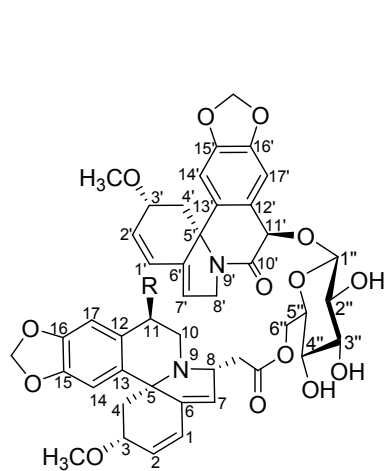

- 1 R=OH  
2 R=OCH<sub>3</sub>

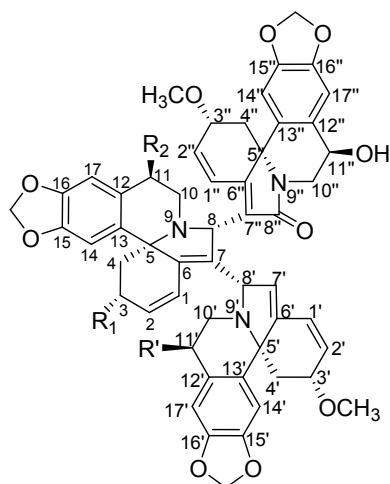

- 3 R<sub>1</sub>=OCH<sub>3</sub> R<sub>2</sub>=OH R'=OH  
4 R<sub>1</sub>=OCH<sub>3</sub> R<sub>2</sub>=OCH<sub>3</sub> R'=OH  
5 R<sub>1</sub>=O R<sub>2</sub>=OH R'=OCH<sub>3</sub>

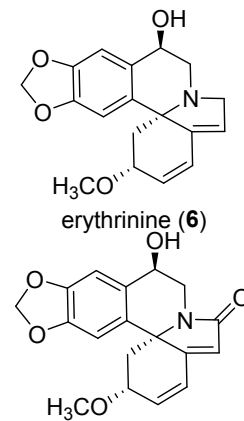

erythrinine (6)

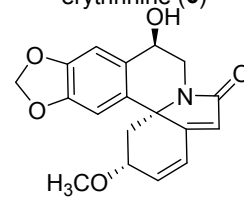

8-oxo-erythrinine (7)

## 2、NMR spectroscopic data of dimeric erythrivarines C-D (1-2)

**Figure S1.**  $^1\text{H}$  NMR spectrum of Erythrivarine C (1)

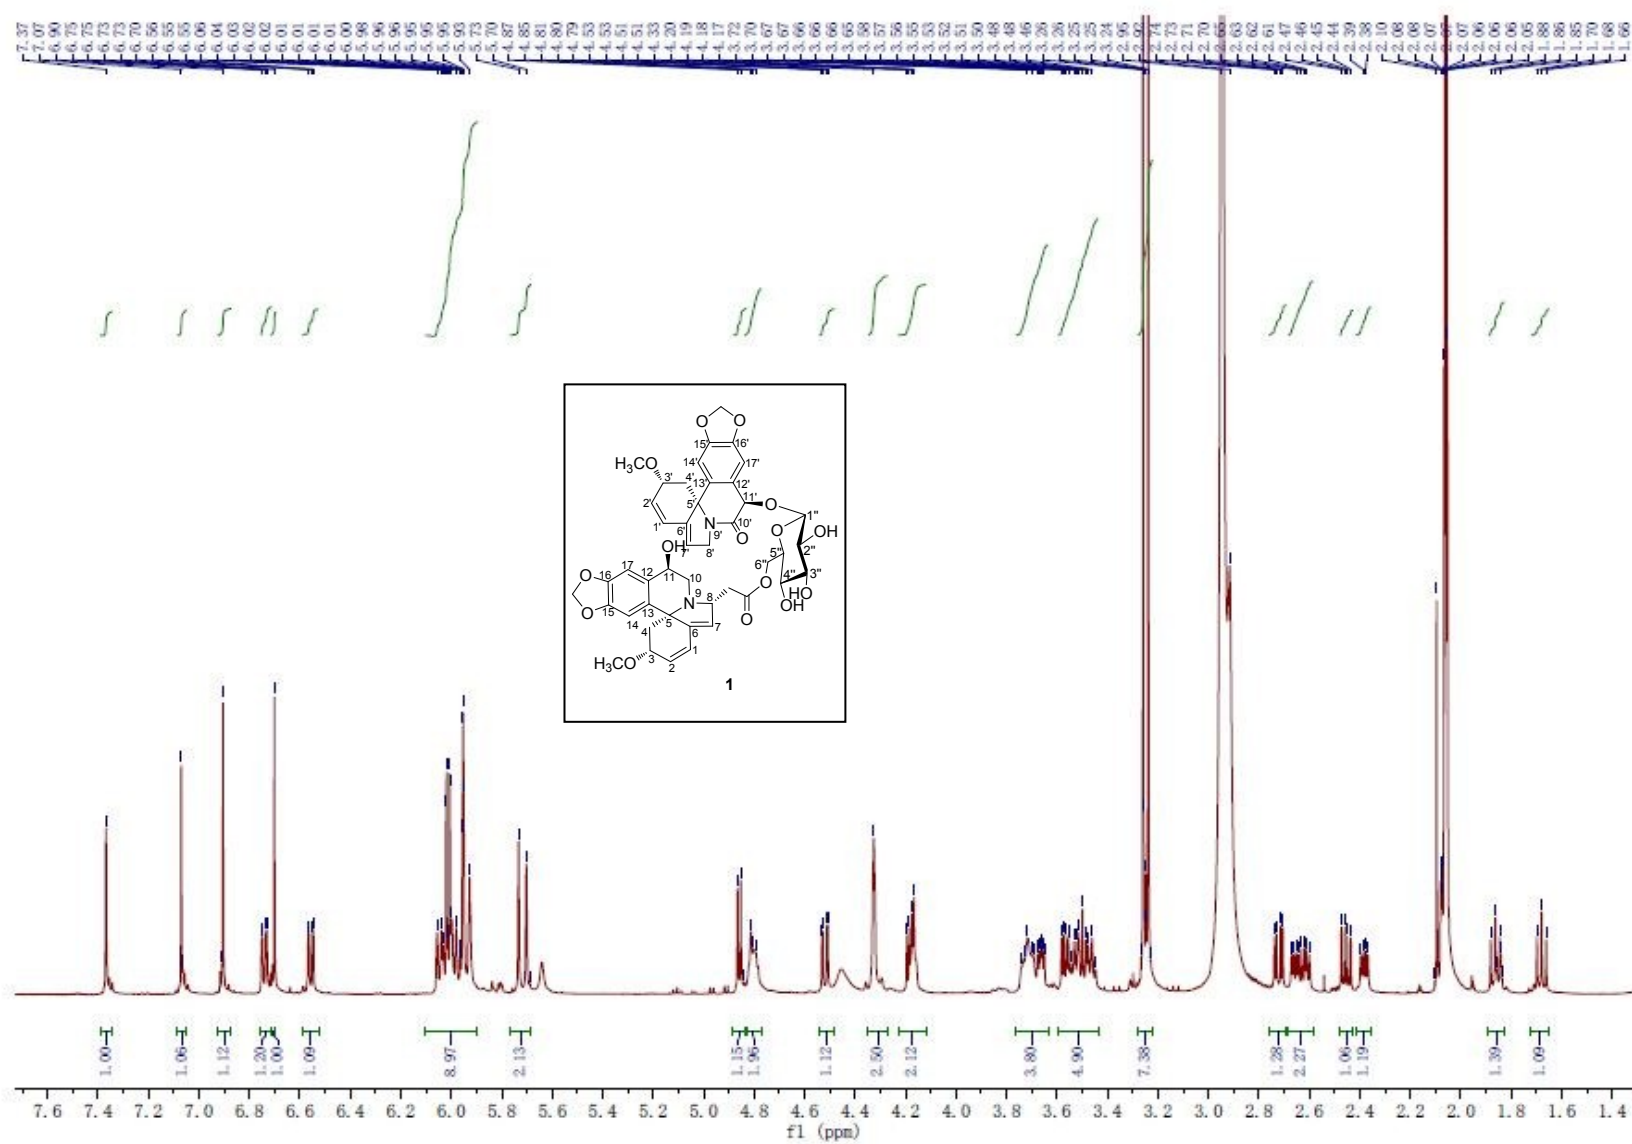

Expanded <sup>1</sup>H NMR spectrum of Erythrivarine C (1)

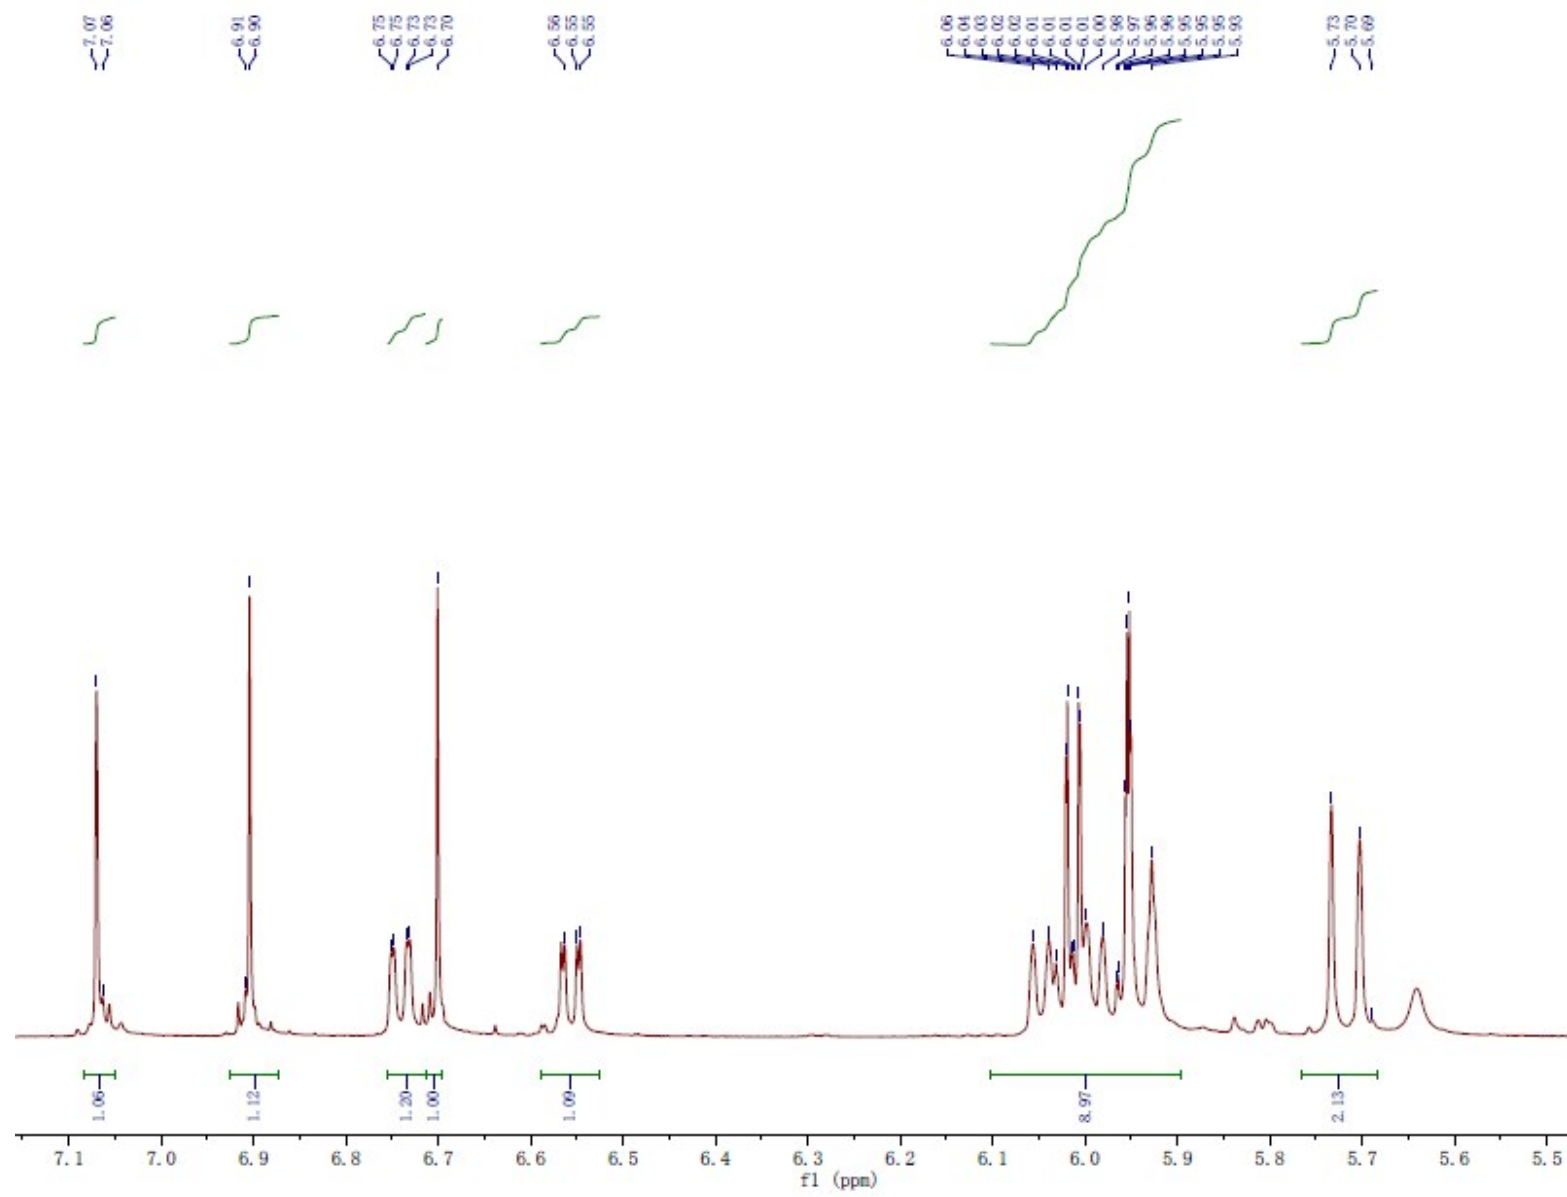

**Figure S2.**  $^{13}\text{C}$  NMR spectrum of erythrivarine C (**1**)

wech49  
d135 Acetone F:\ nmr 34

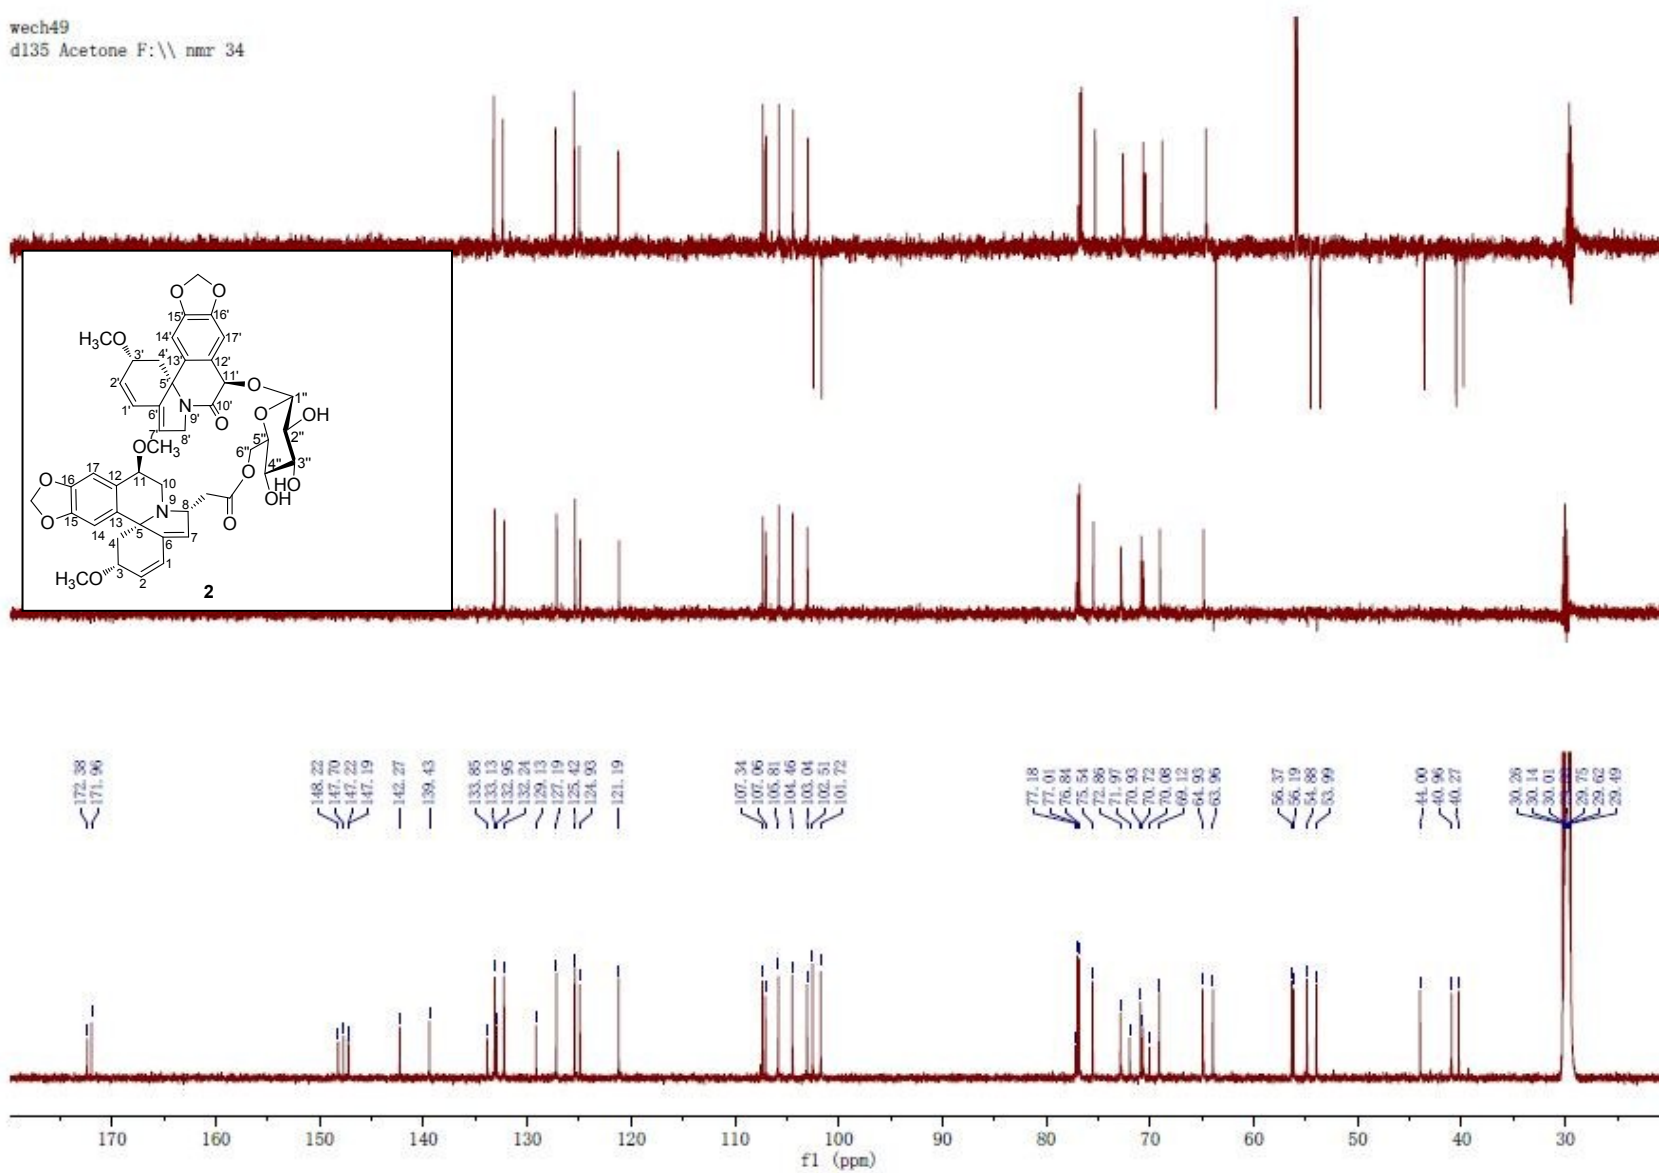

**Figure S3.** HSQC spectrum of erythrivarine C (**1**)

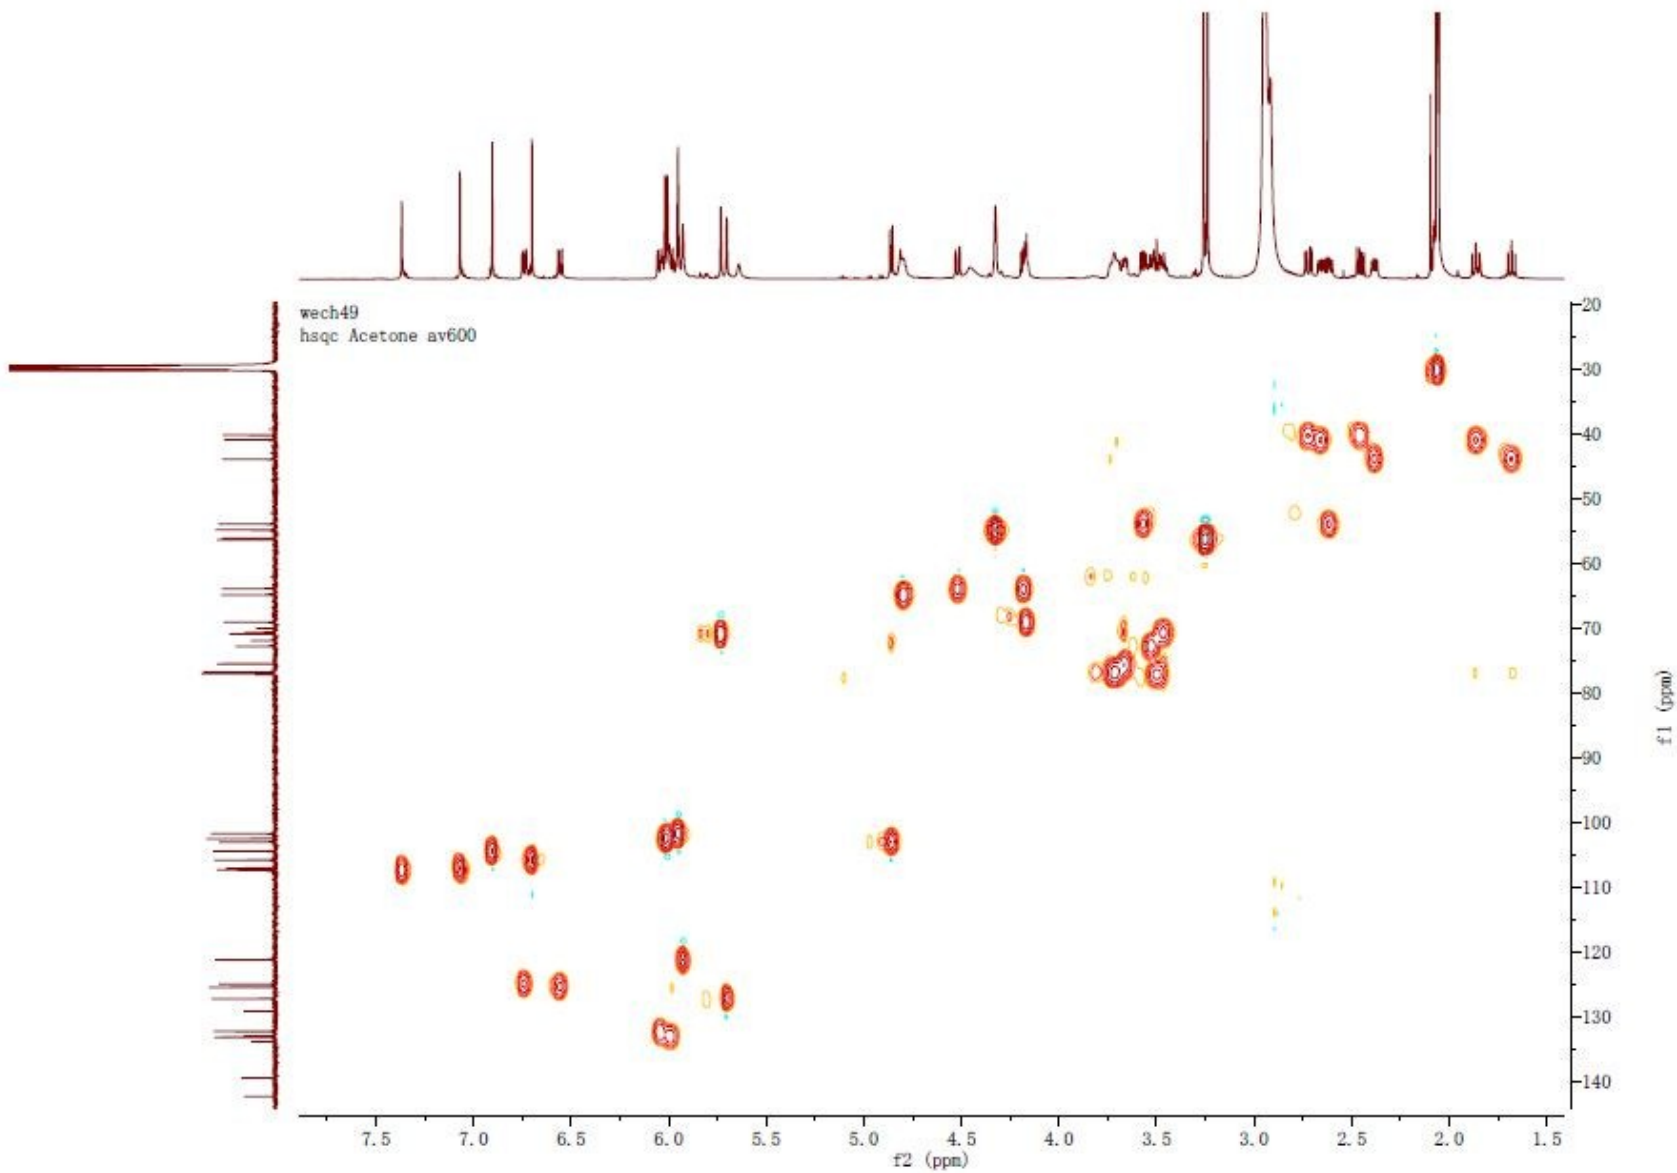

Expanded HSQC spectrum of erythrivarine C (1)

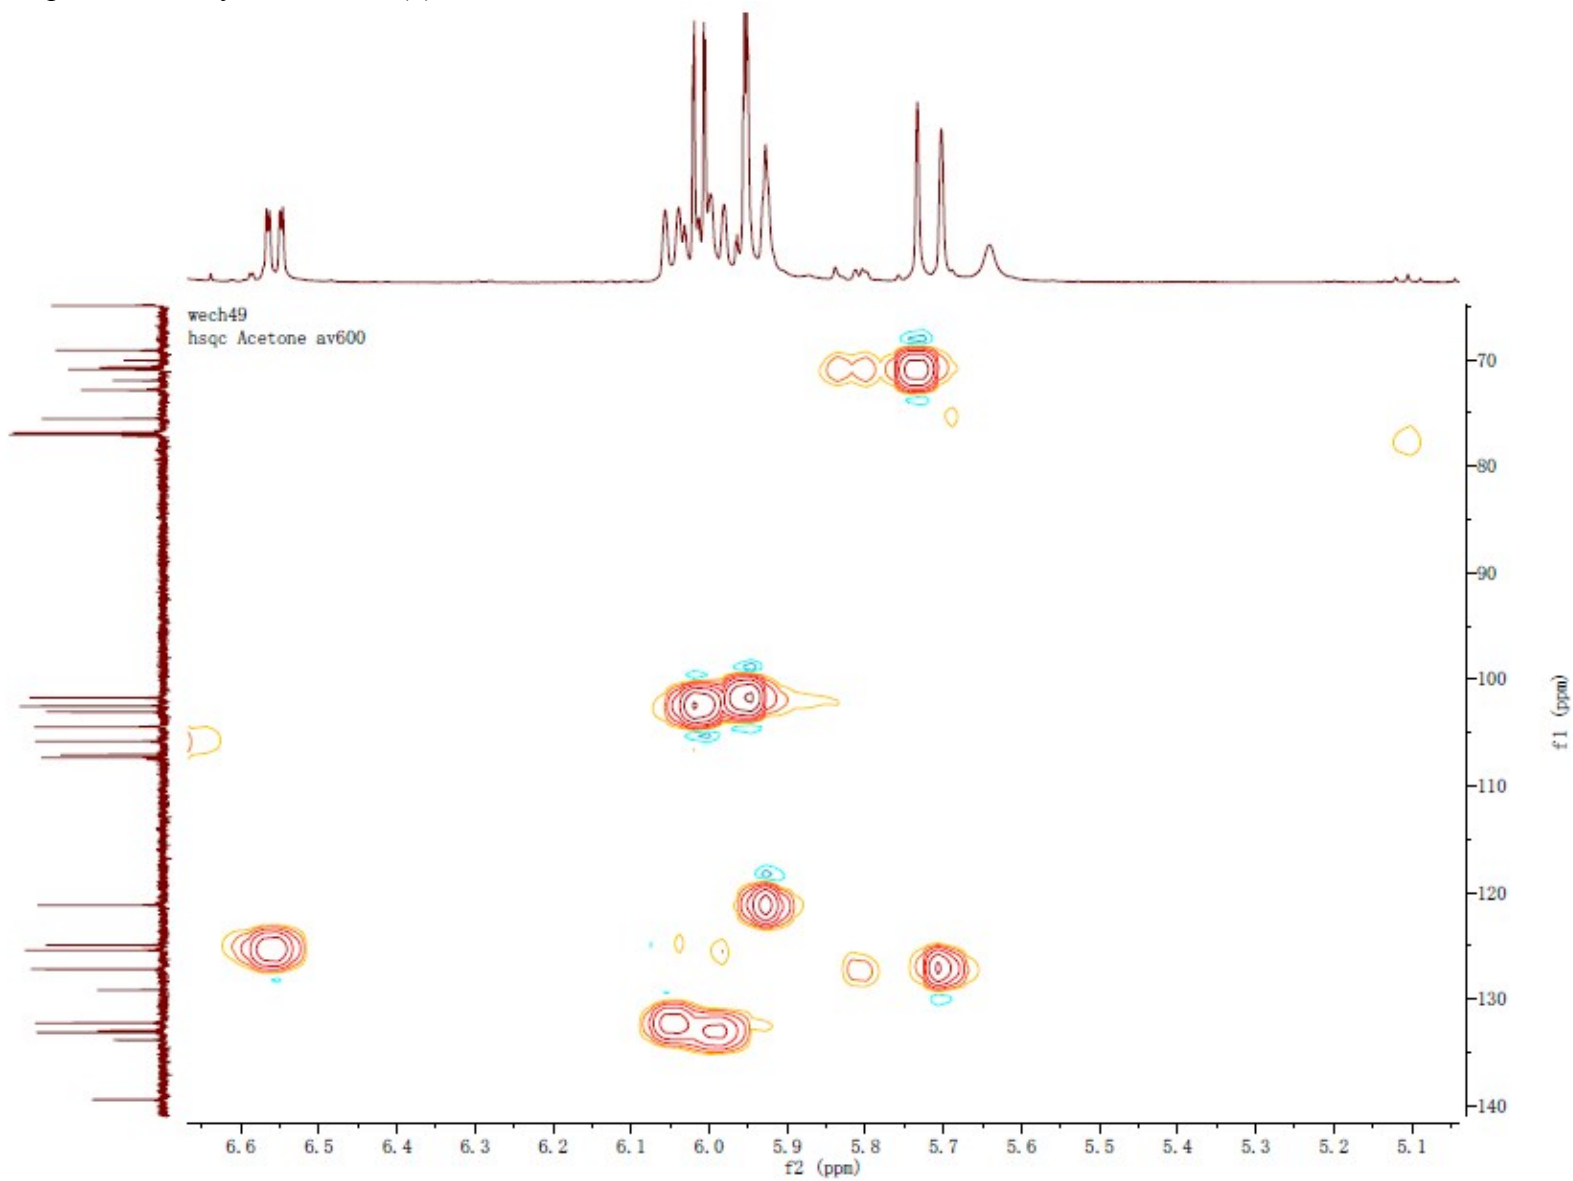



**Figure S4.** HMBC spectrum of erythrivarine C (**1**)

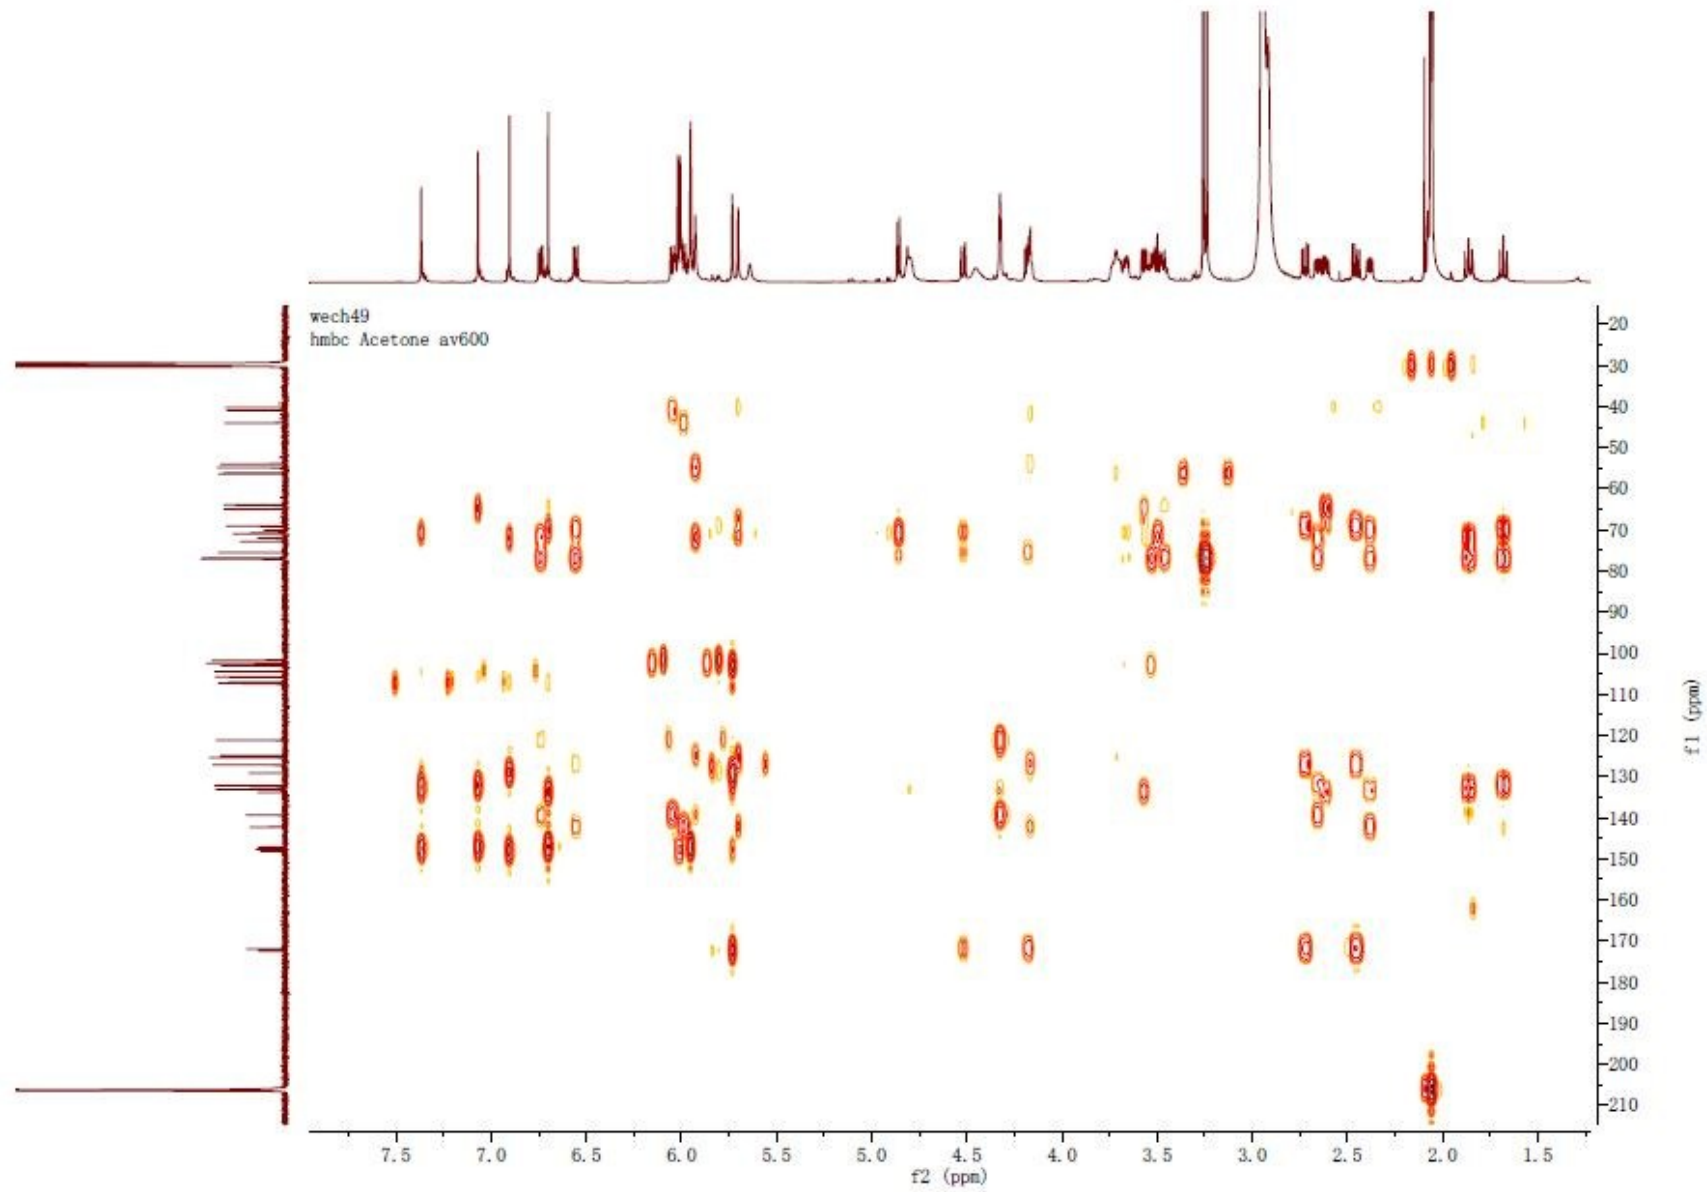

**Figure S5.**  $^1\text{H}$ - $^1\text{H}$  COSY spectrum of erythrivarine C (**1**)

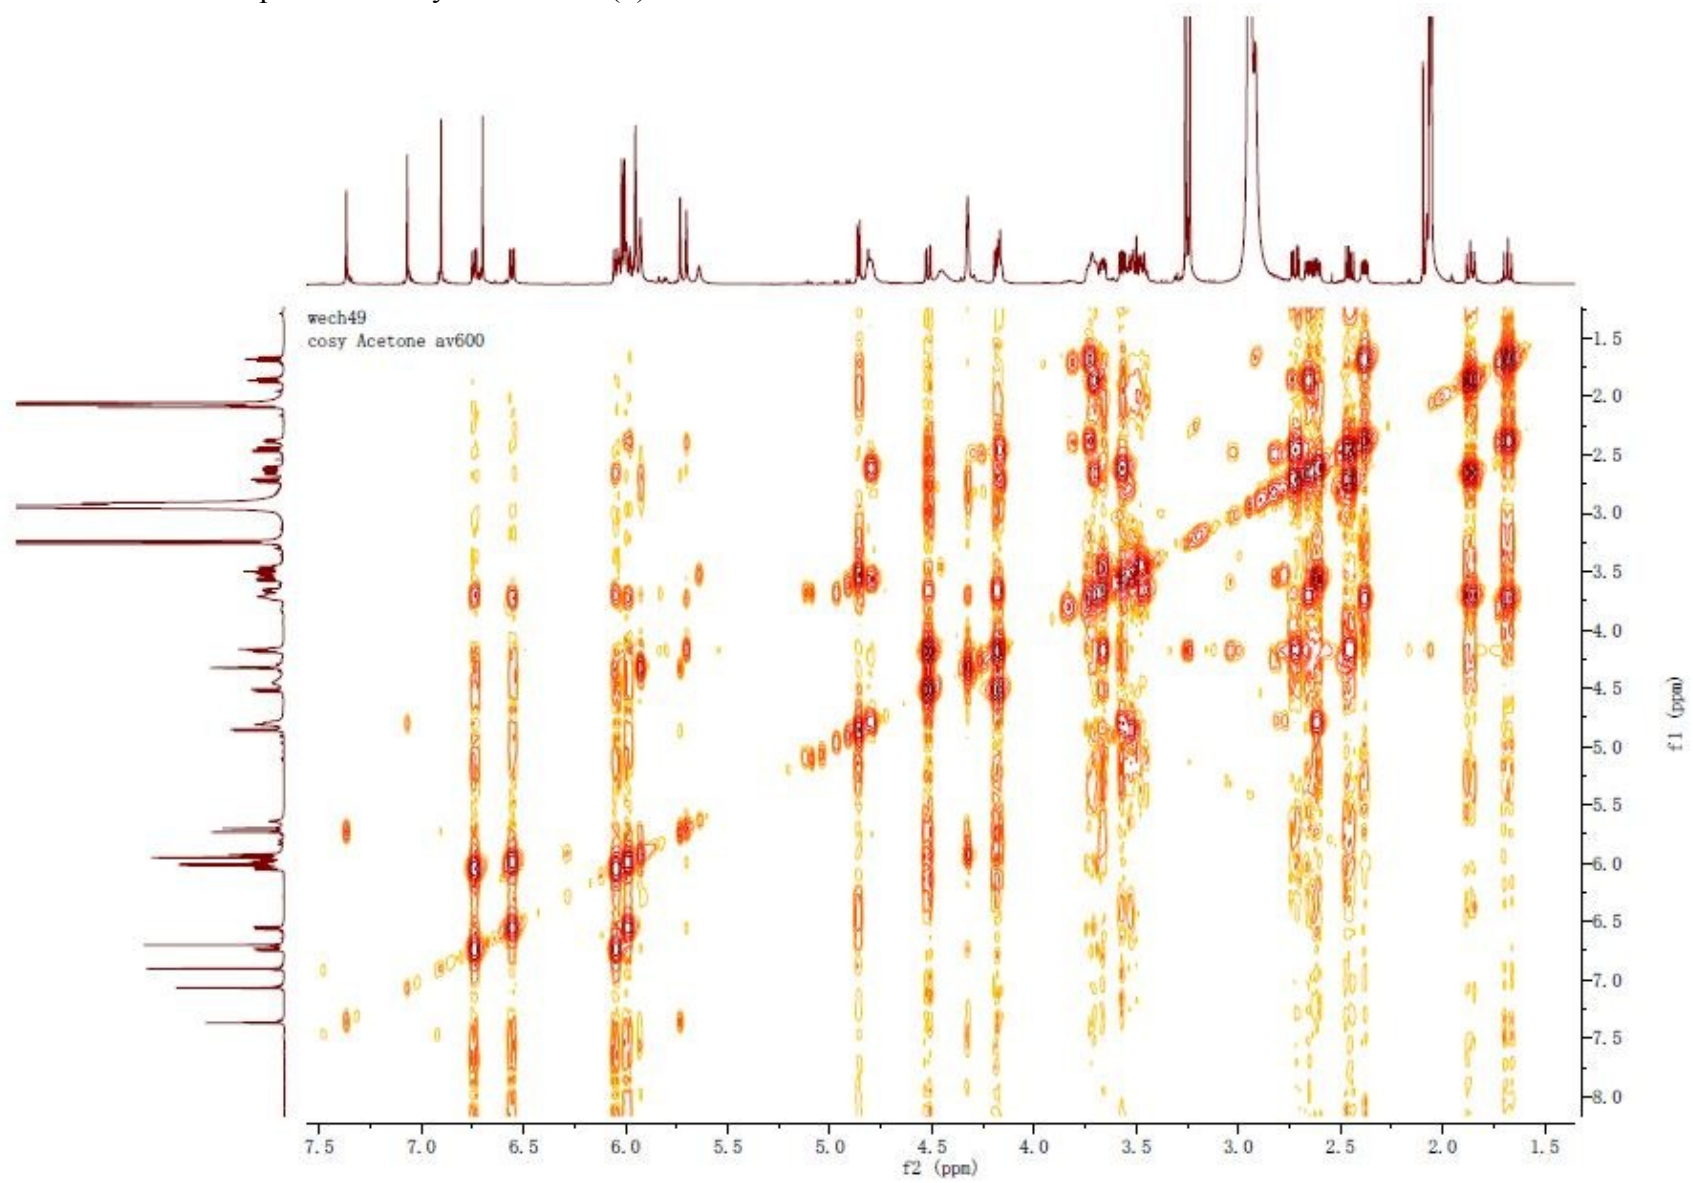

**Figure S6.** ROESY spectrum of erythrivarine C (**1**)

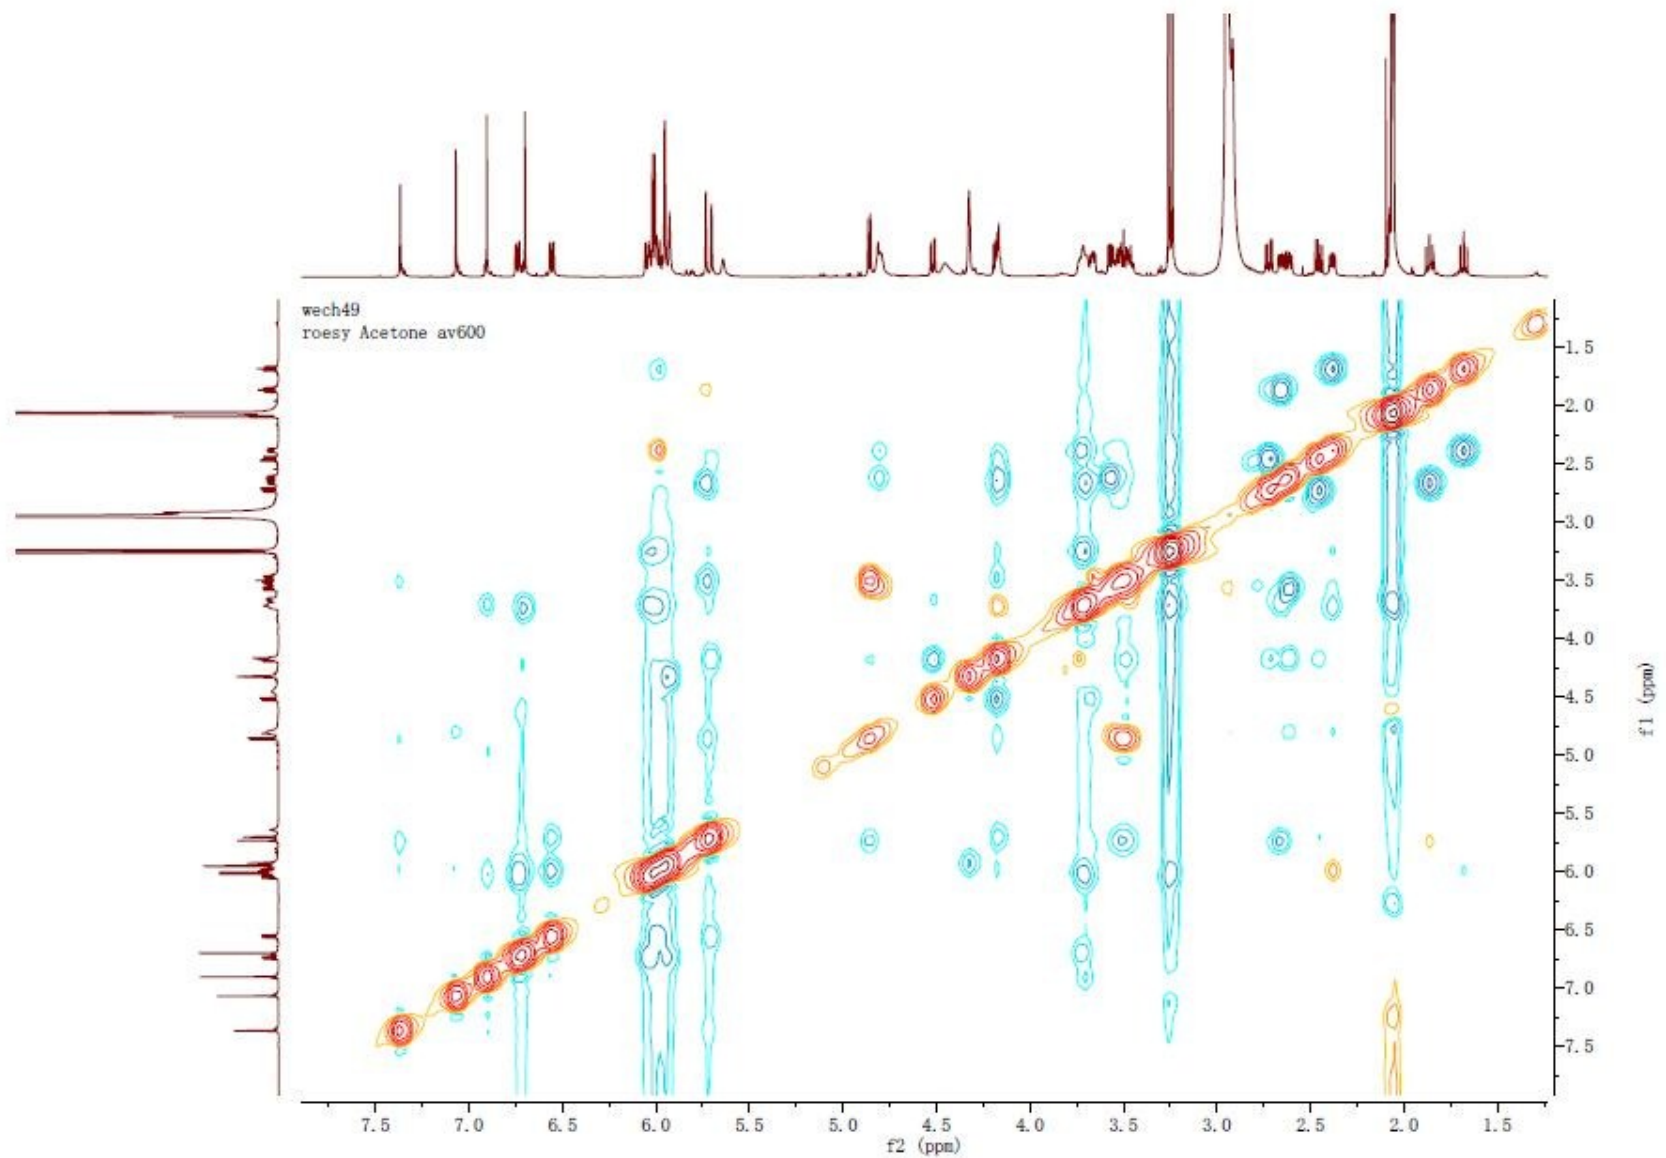

Figure S7. <sup>1</sup>H NMR spectrum of erythrivarine D (2)

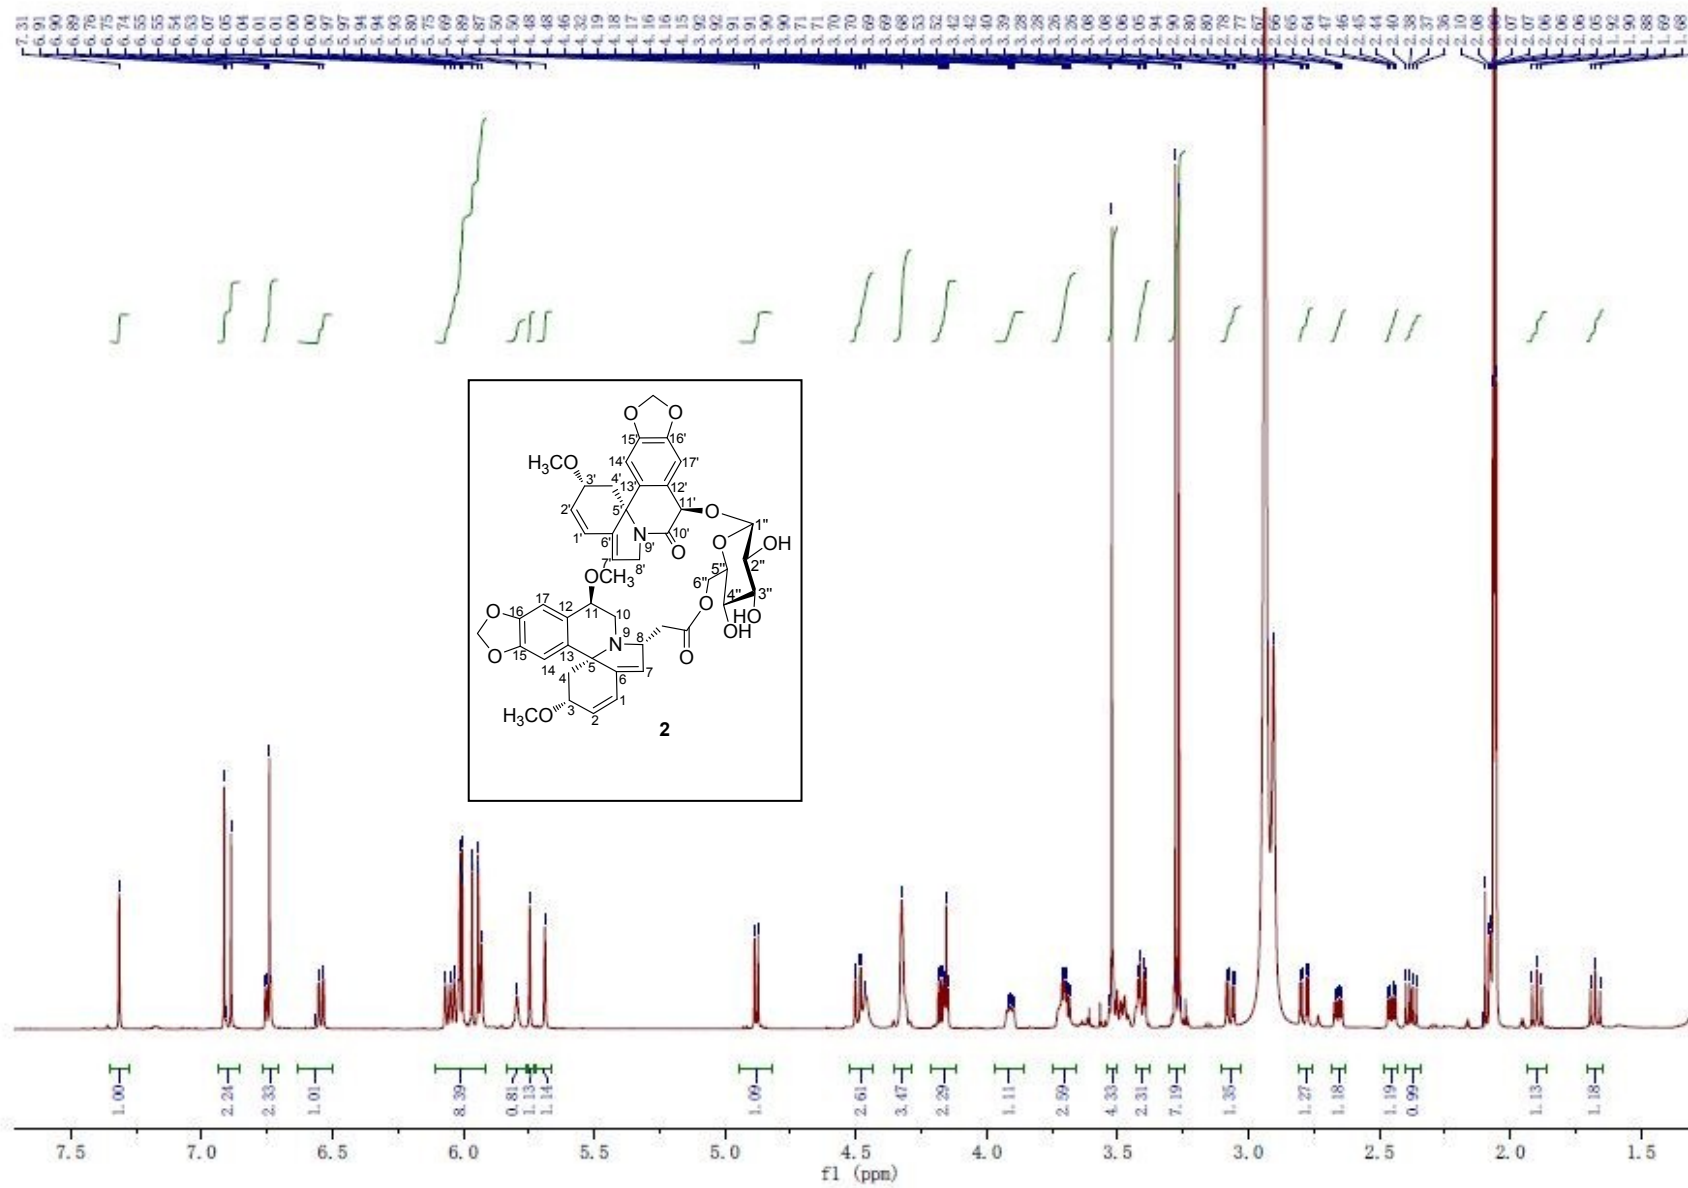

**Figure S8.**  $^{13}\text{C}$  NMR spectrum of erythrivarine D (**2**)

wech51

d135 Acetone F:\ nmr 57

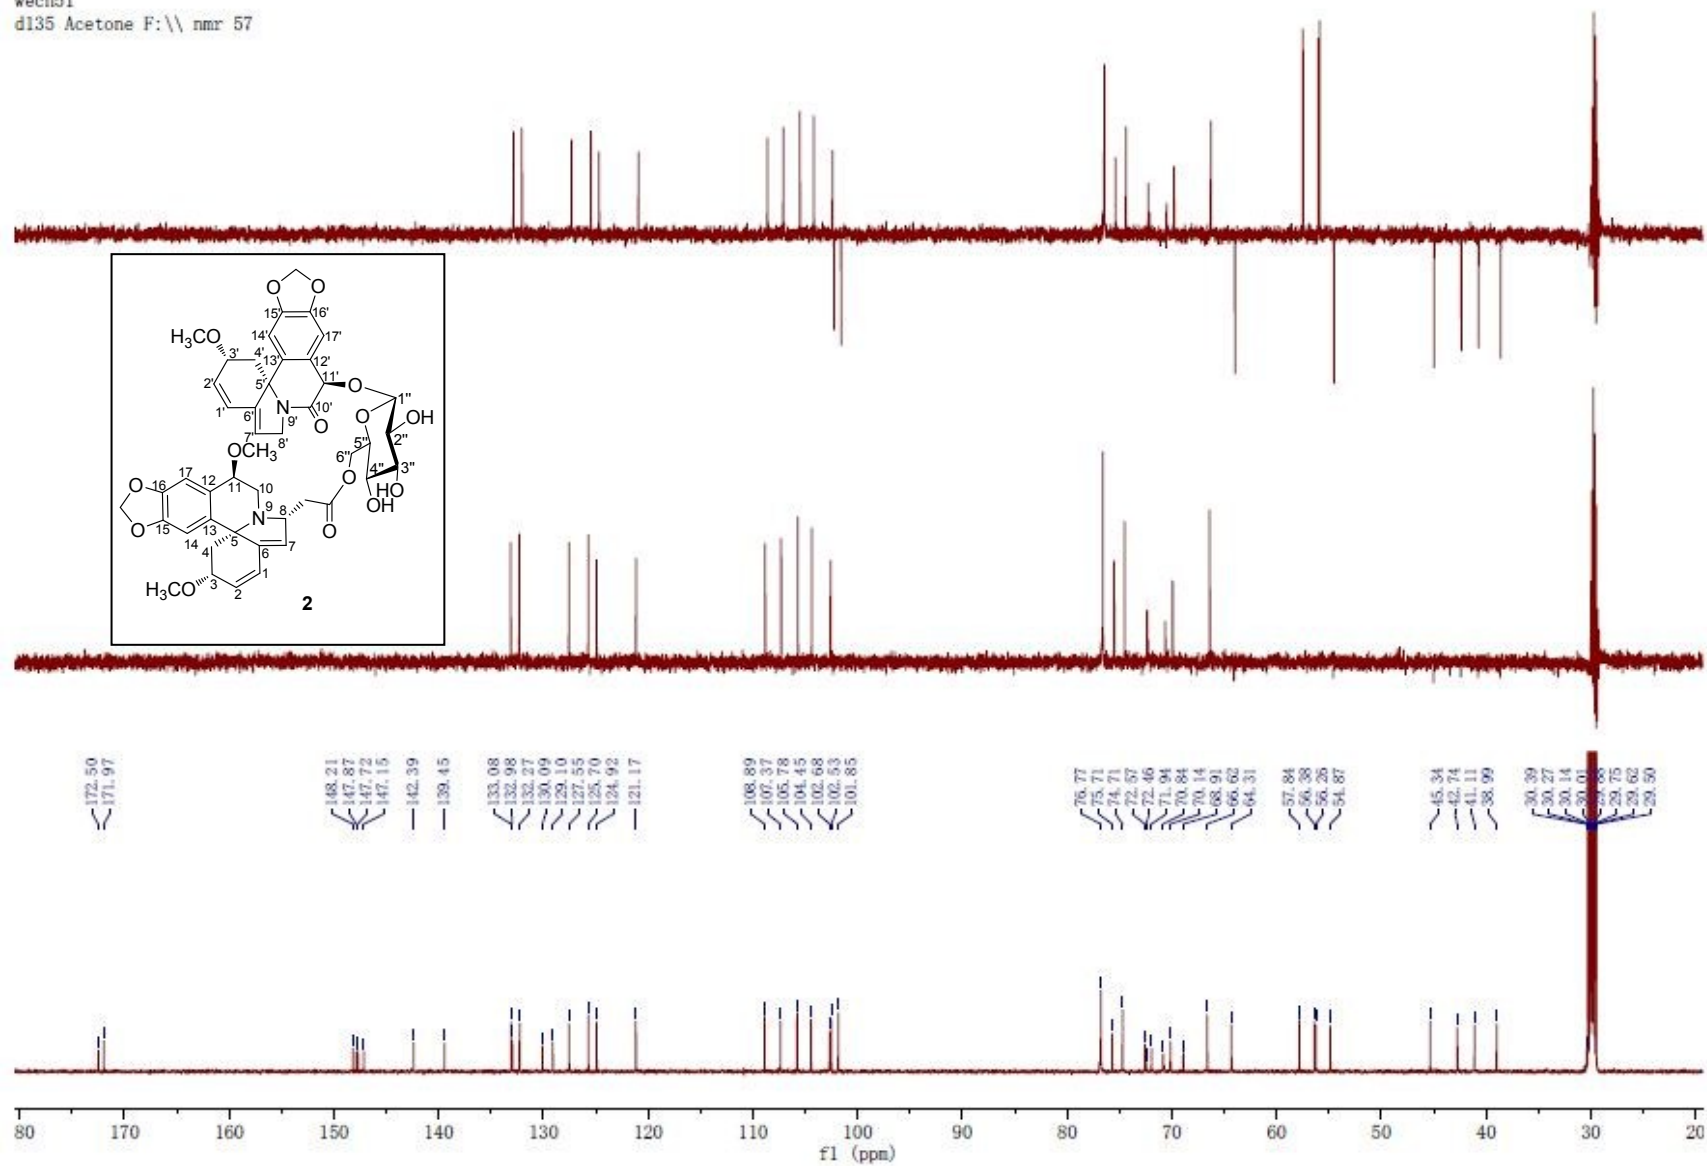



**Figure S9.** HSQC spectrum of erythrivarine D (2)

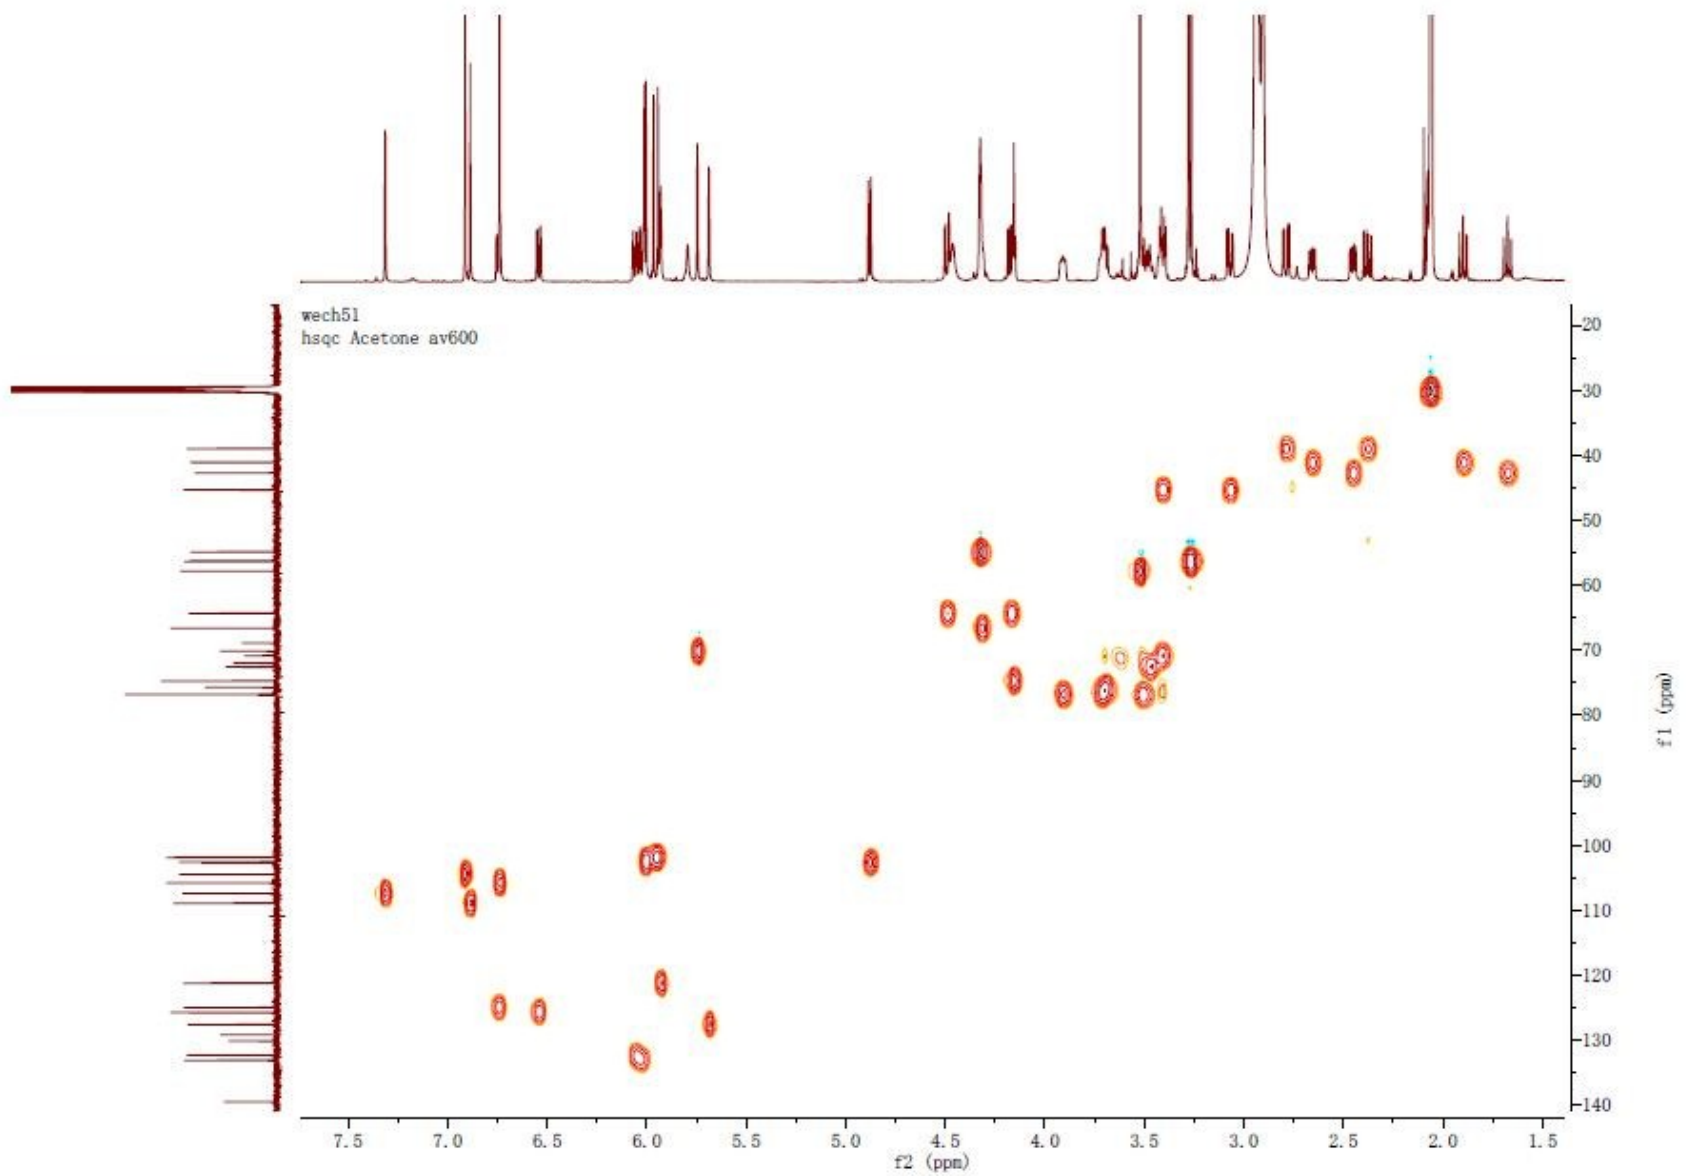

**Figure S10.** HMBC spectrum of erythrivarine D (2)

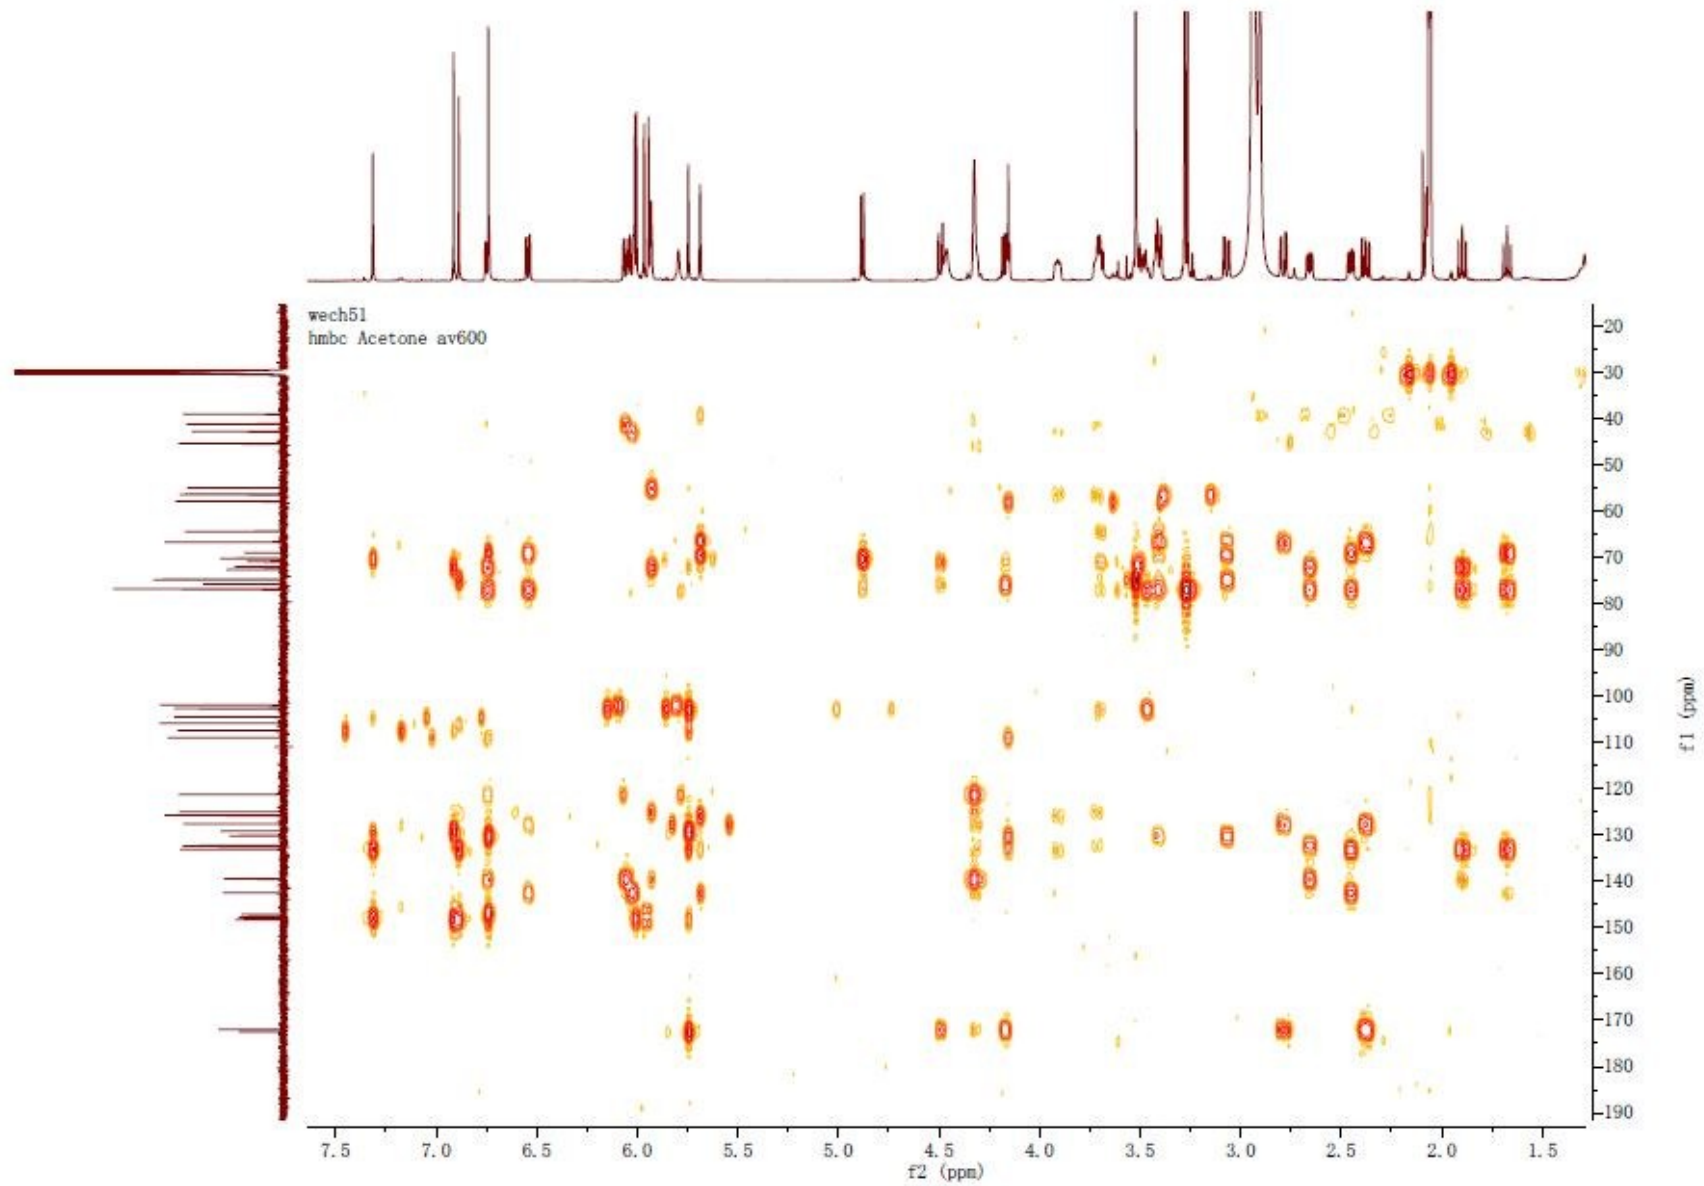

**Figure S11.**  $^1\text{H}$ - $^1\text{H}$  COSY spectrum of erythrivarine D (2)

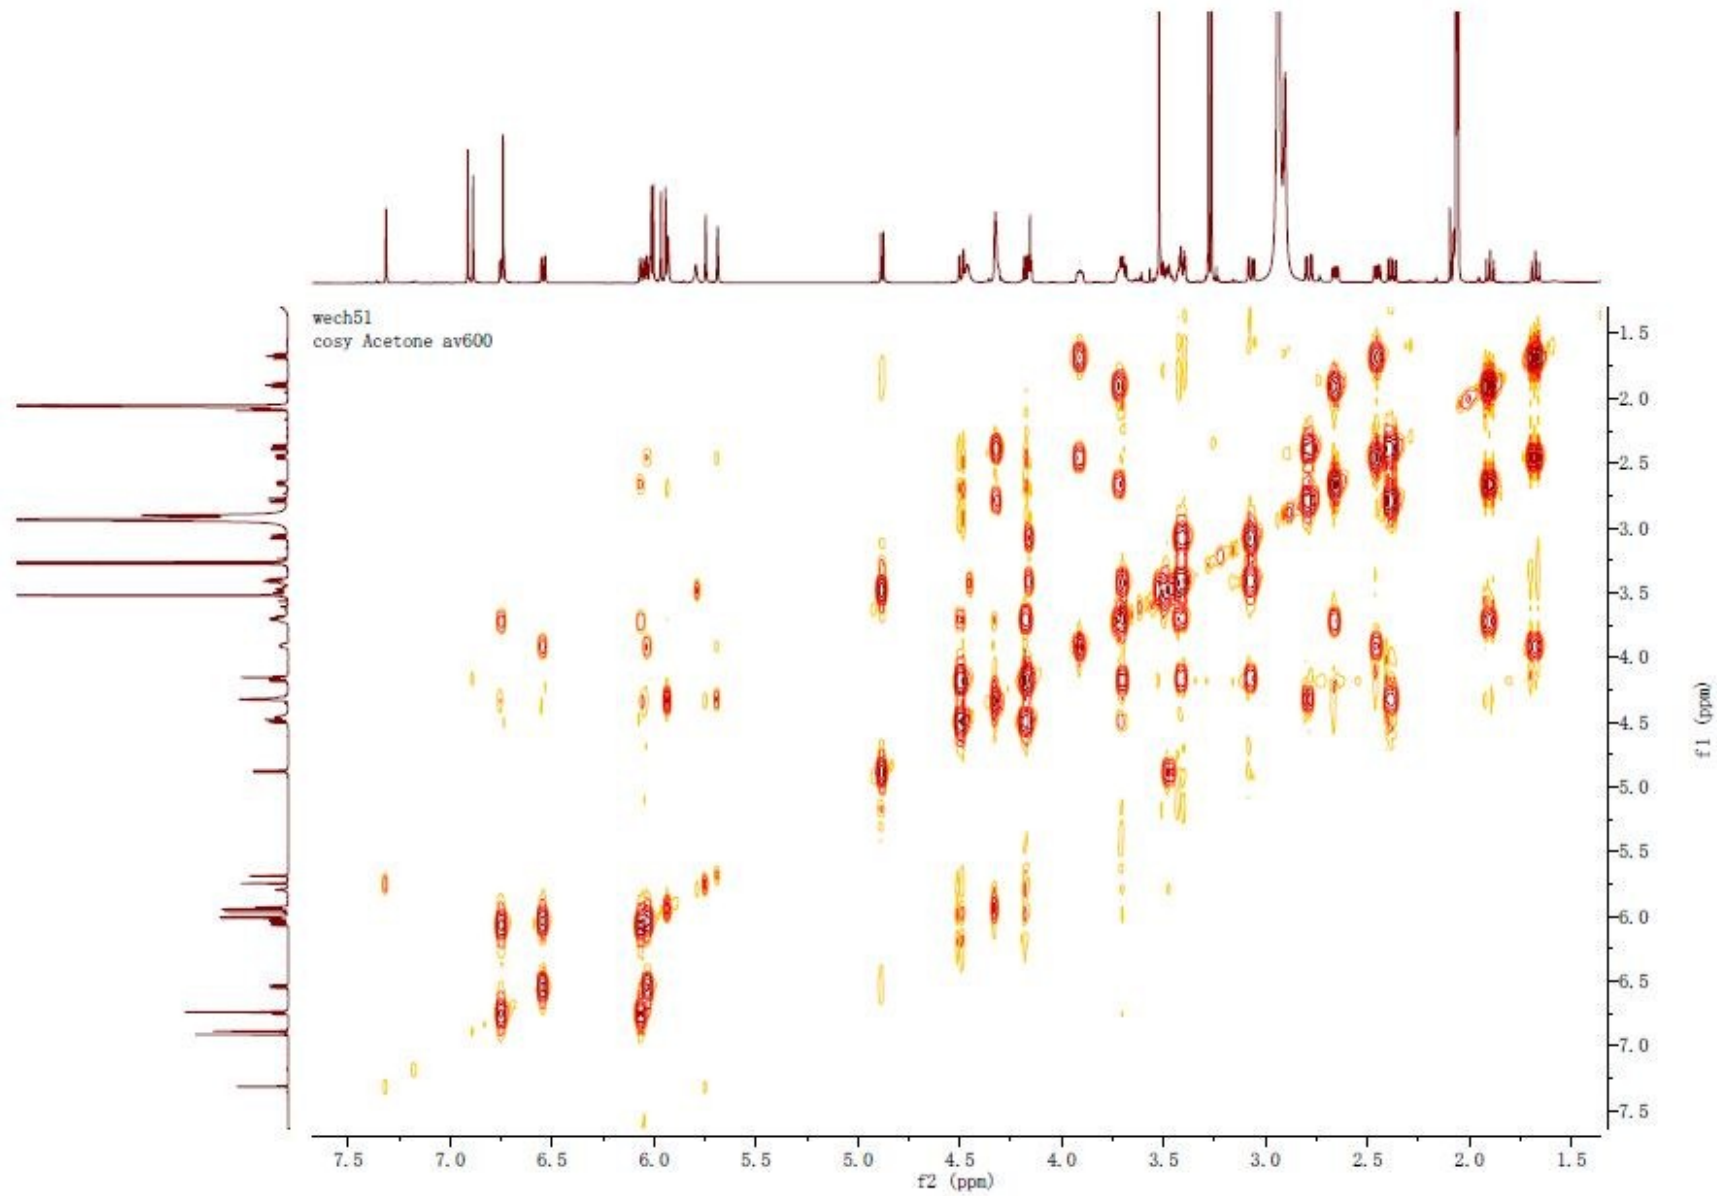



**Figure S12.** ROESY spectrum of erythrivarine D (2)

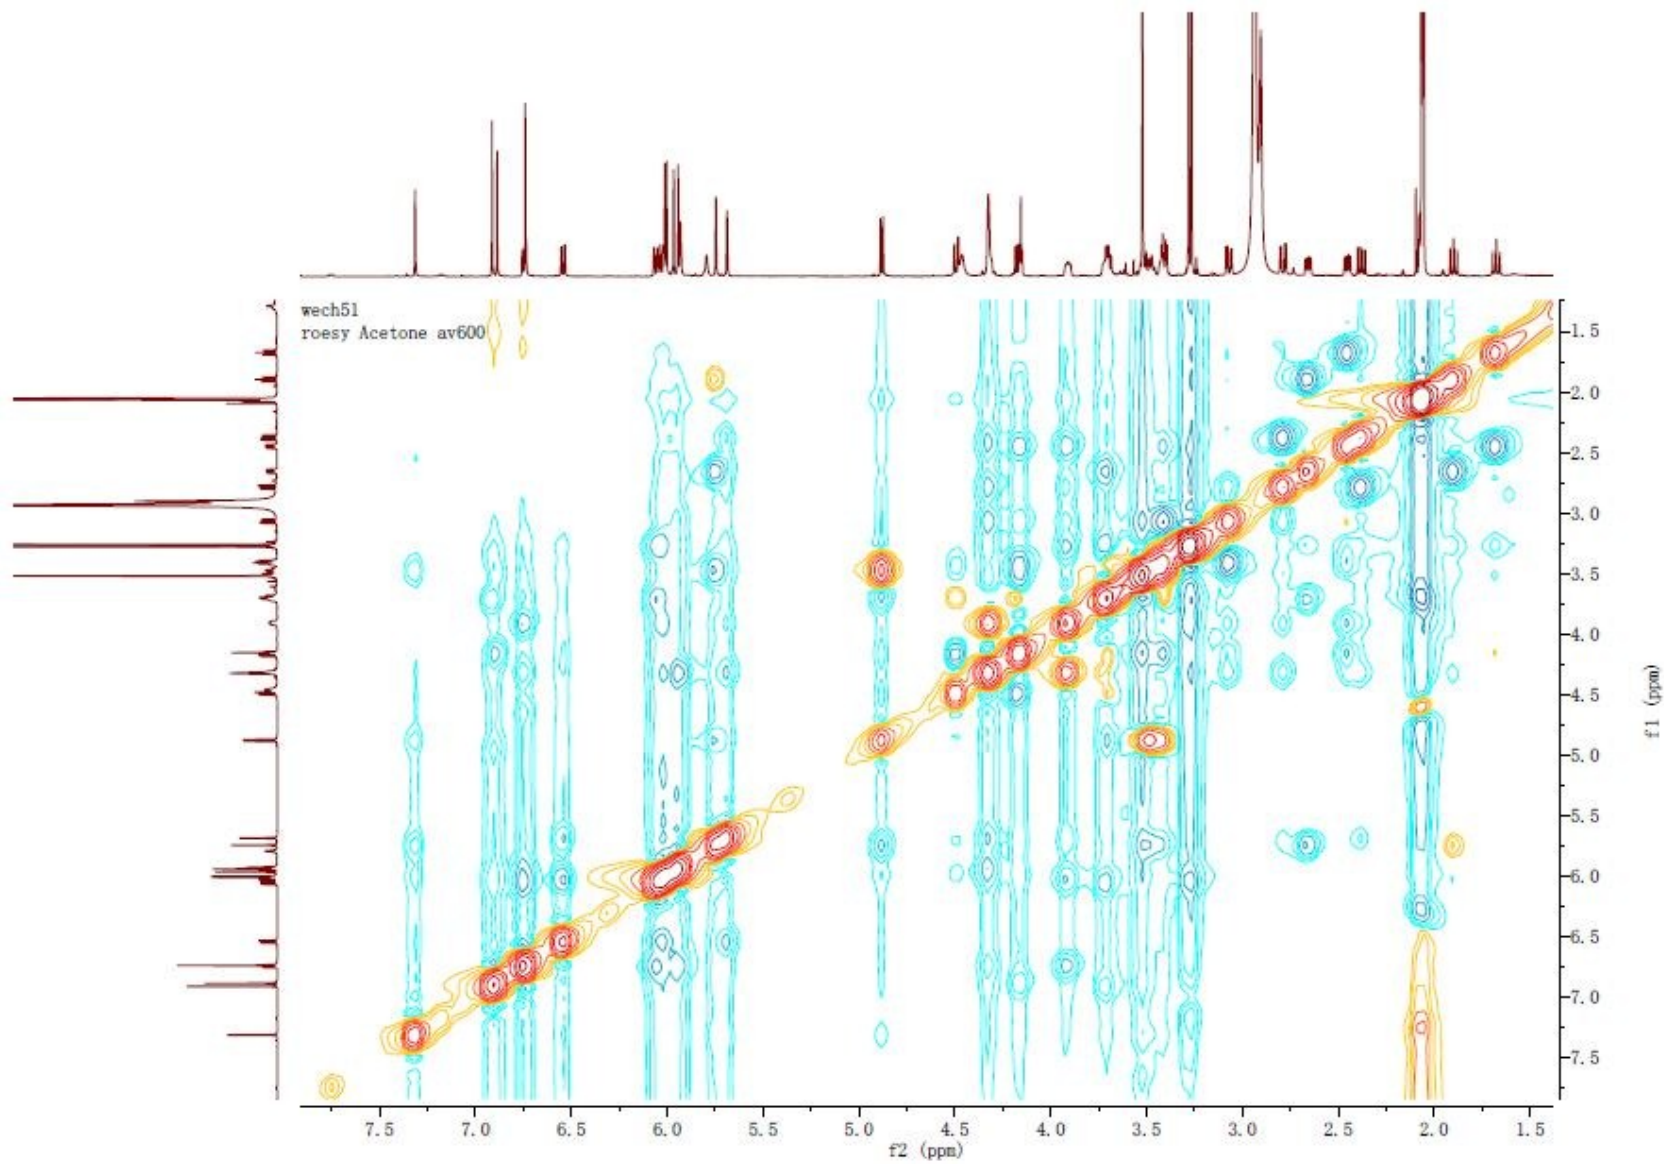

3、NMR spectroscopic data of trimeric erythrivarines F-G (3-5)

Figure S13. <sup>1</sup>H NMR spectrum of erythrivarine E (3)

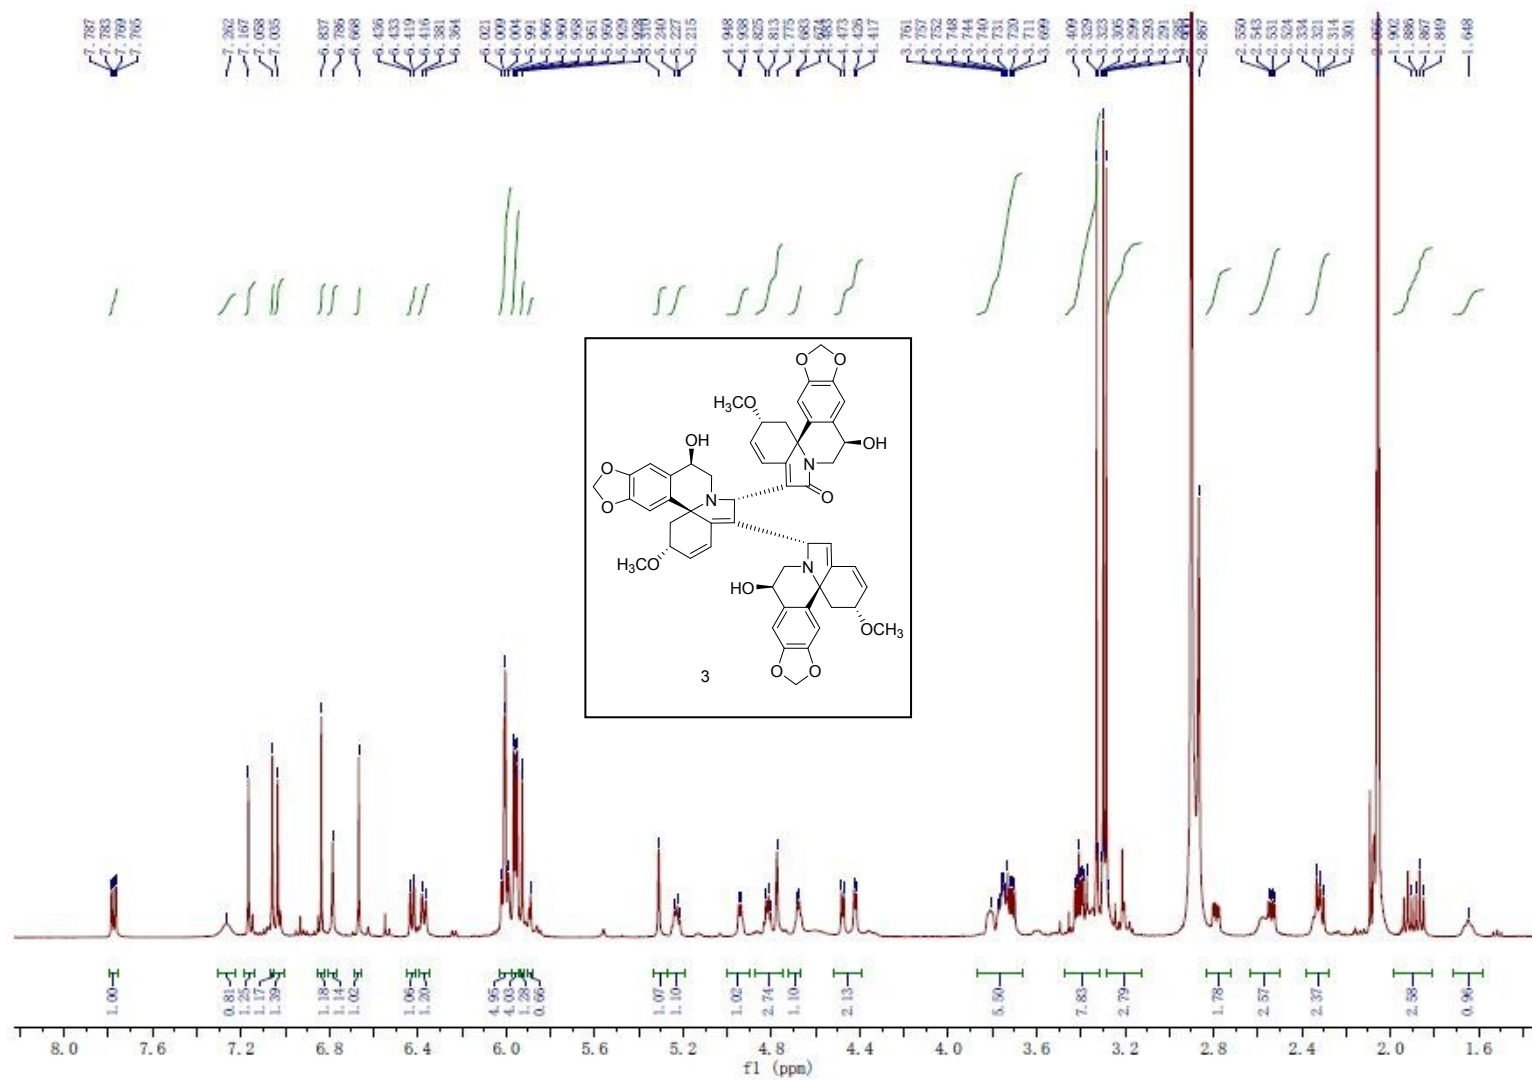

Expanded  $^1\text{H}$  NMR spectrum of erythrivarine E (3)

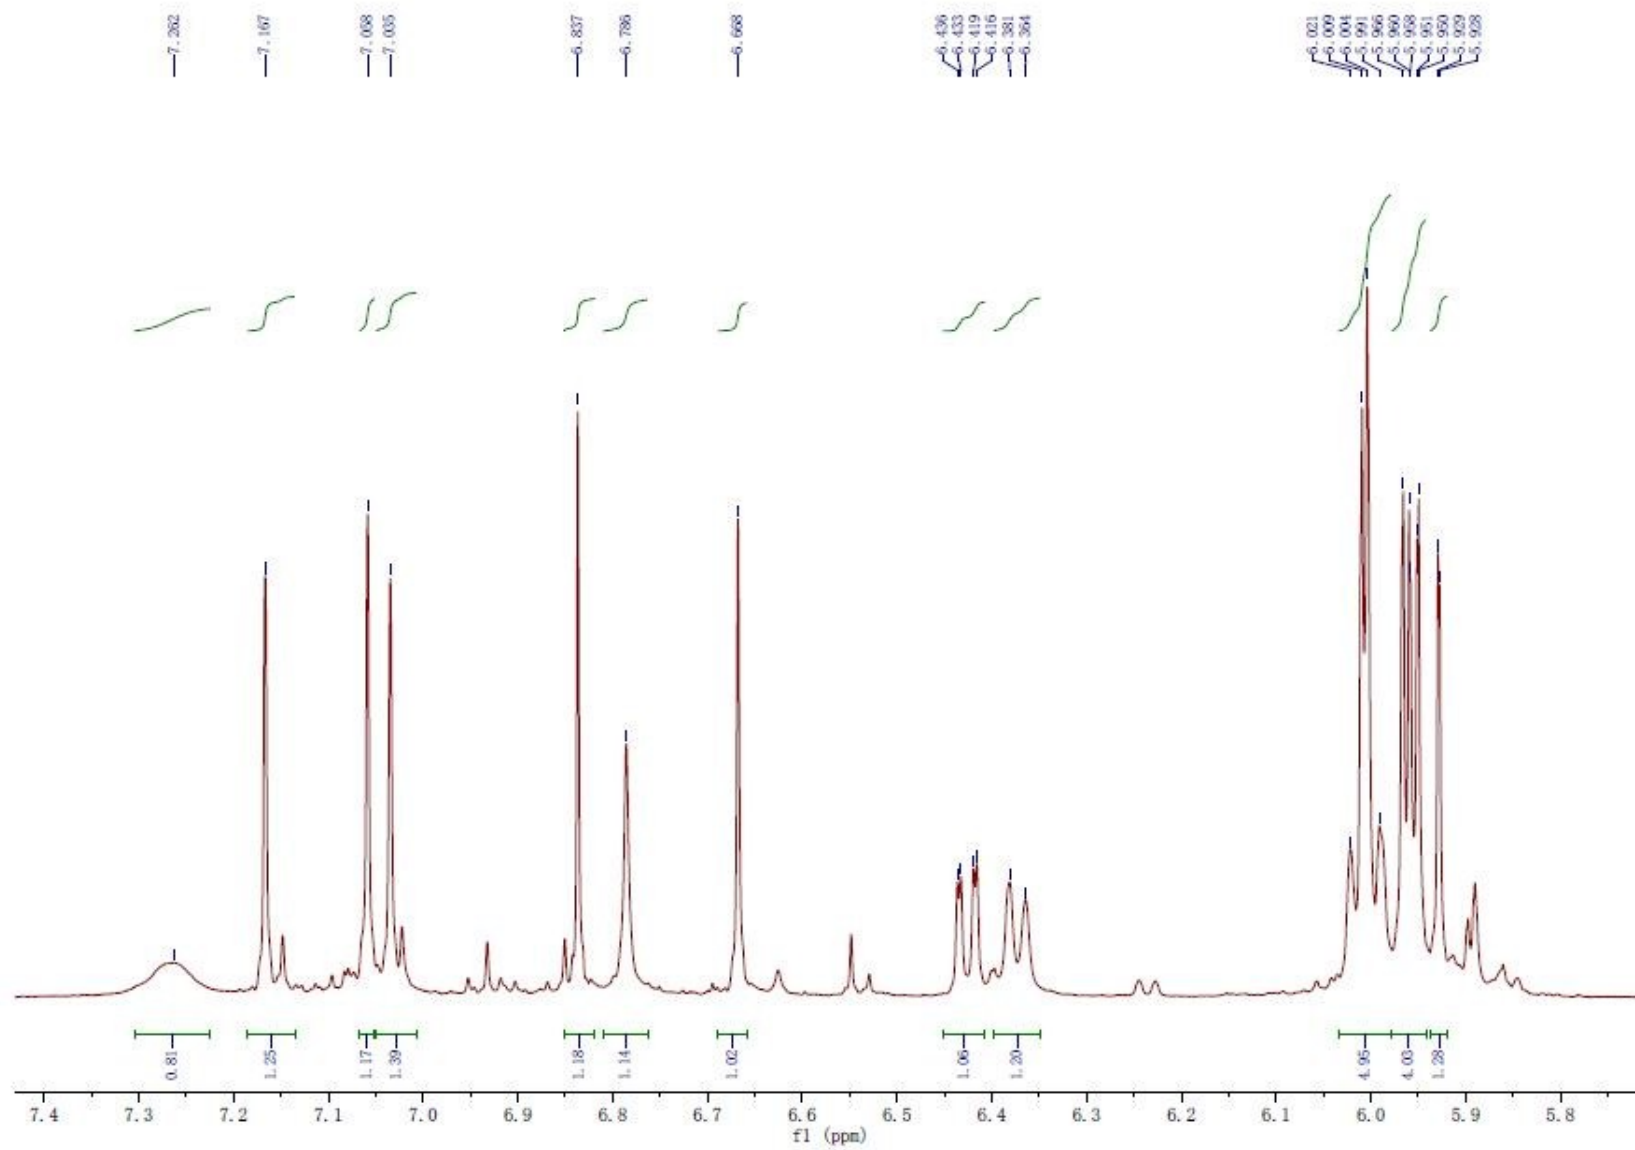

Figure S14.  $^{13}\text{C}$  NMR spectrum of erythrivarine E (3)

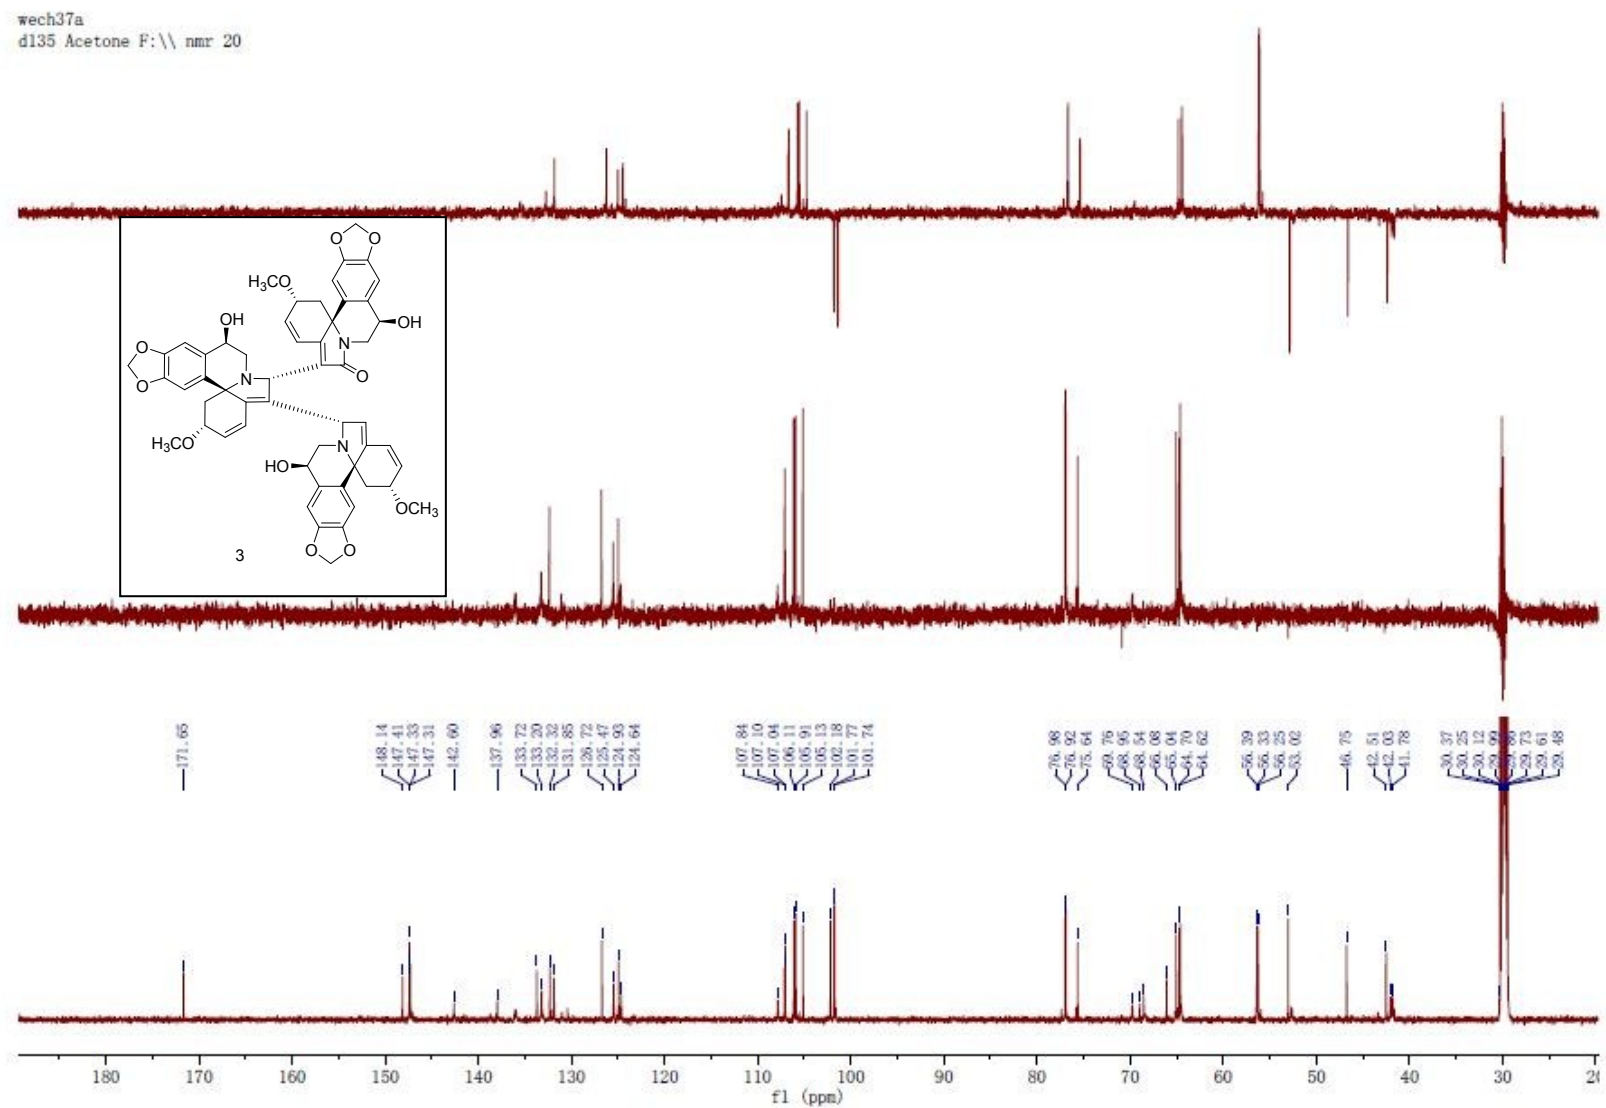

**Figure S15.** HSQC spectrum of erythrivarine E (**3**)

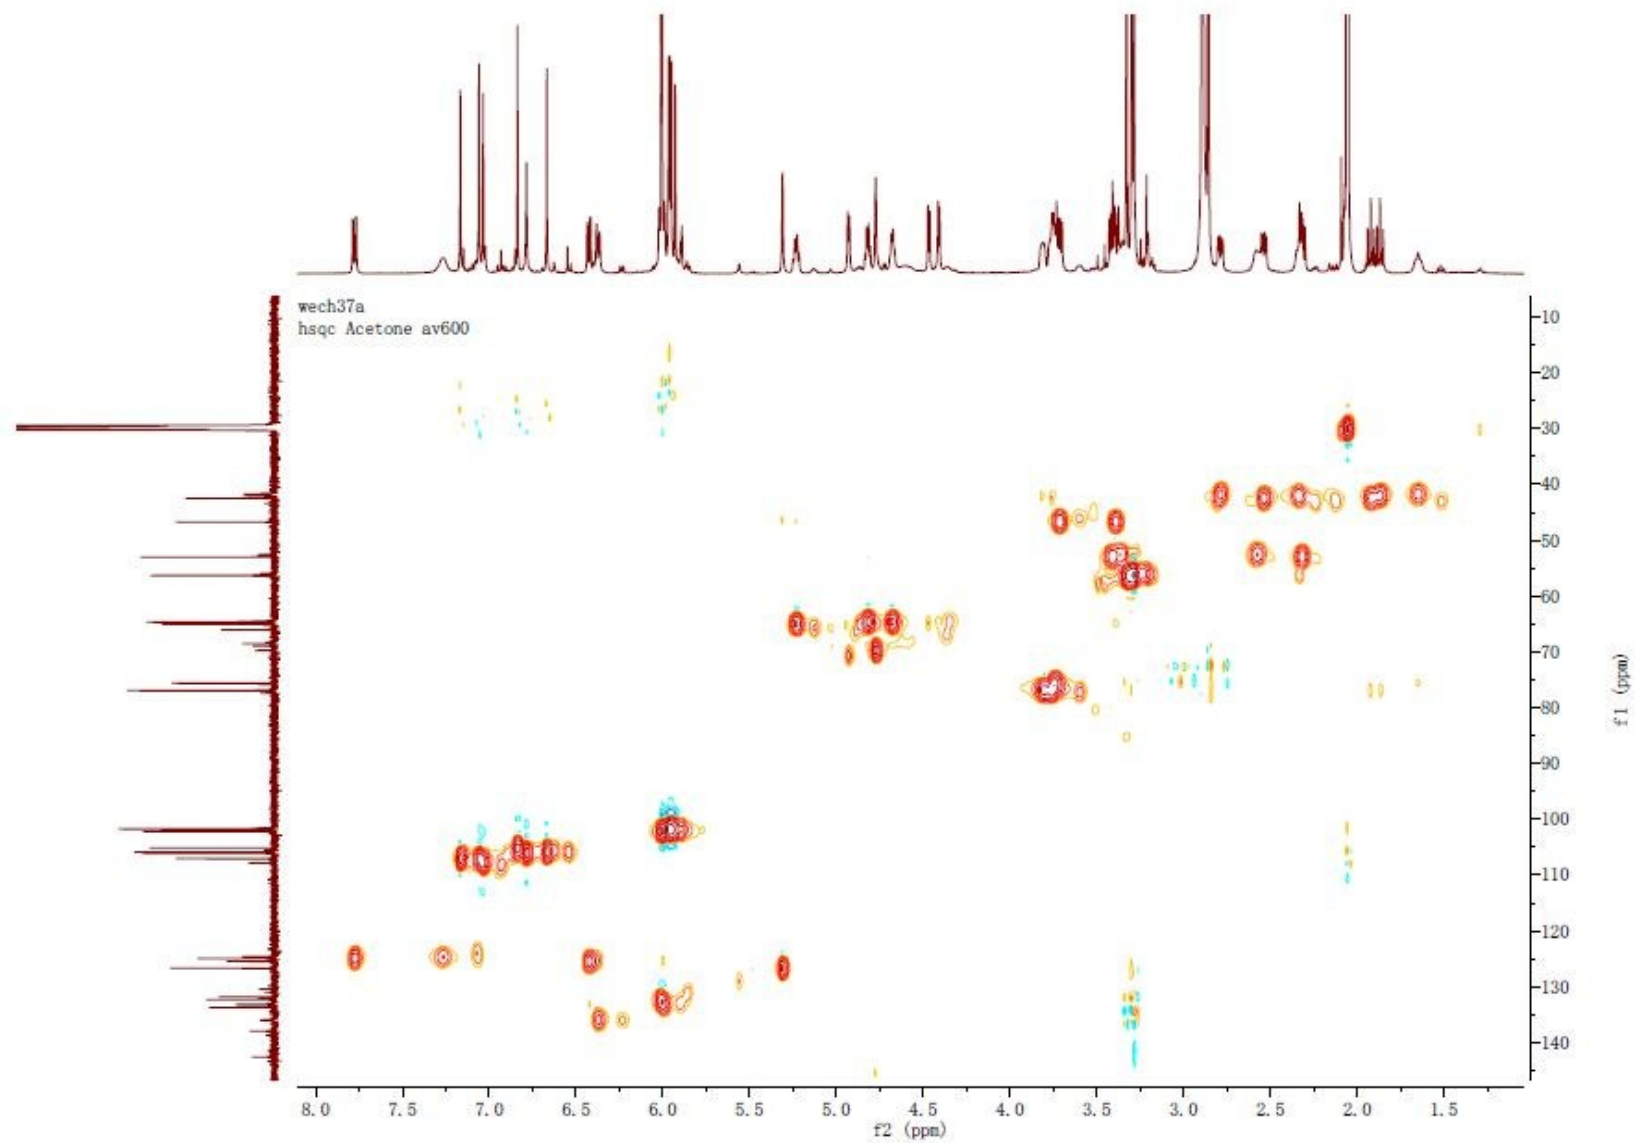

Expanded HSQC spectrum of erythrivarine E (3)

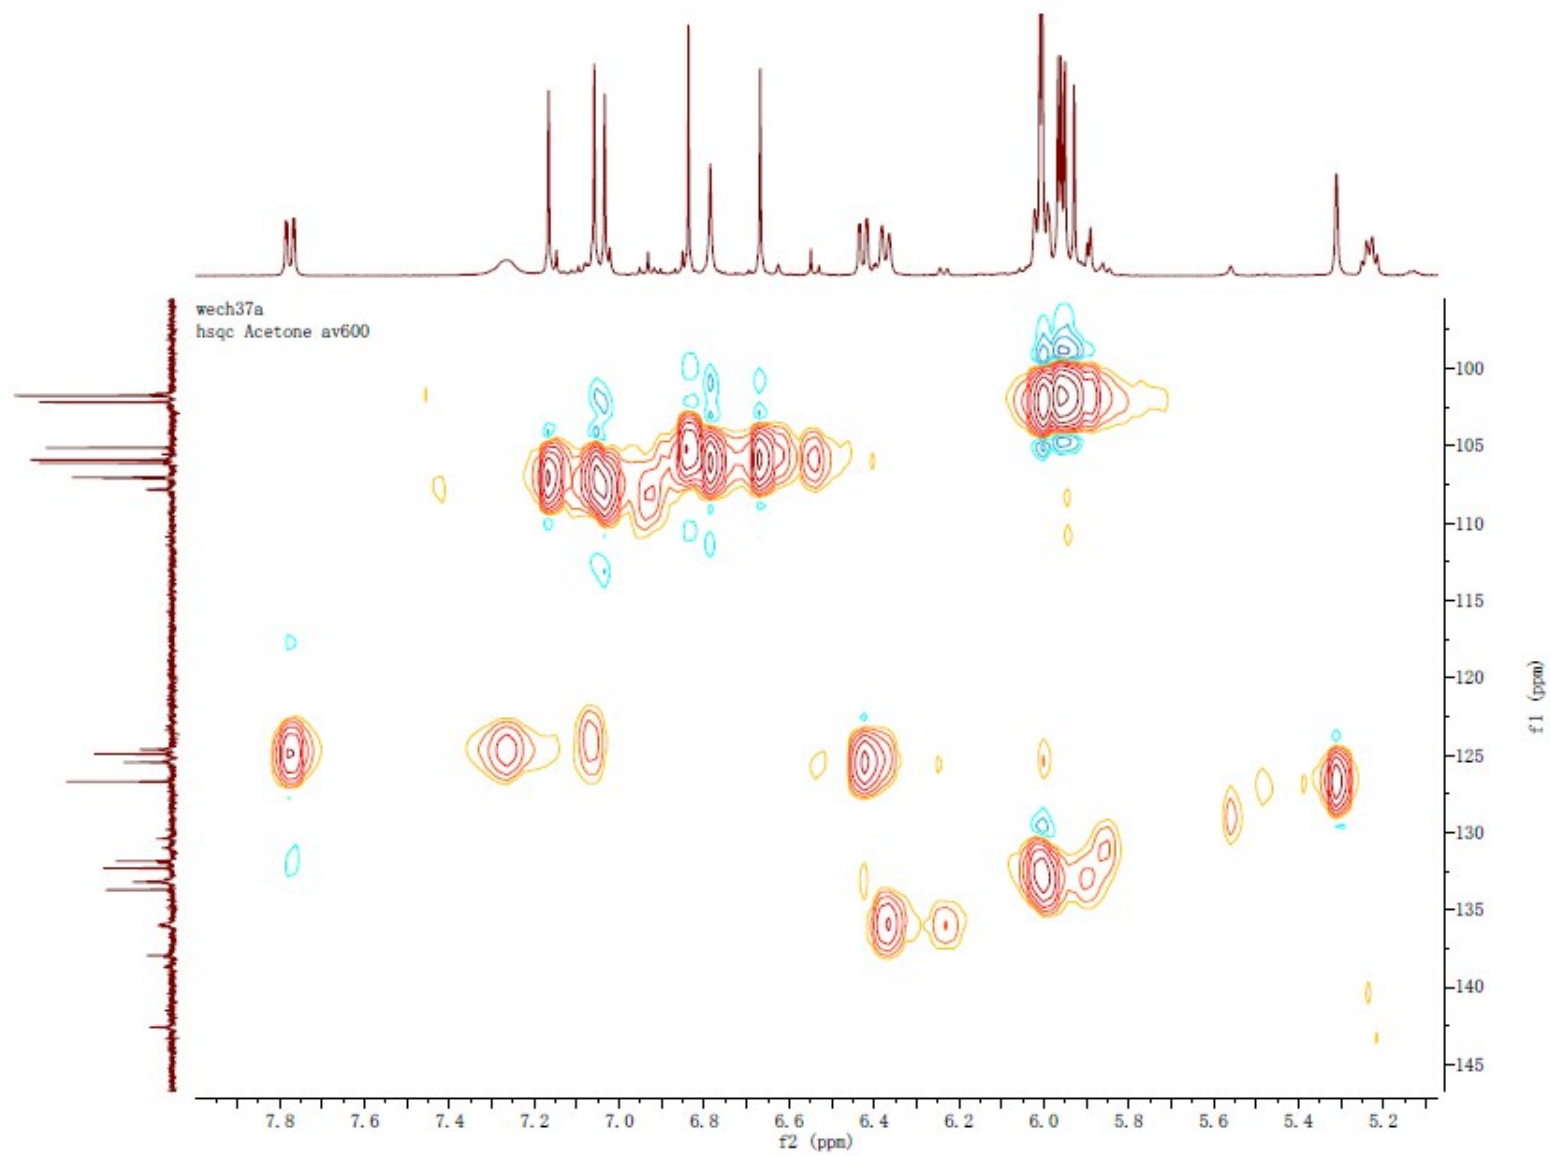



**Figure S16.** HMBC spectrum of erythrivarine E (**3**)

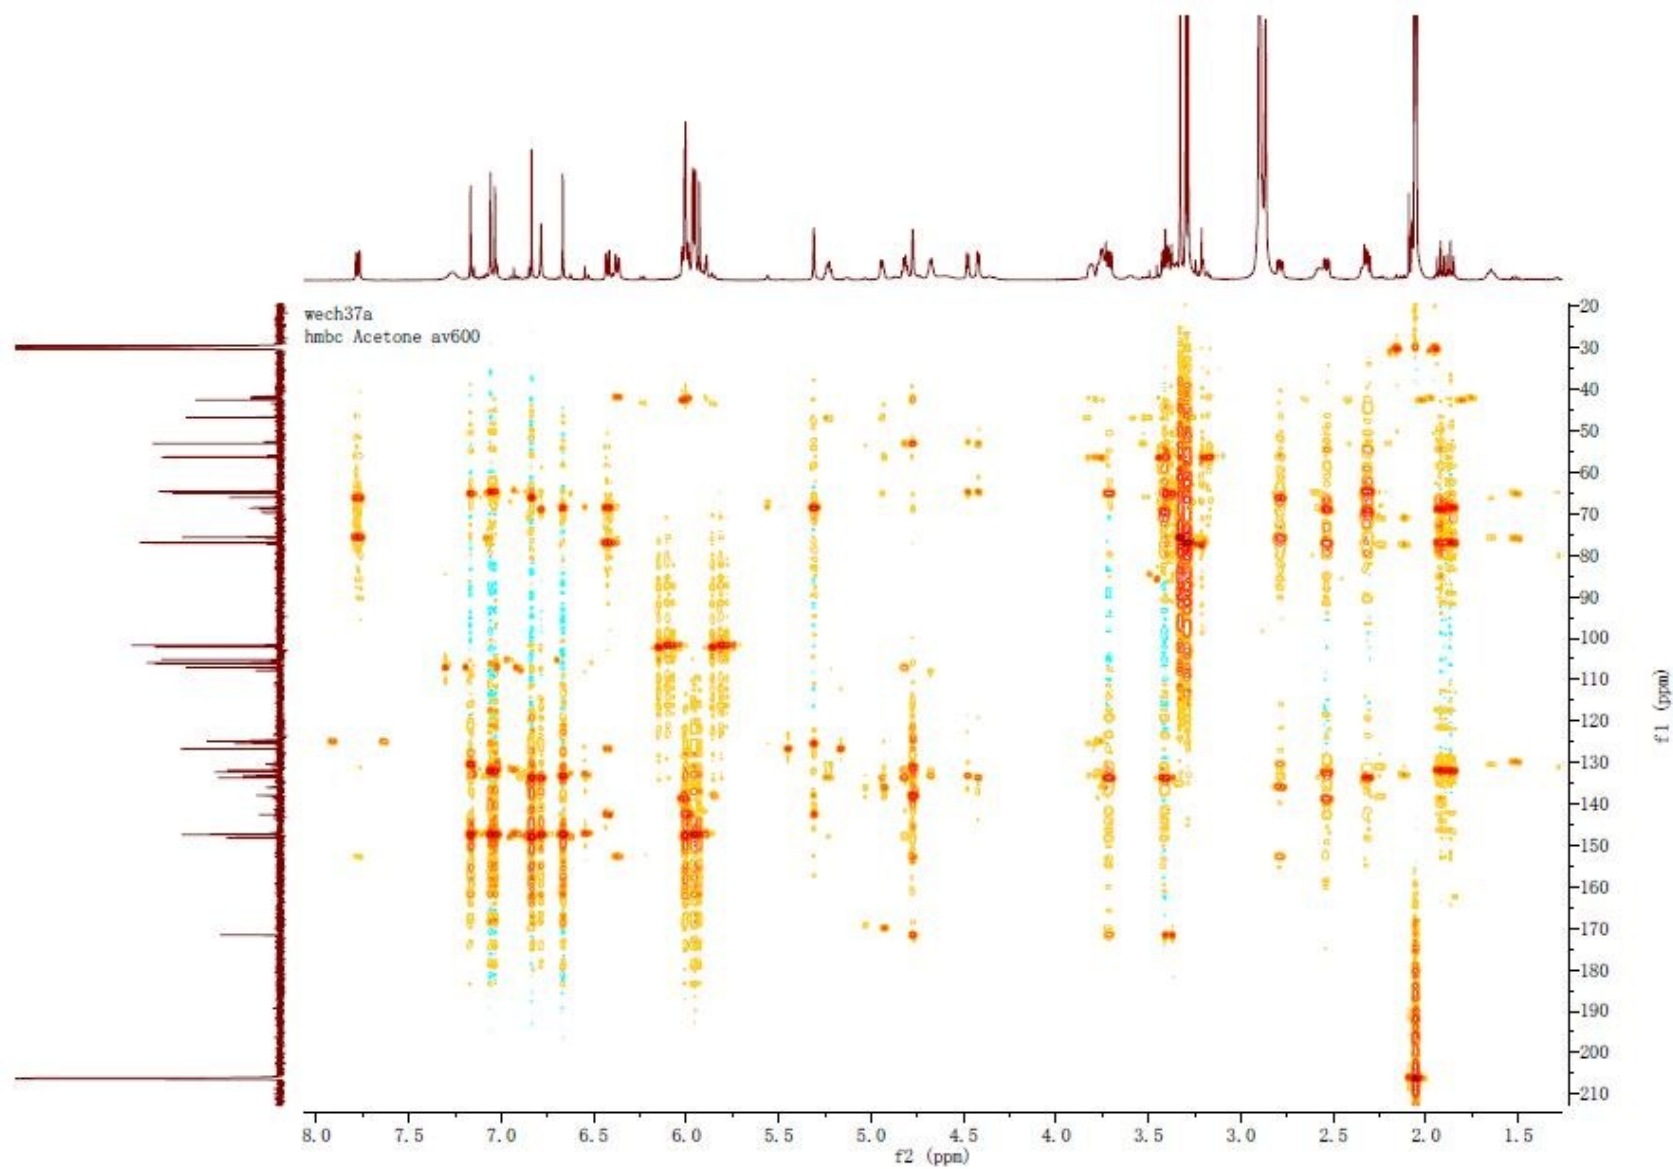

**Figure S17.** ROESY spectrum of erythrivarine E (**3**)

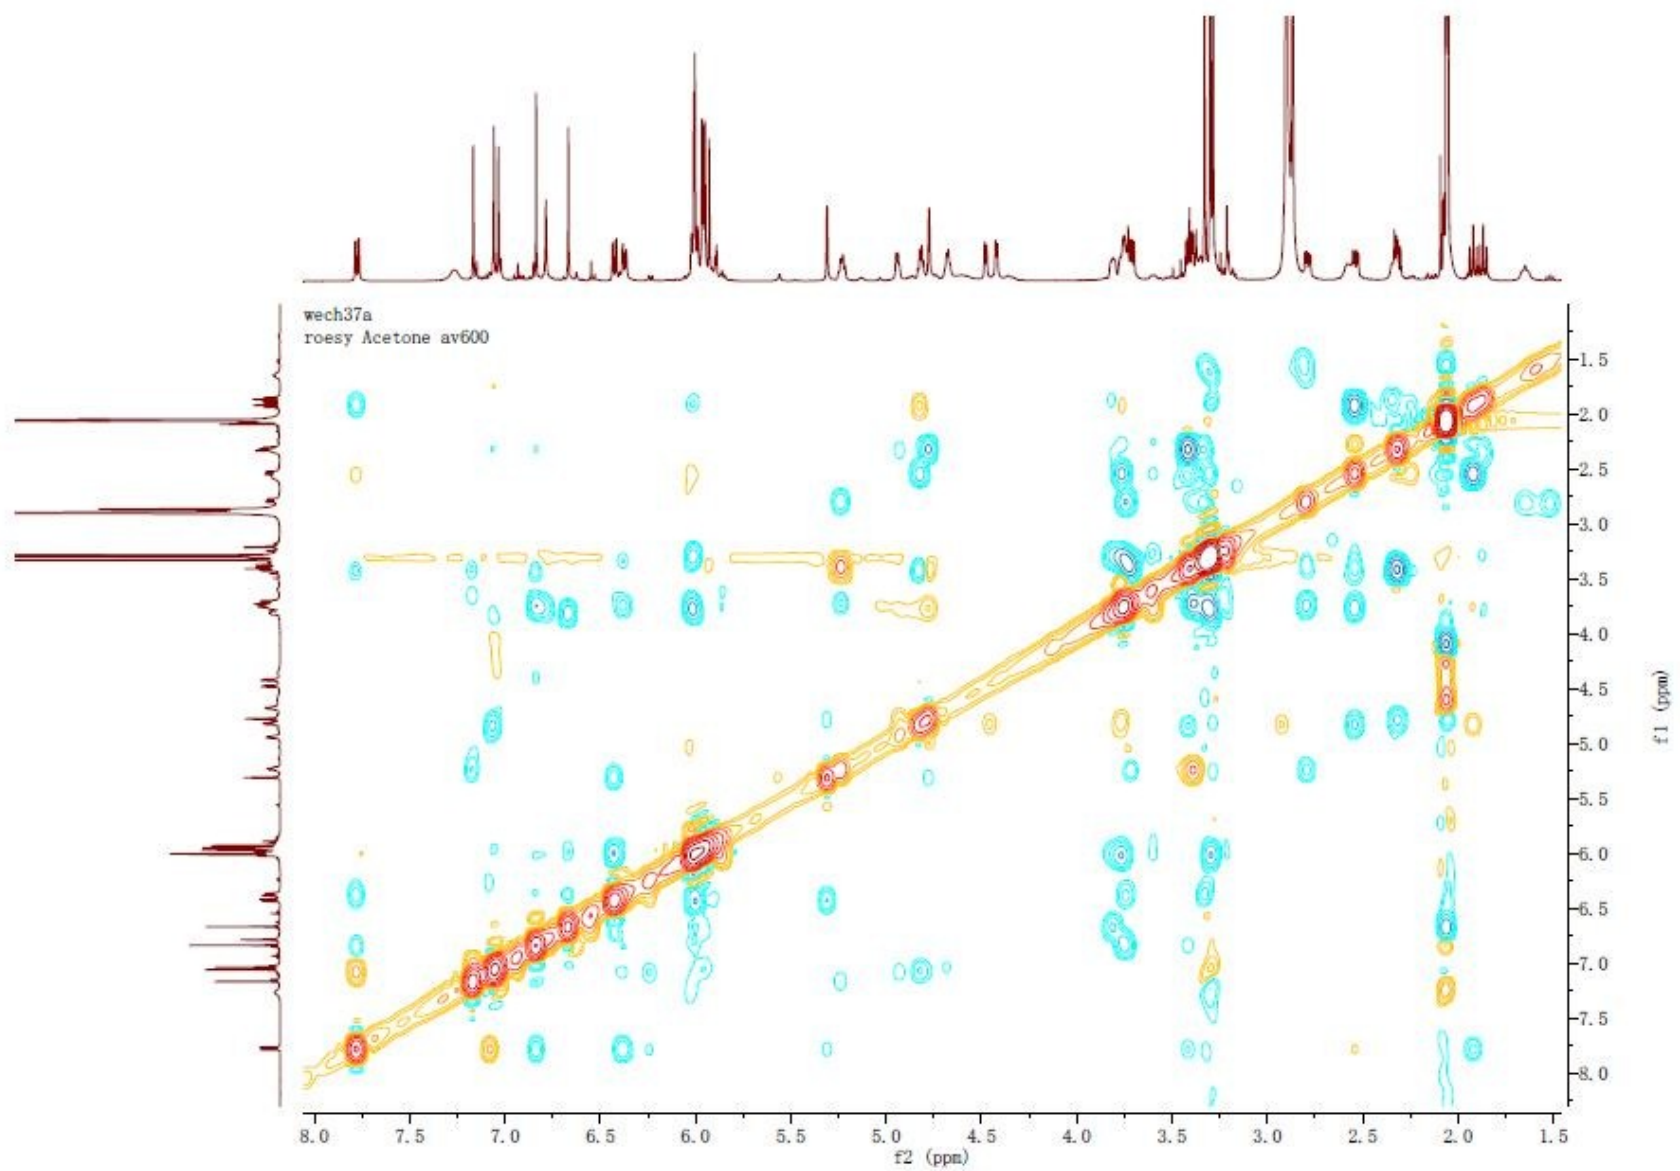



Figure S18. <sup>1</sup>H NMR spectrum of erythrivarine F (4)

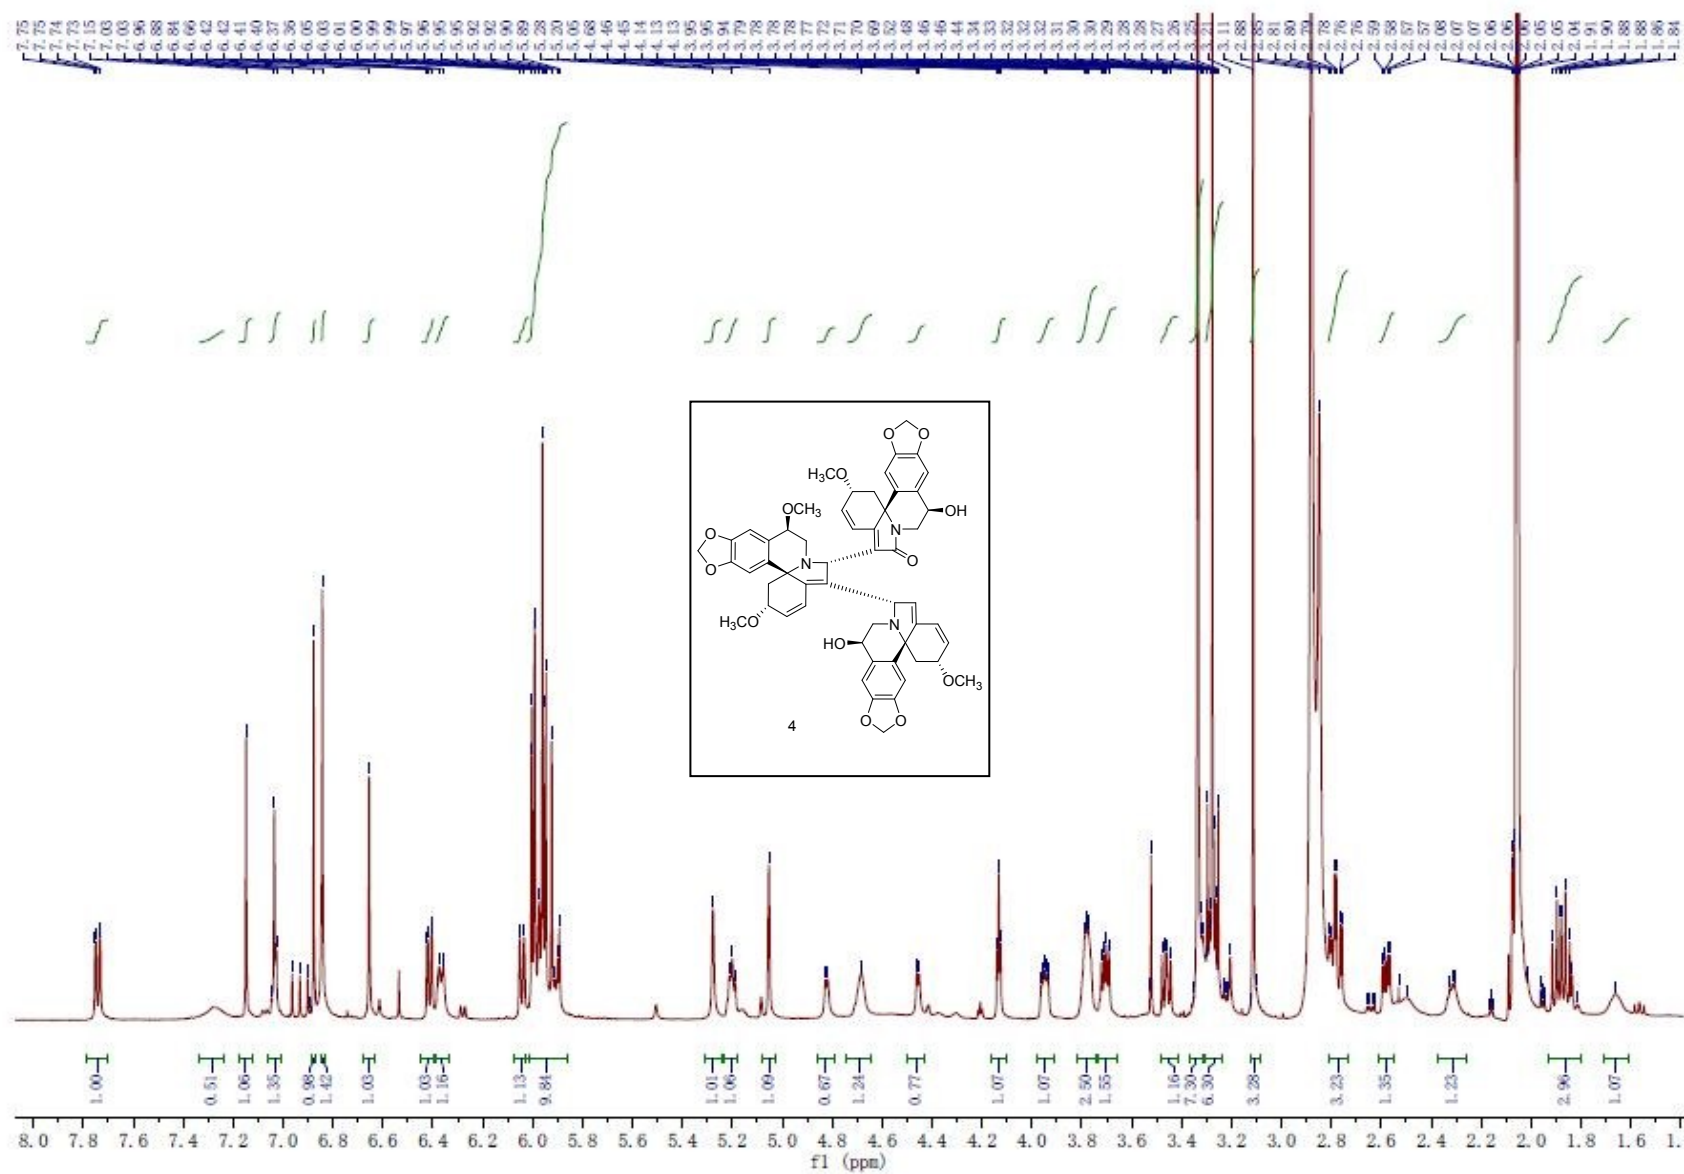

Expanded  $^1\text{H}$  NMR spectrum of erythrivarine F (4)

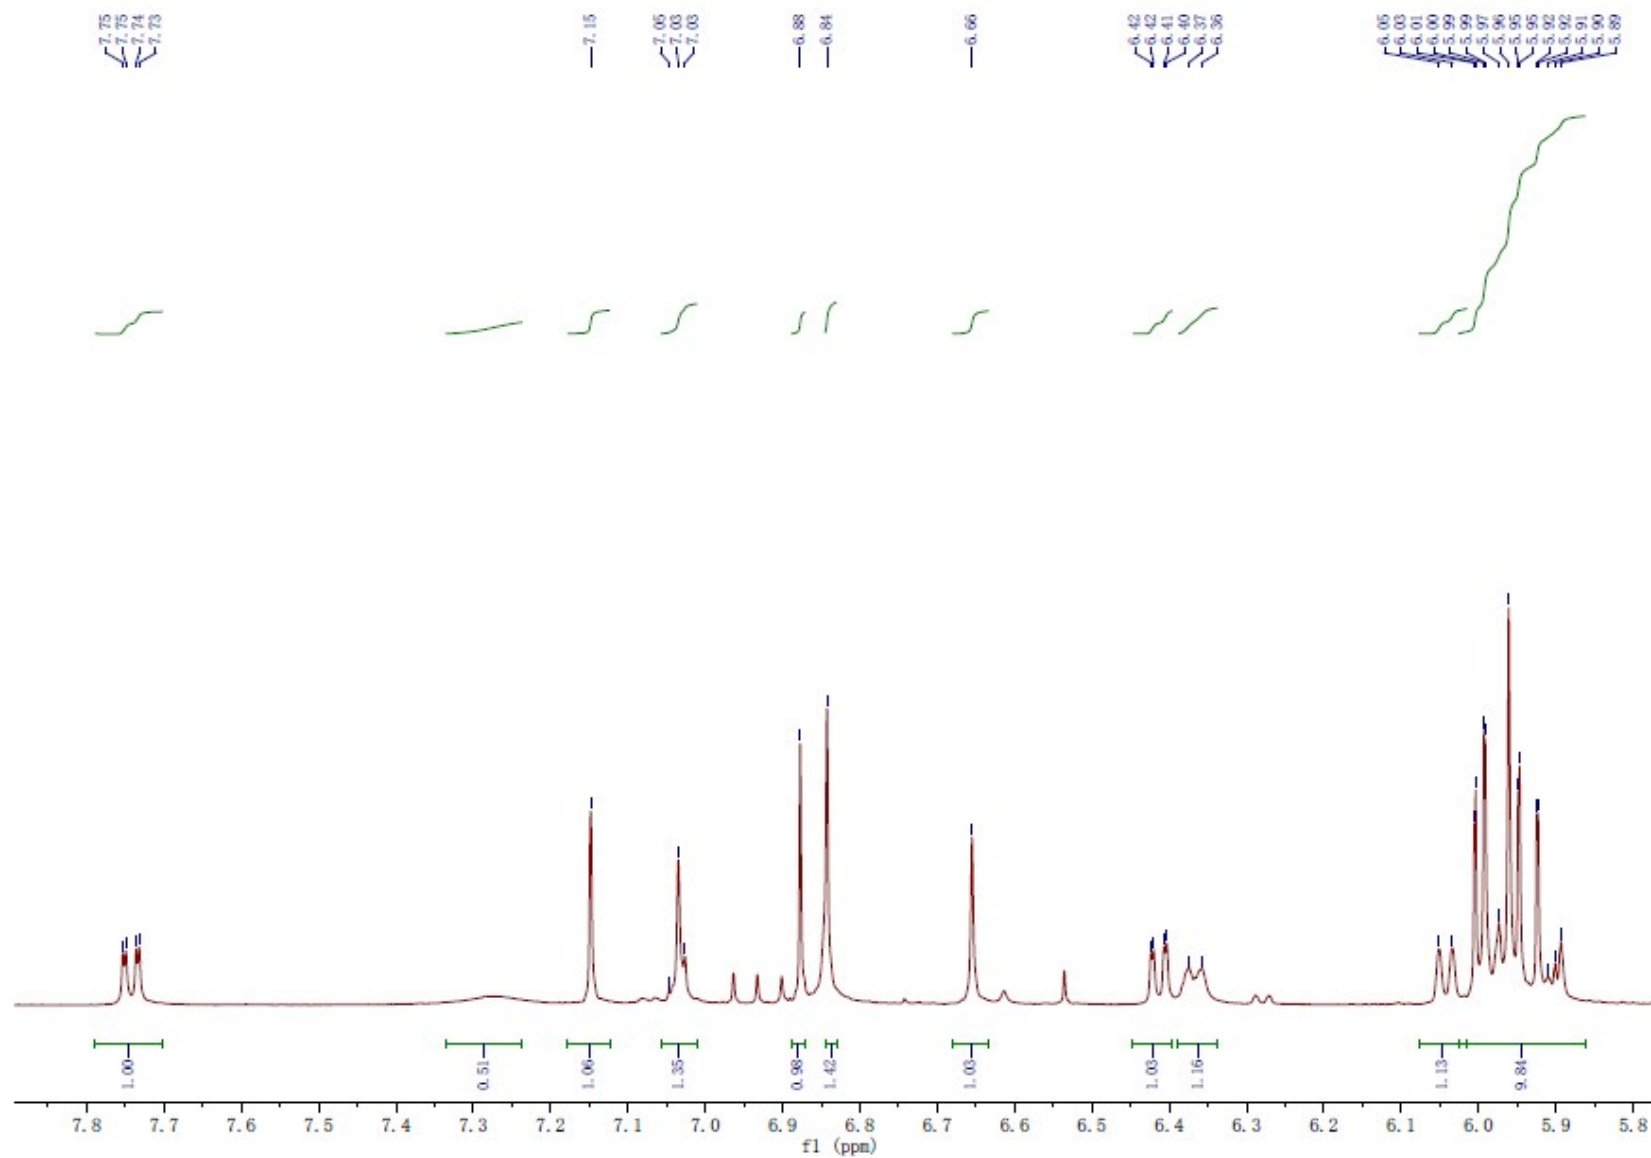

Figure S19. <sup>13</sup>C NMR spectrum of erythrivarine F (4)

wech43

d135 Acetone F:\ nmr 25

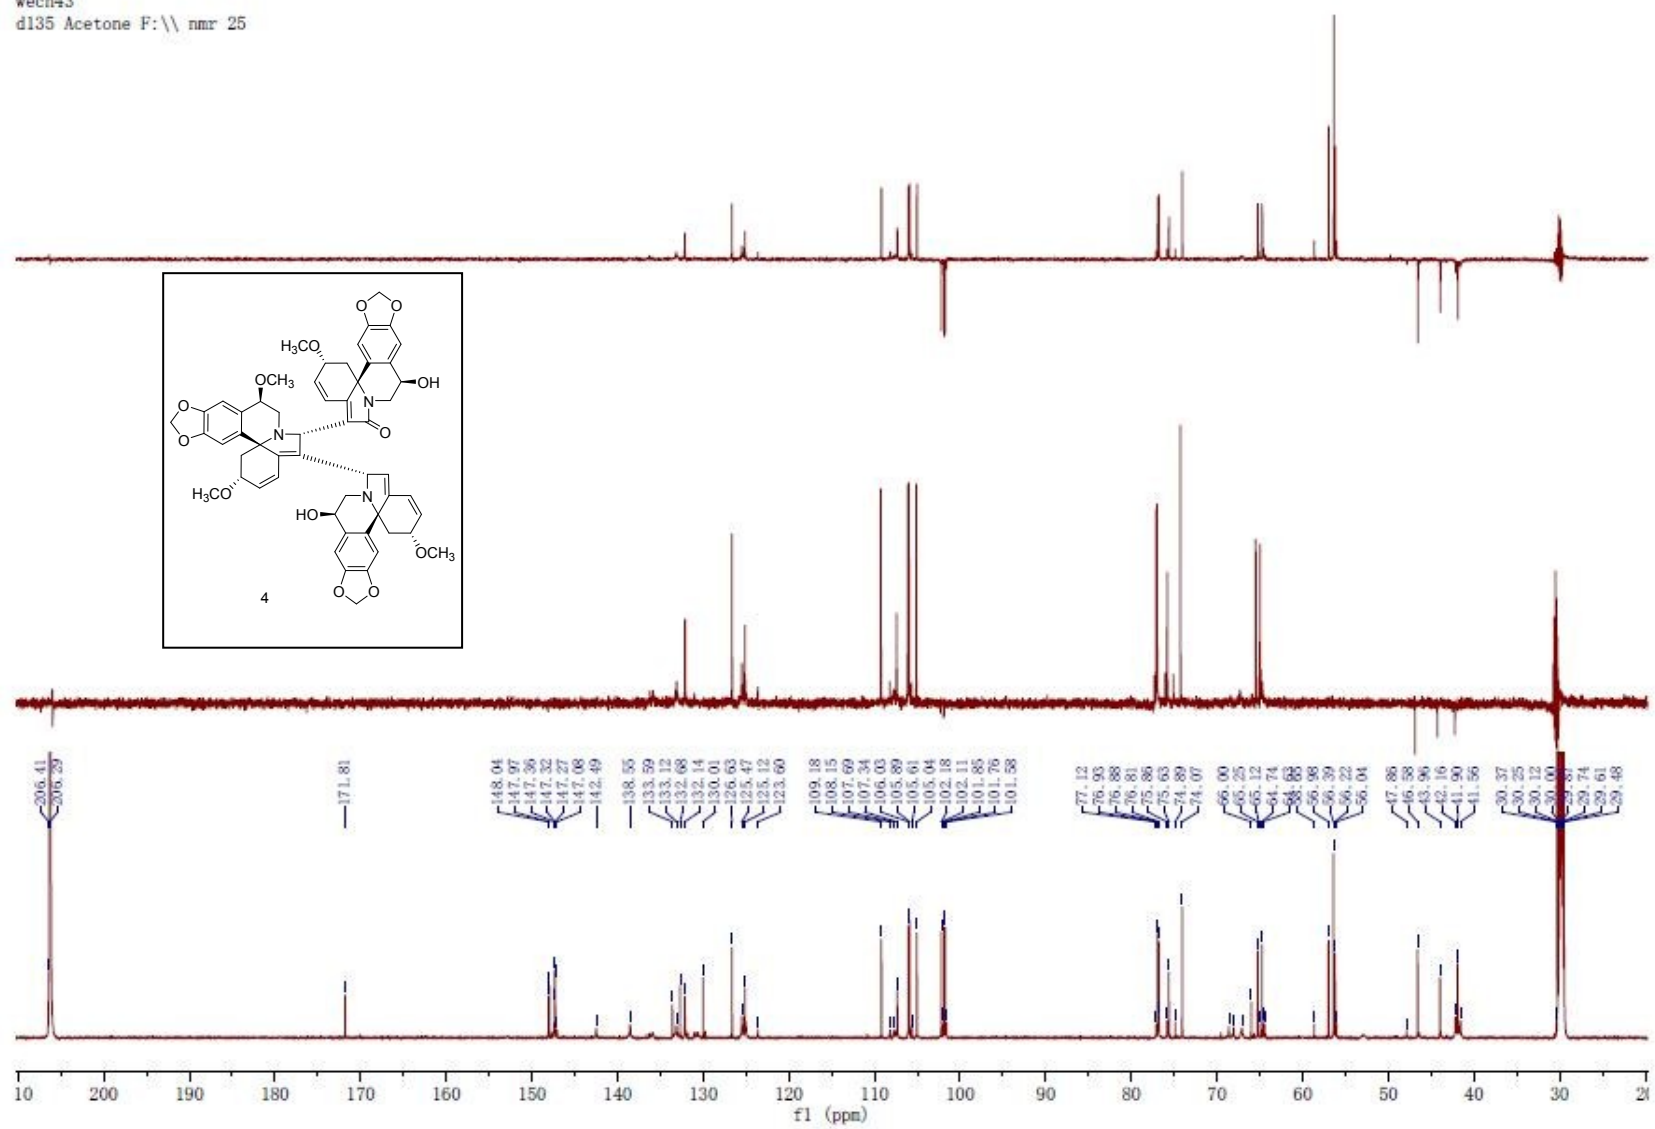

**Figure S20.** HSQC spectrum of erythrivarine F (4)

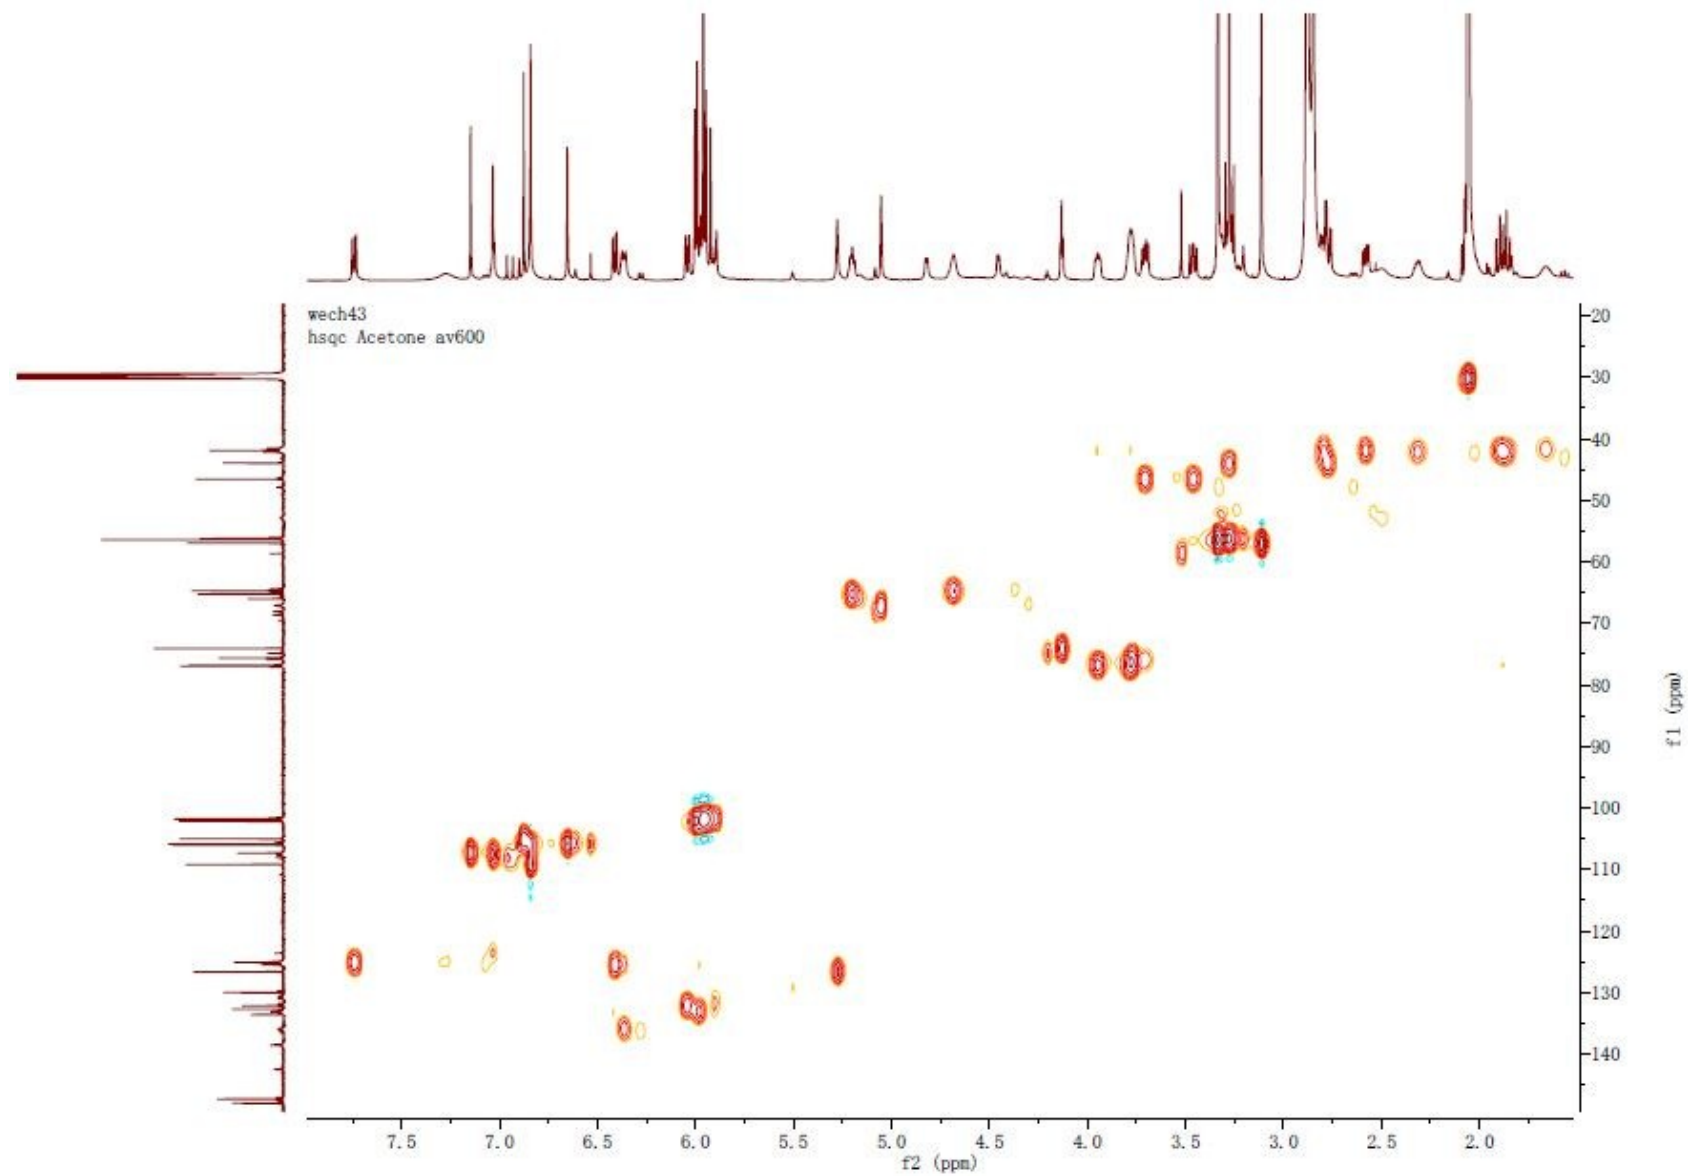

Expanded HSQC spectrum of erythrivarine F (4)

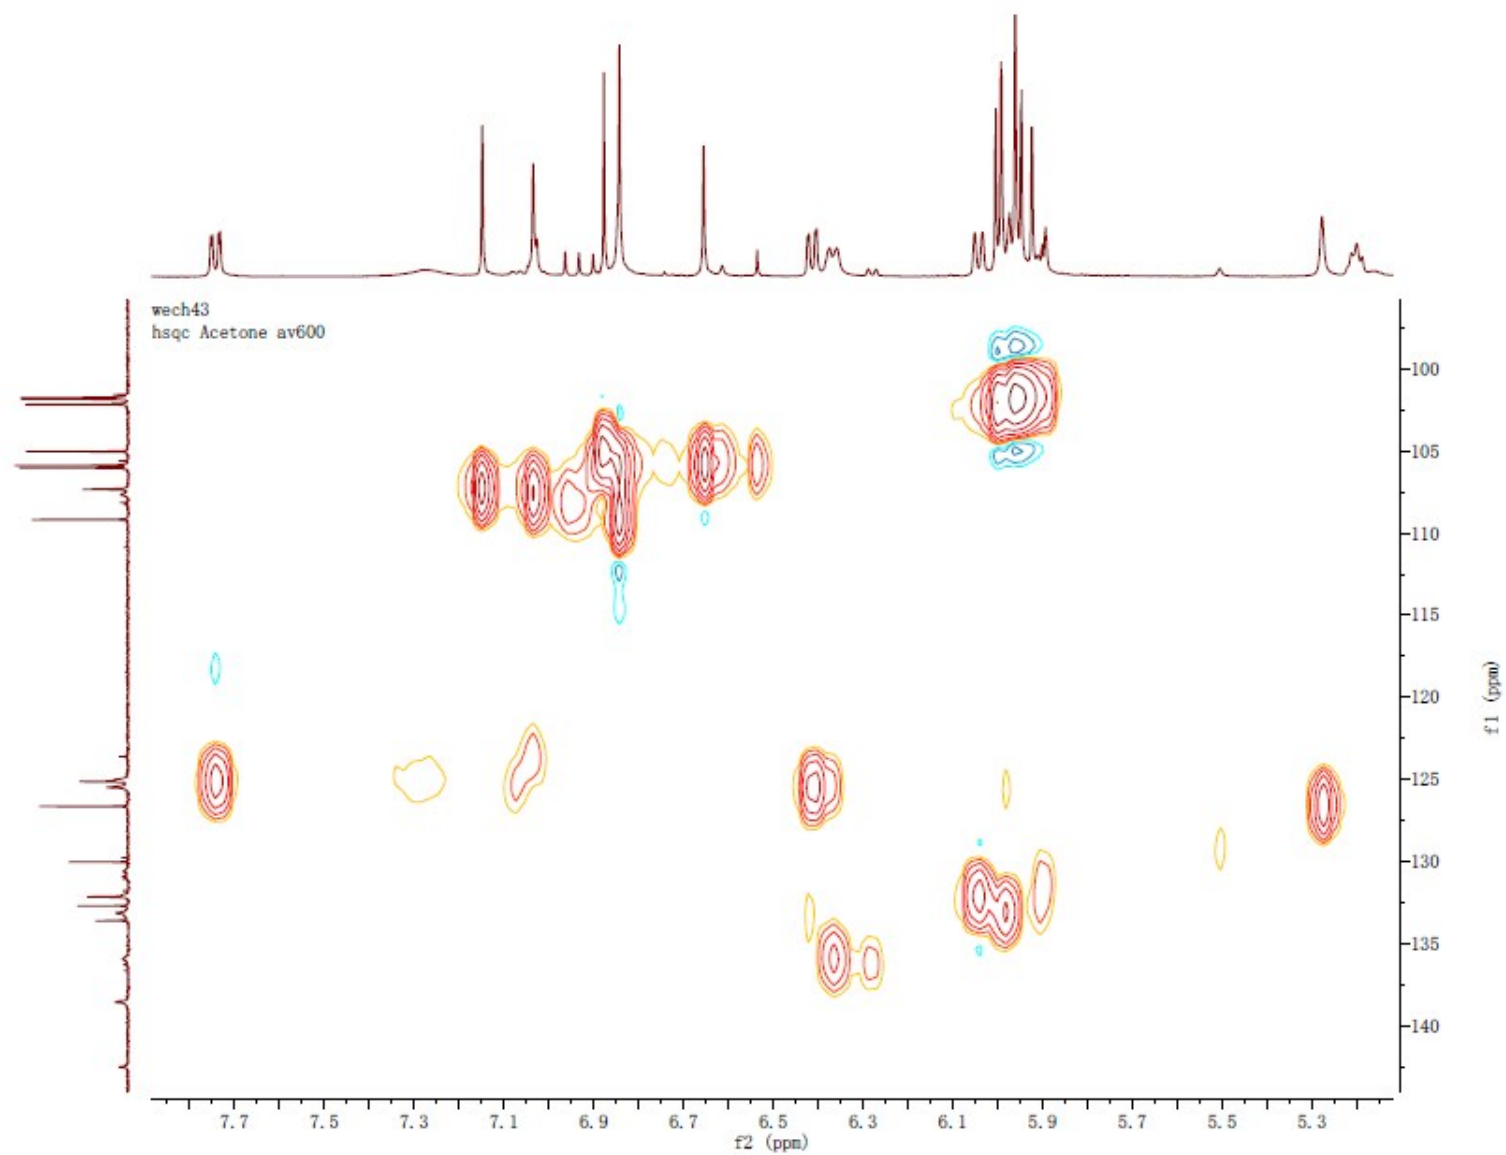

**Figure S21.** HMBC spectrum of erythrivarine F (4)

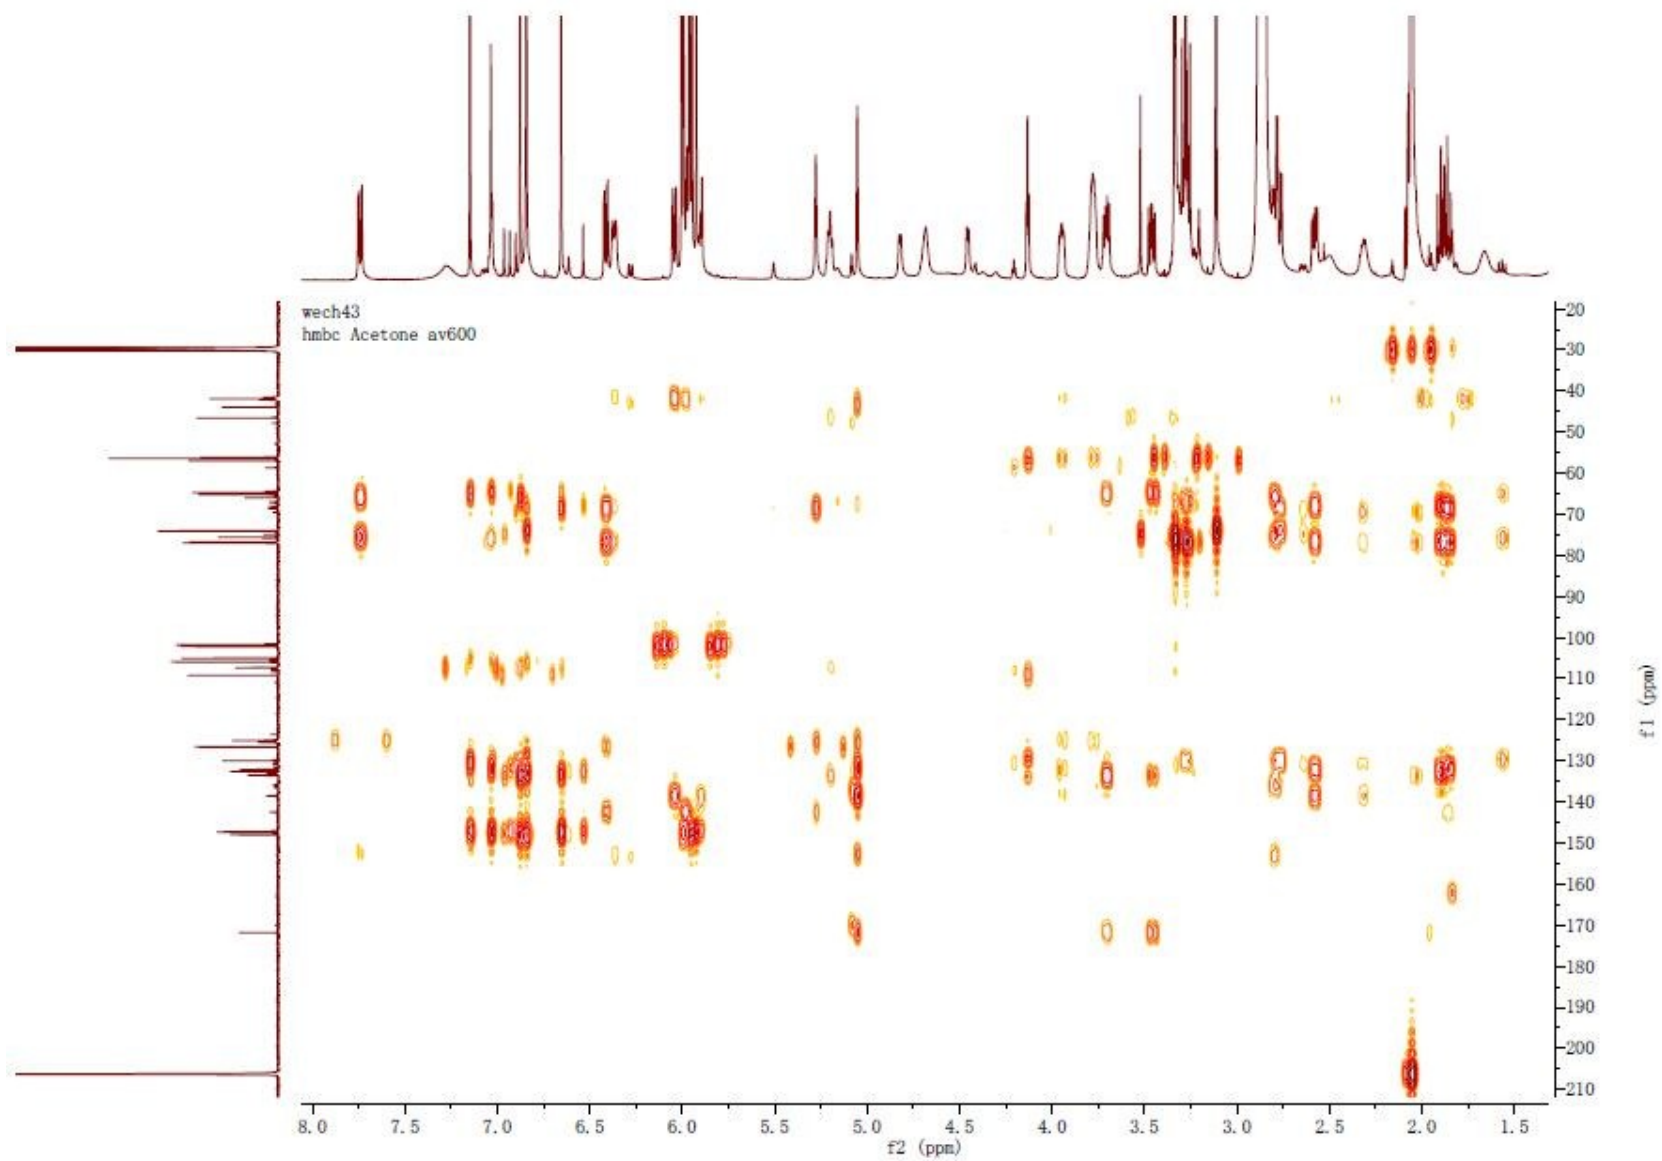

**Figure S22.**  $^1\text{H}$ - $^1\text{H}$  COSY spectrum of erythrivarine F (4)

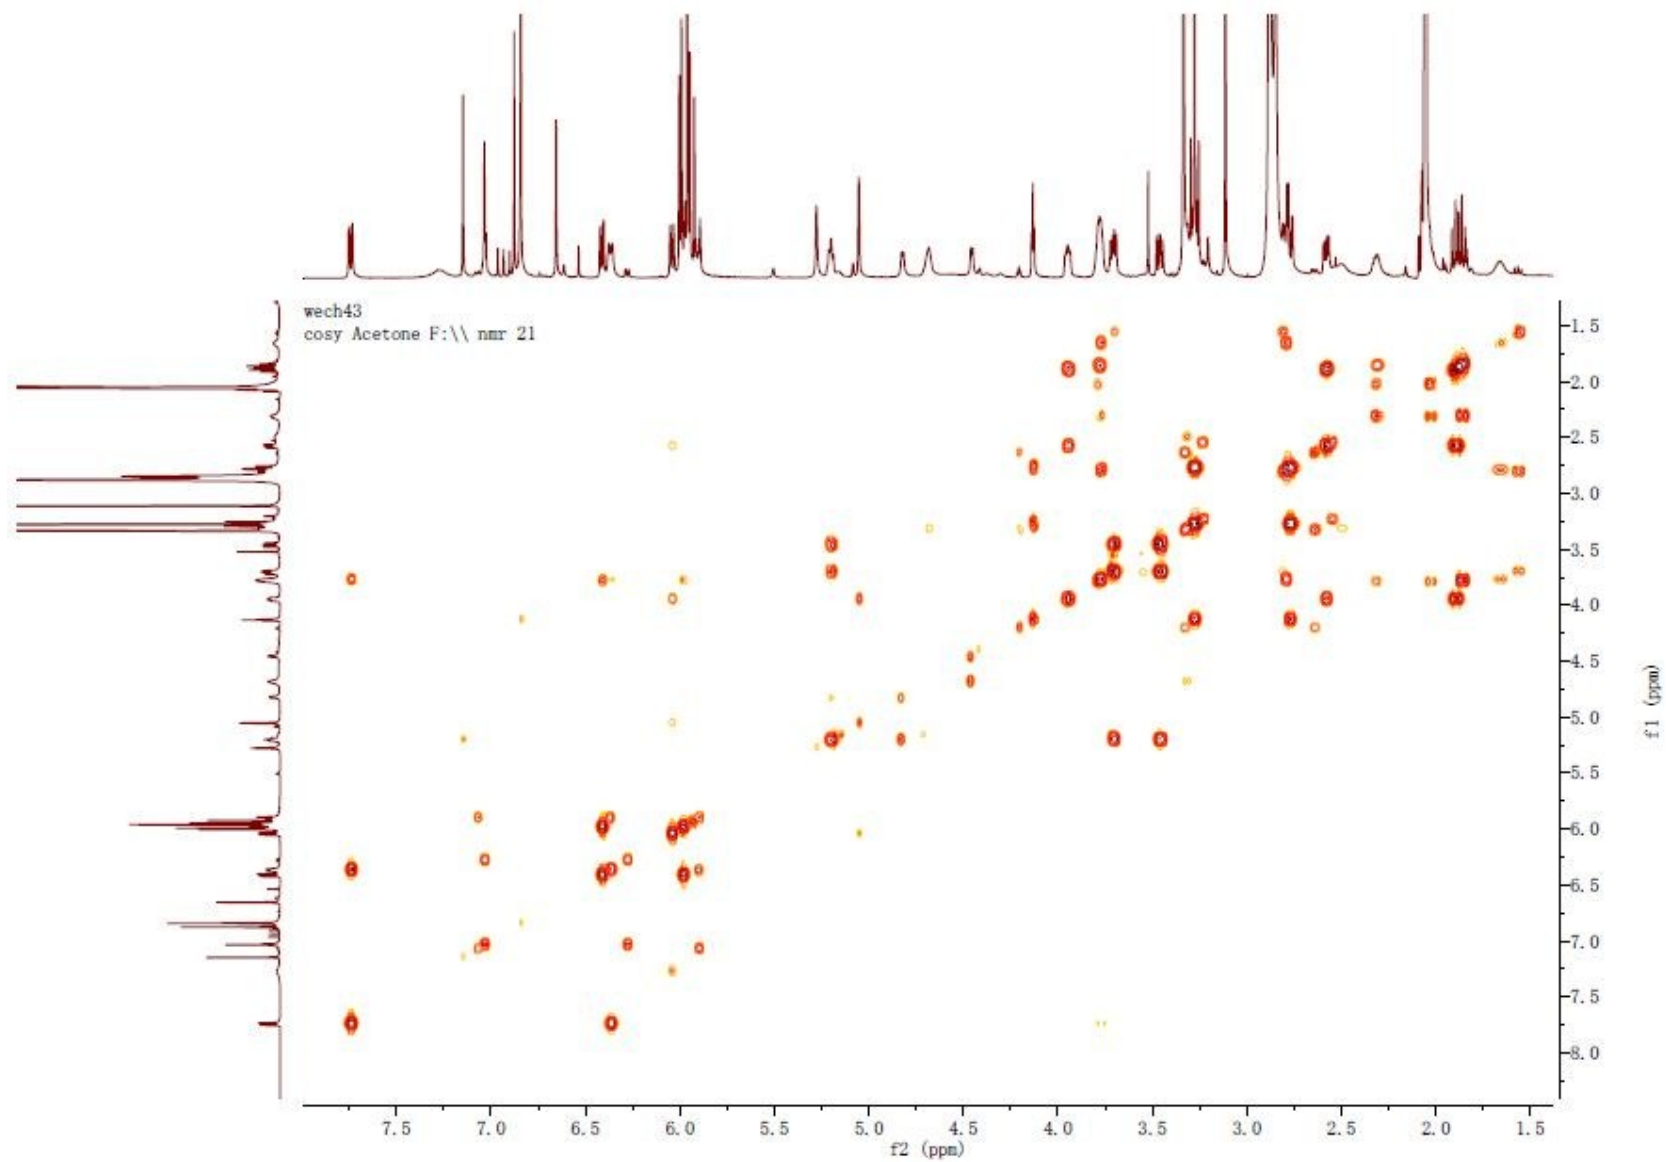



**Figure S23.** ROESY spectrum of erythrivarine F (4)

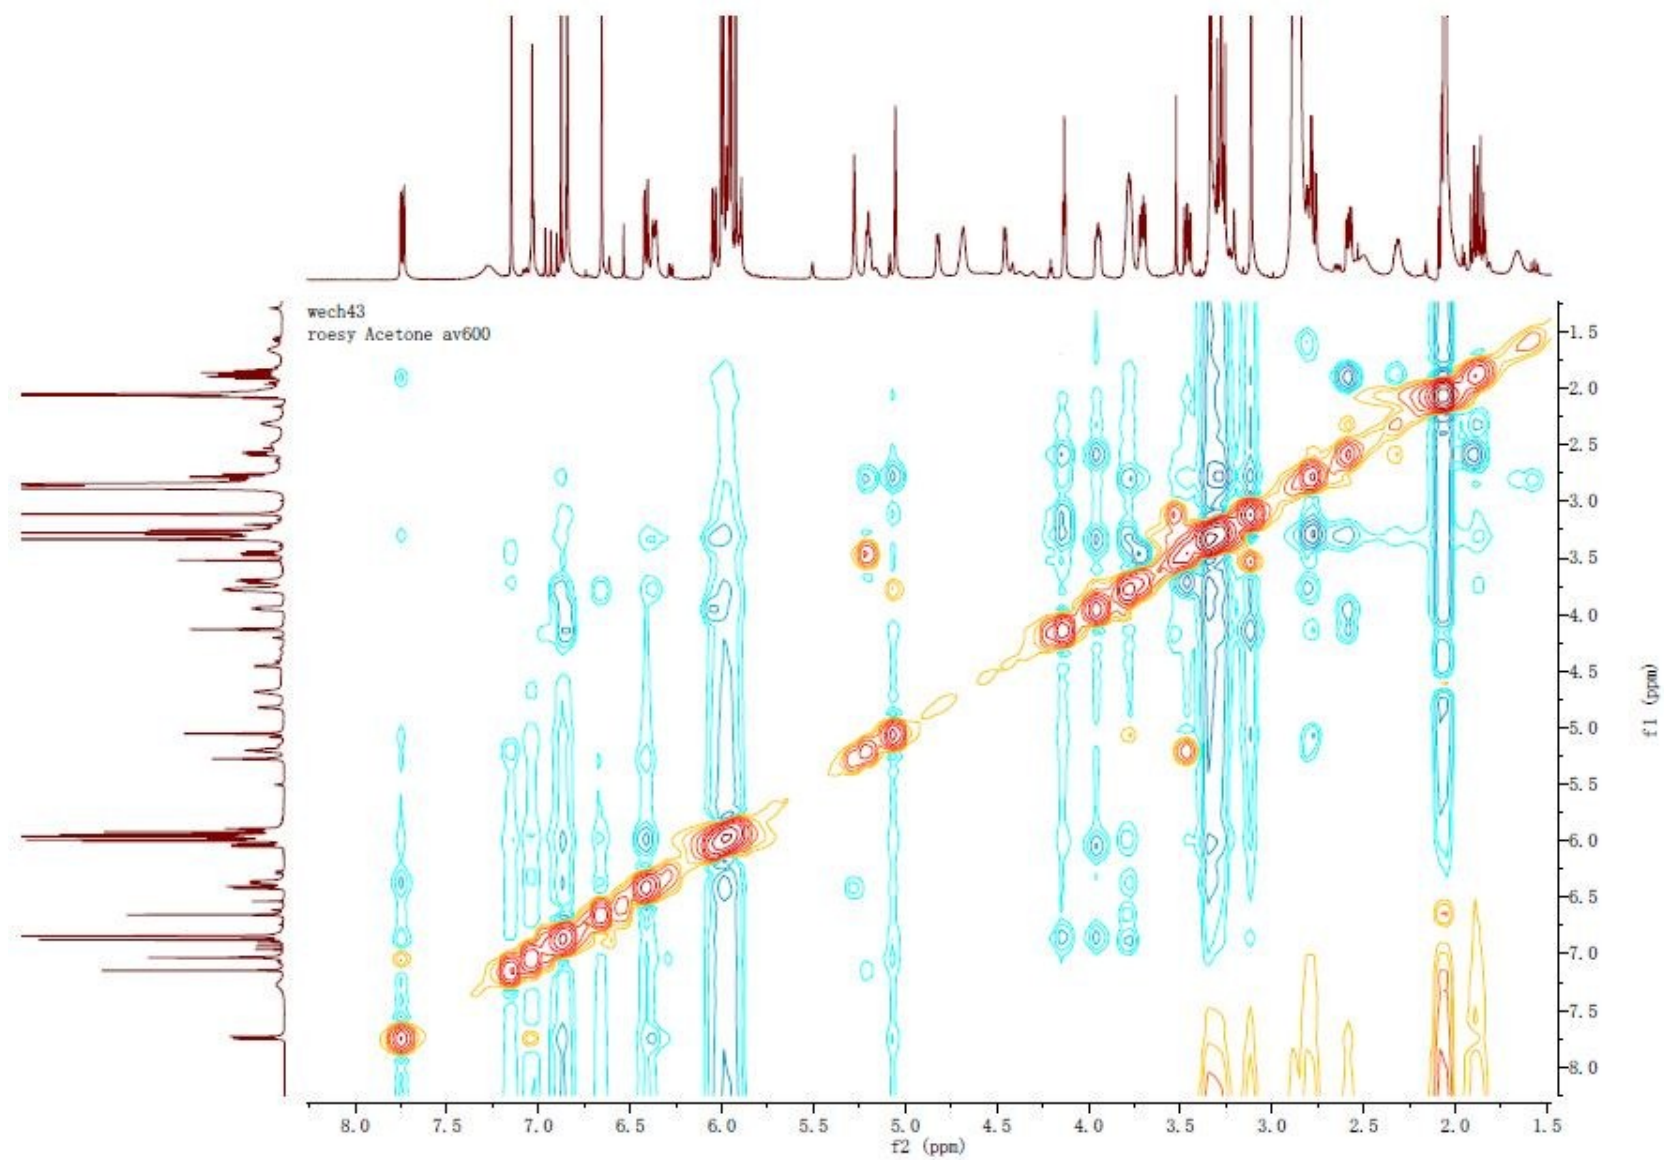



Figure S24. <sup>1</sup>H NMR spectrum of erythrivarine G (5)

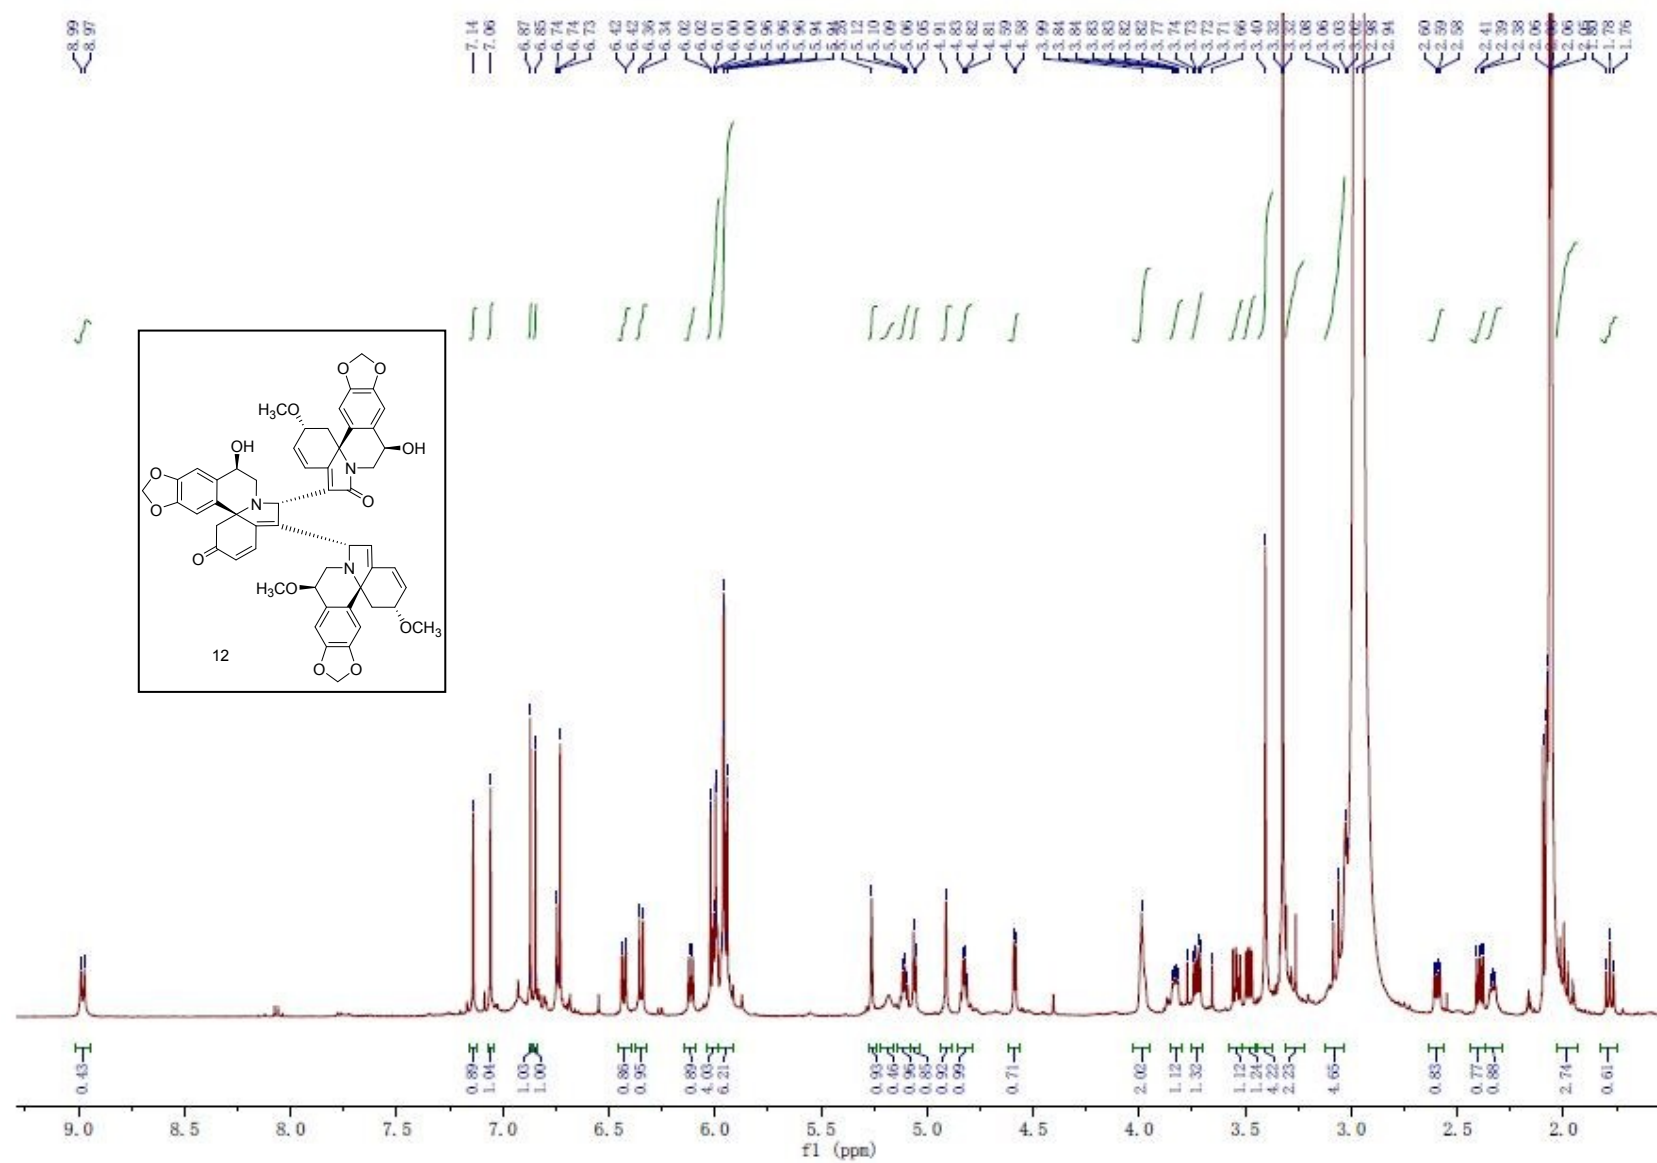

Expanded  $^1\text{H}$  NMR spectrum of erythrivarine G (5)

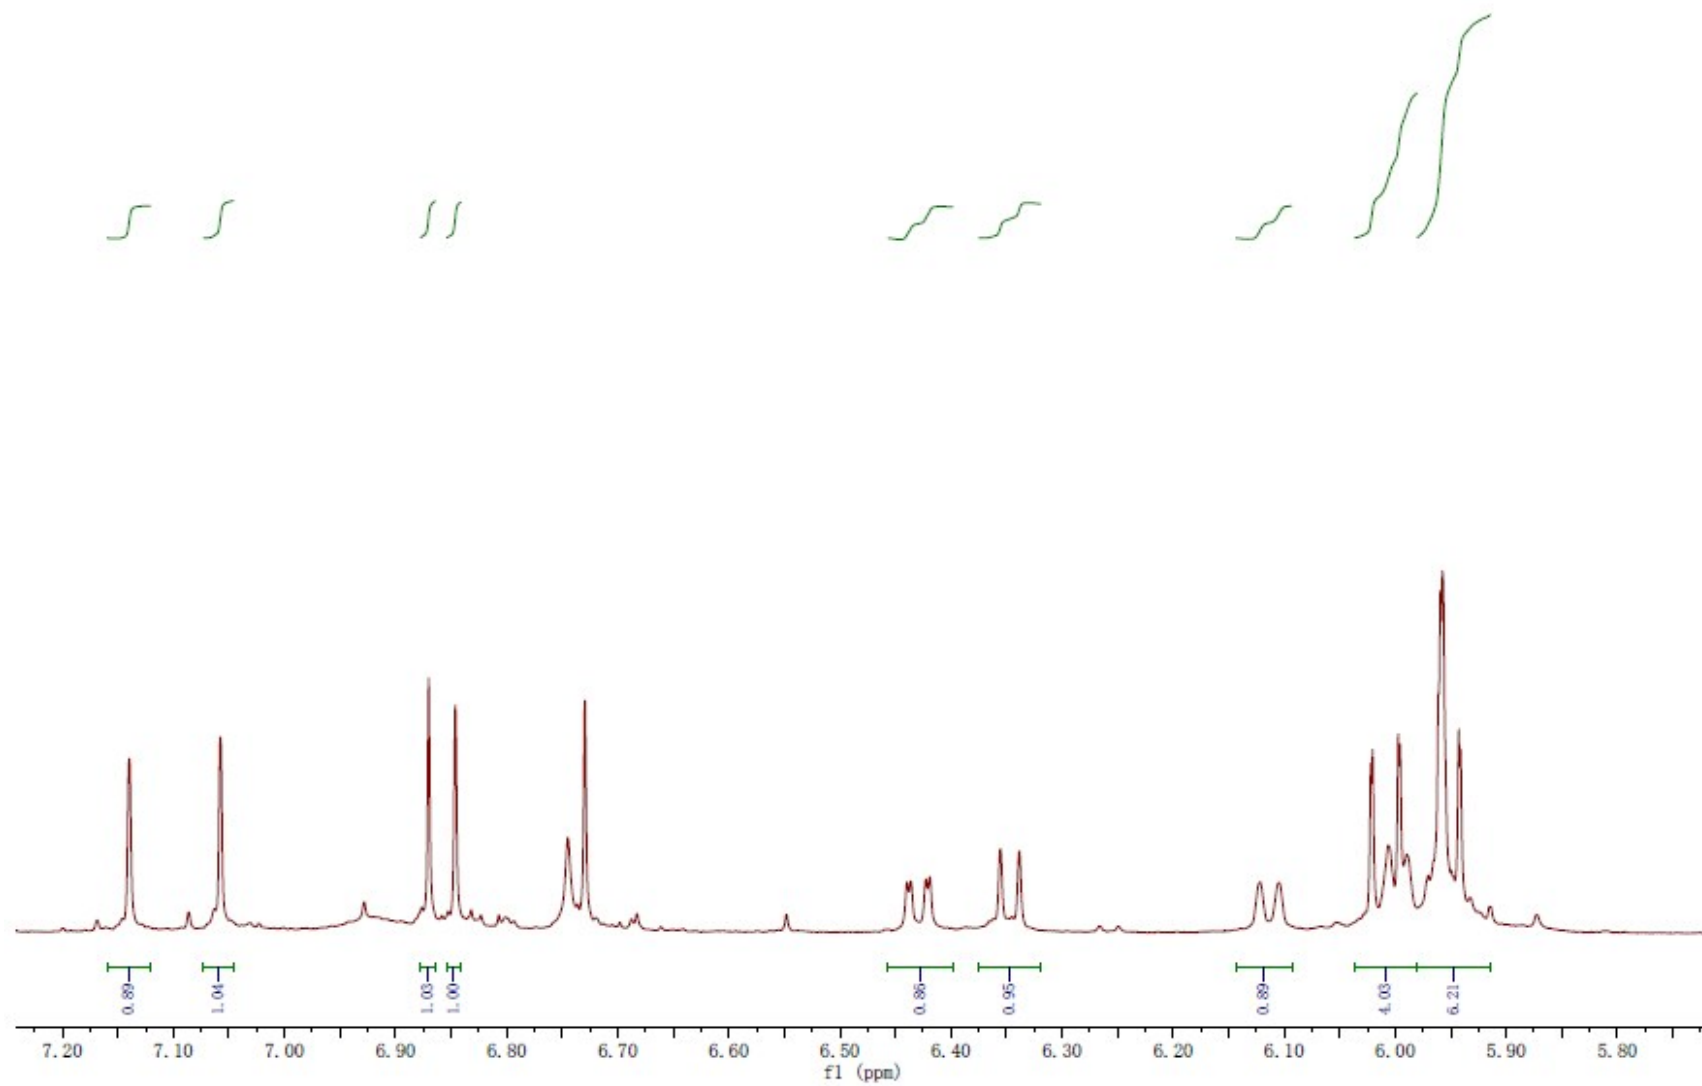

Figure S25.  $^{13}\text{C}$  NMR spectrum of erythrivarine G (5)

wech41  
d135 Acetone F:\ nmr 58

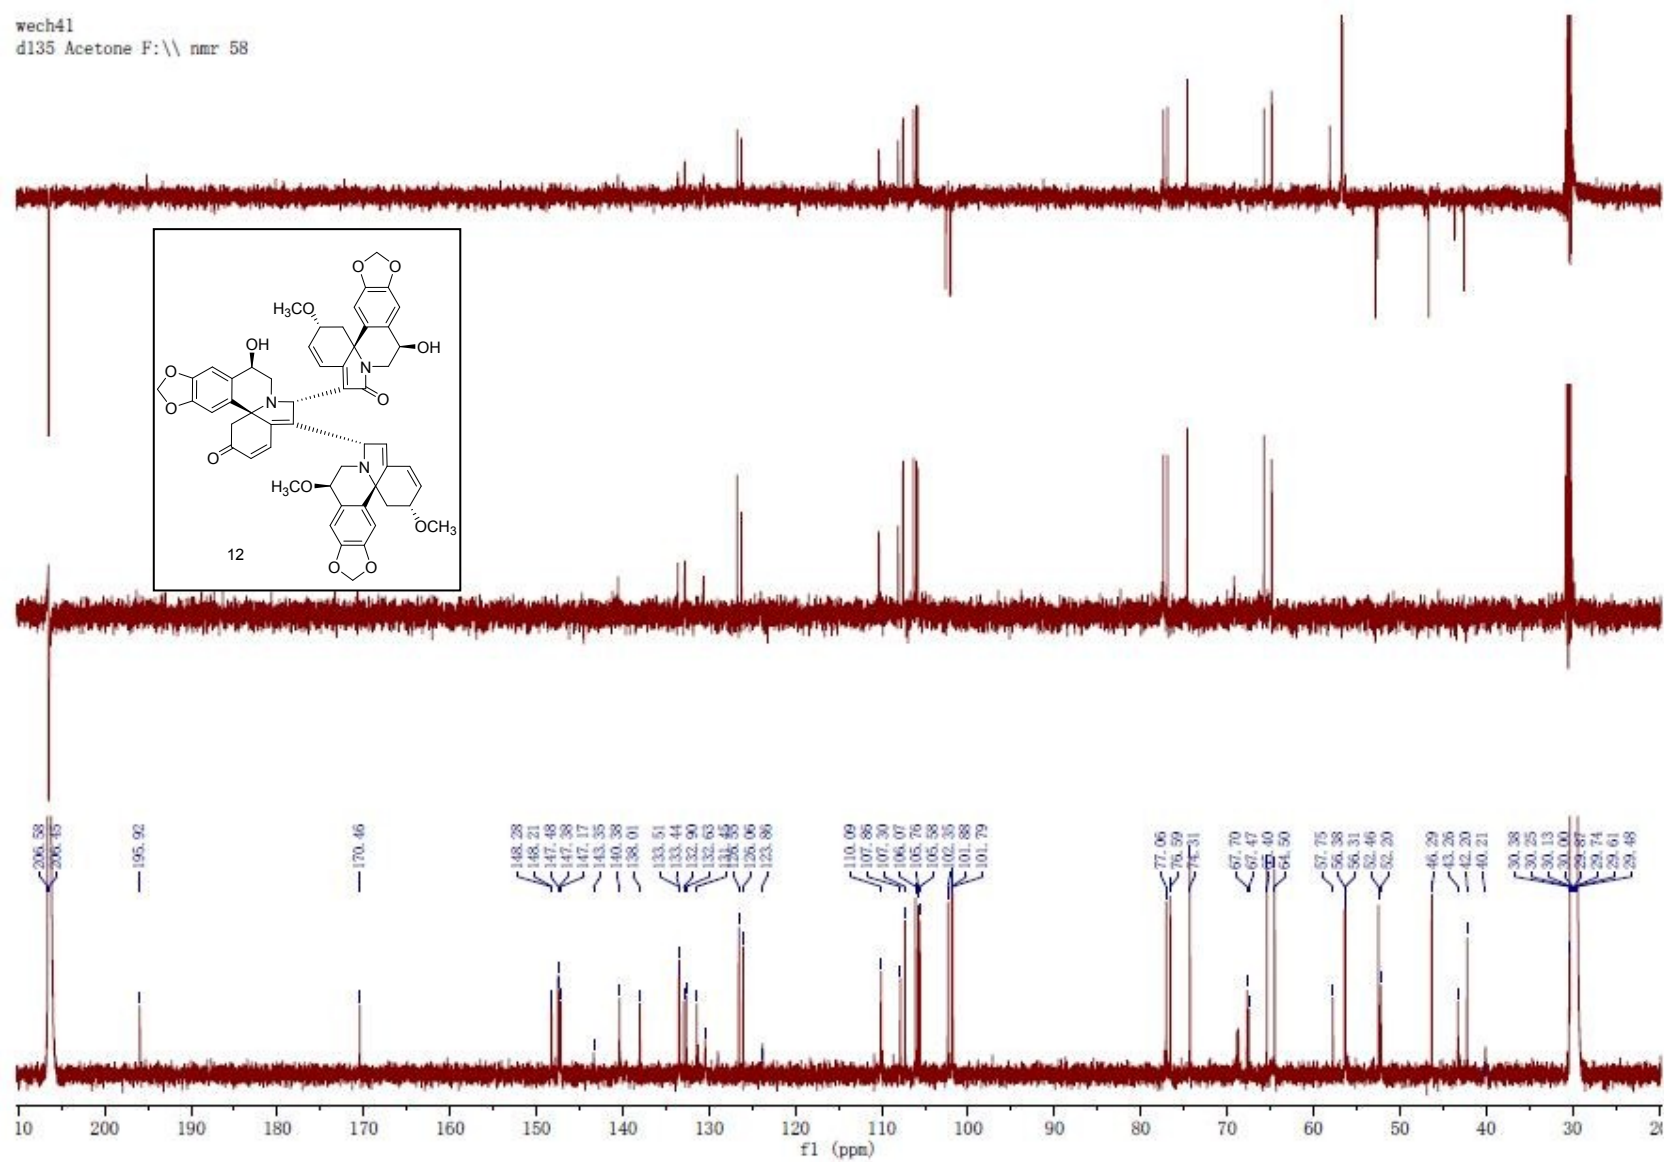

**Figure S26.** HSQC spectrum of erythrivarine G (**5**)

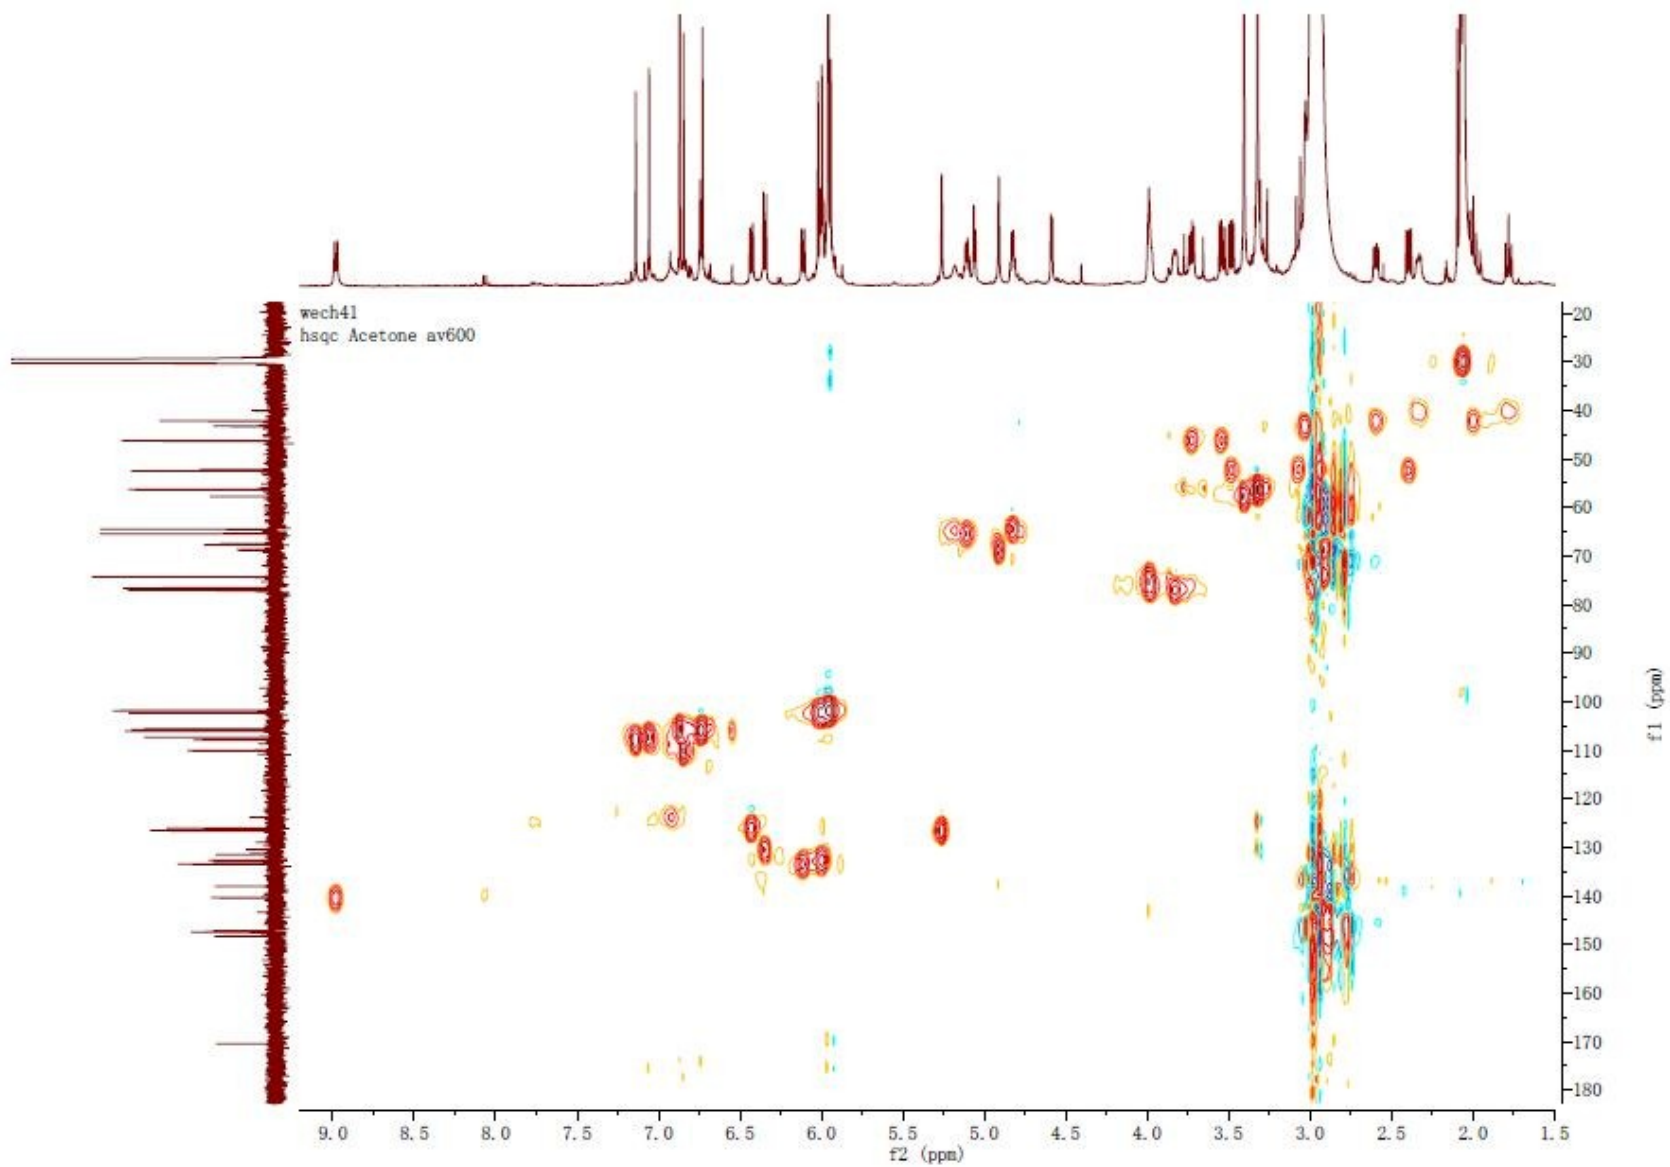

Expanded HSQC spectrum of erythrivarine G (5)

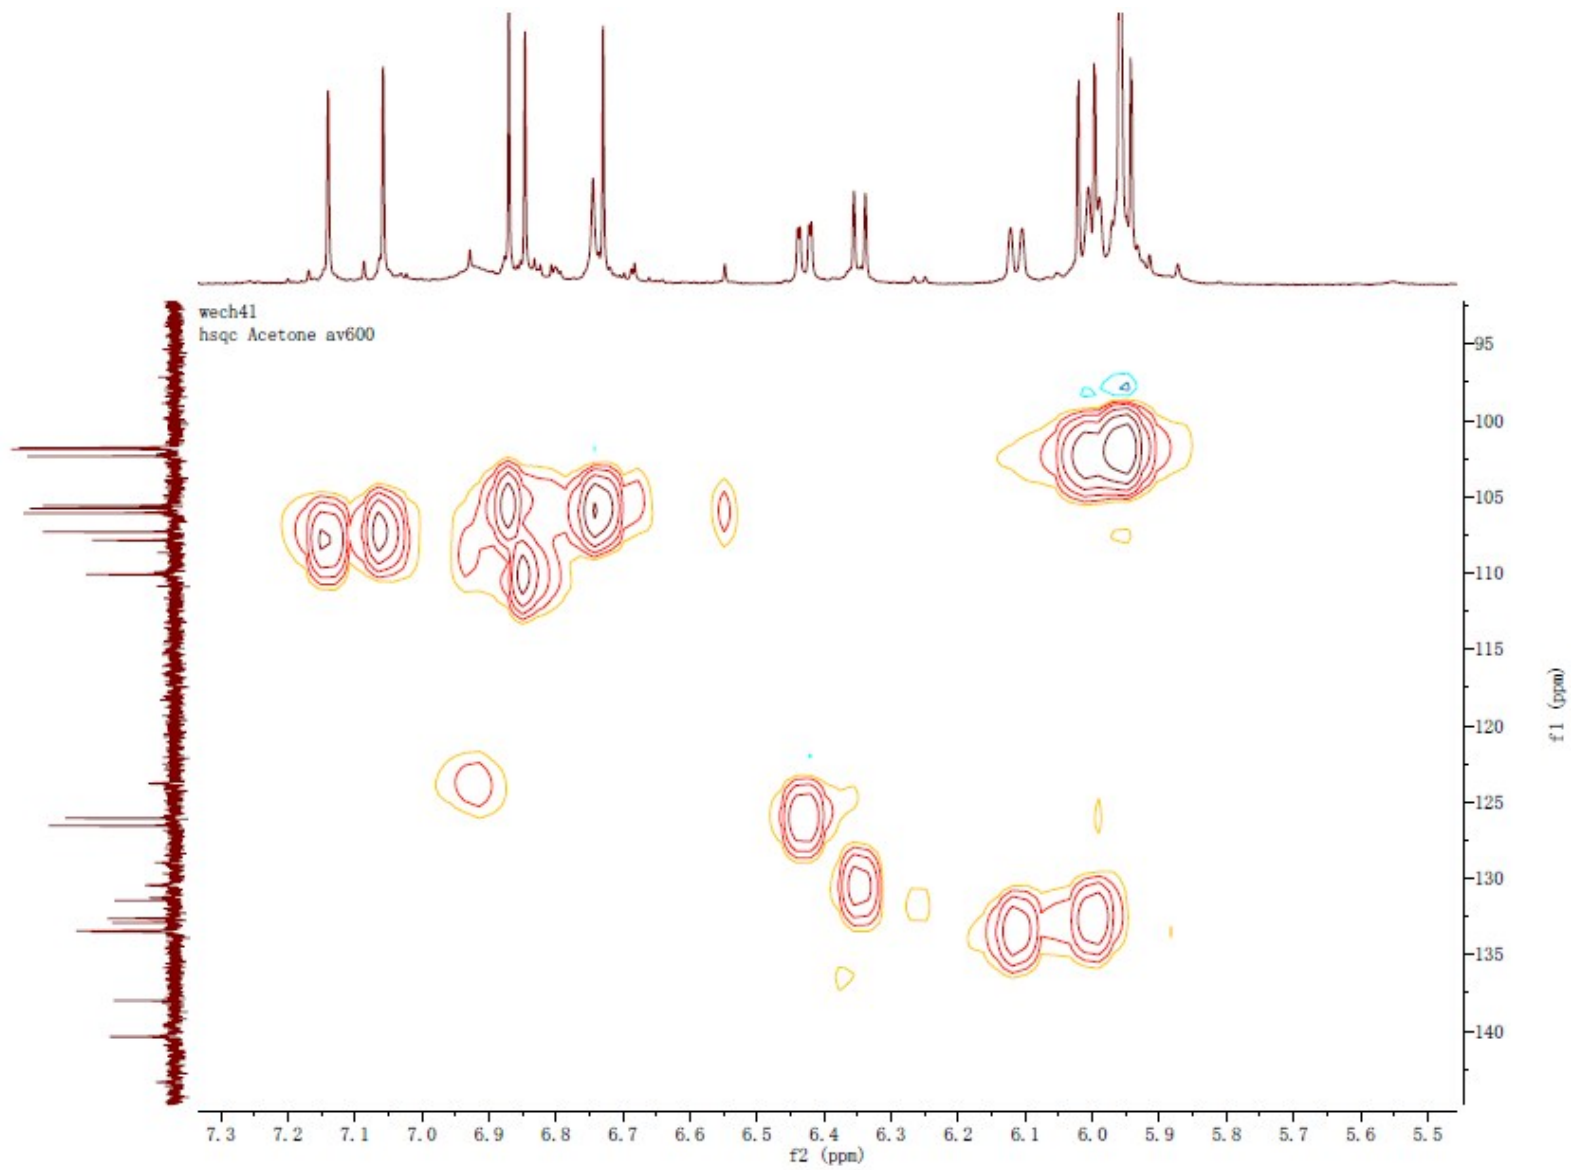

**Figure S27.** HMBC spectrum of erythrivarine G (**5**)

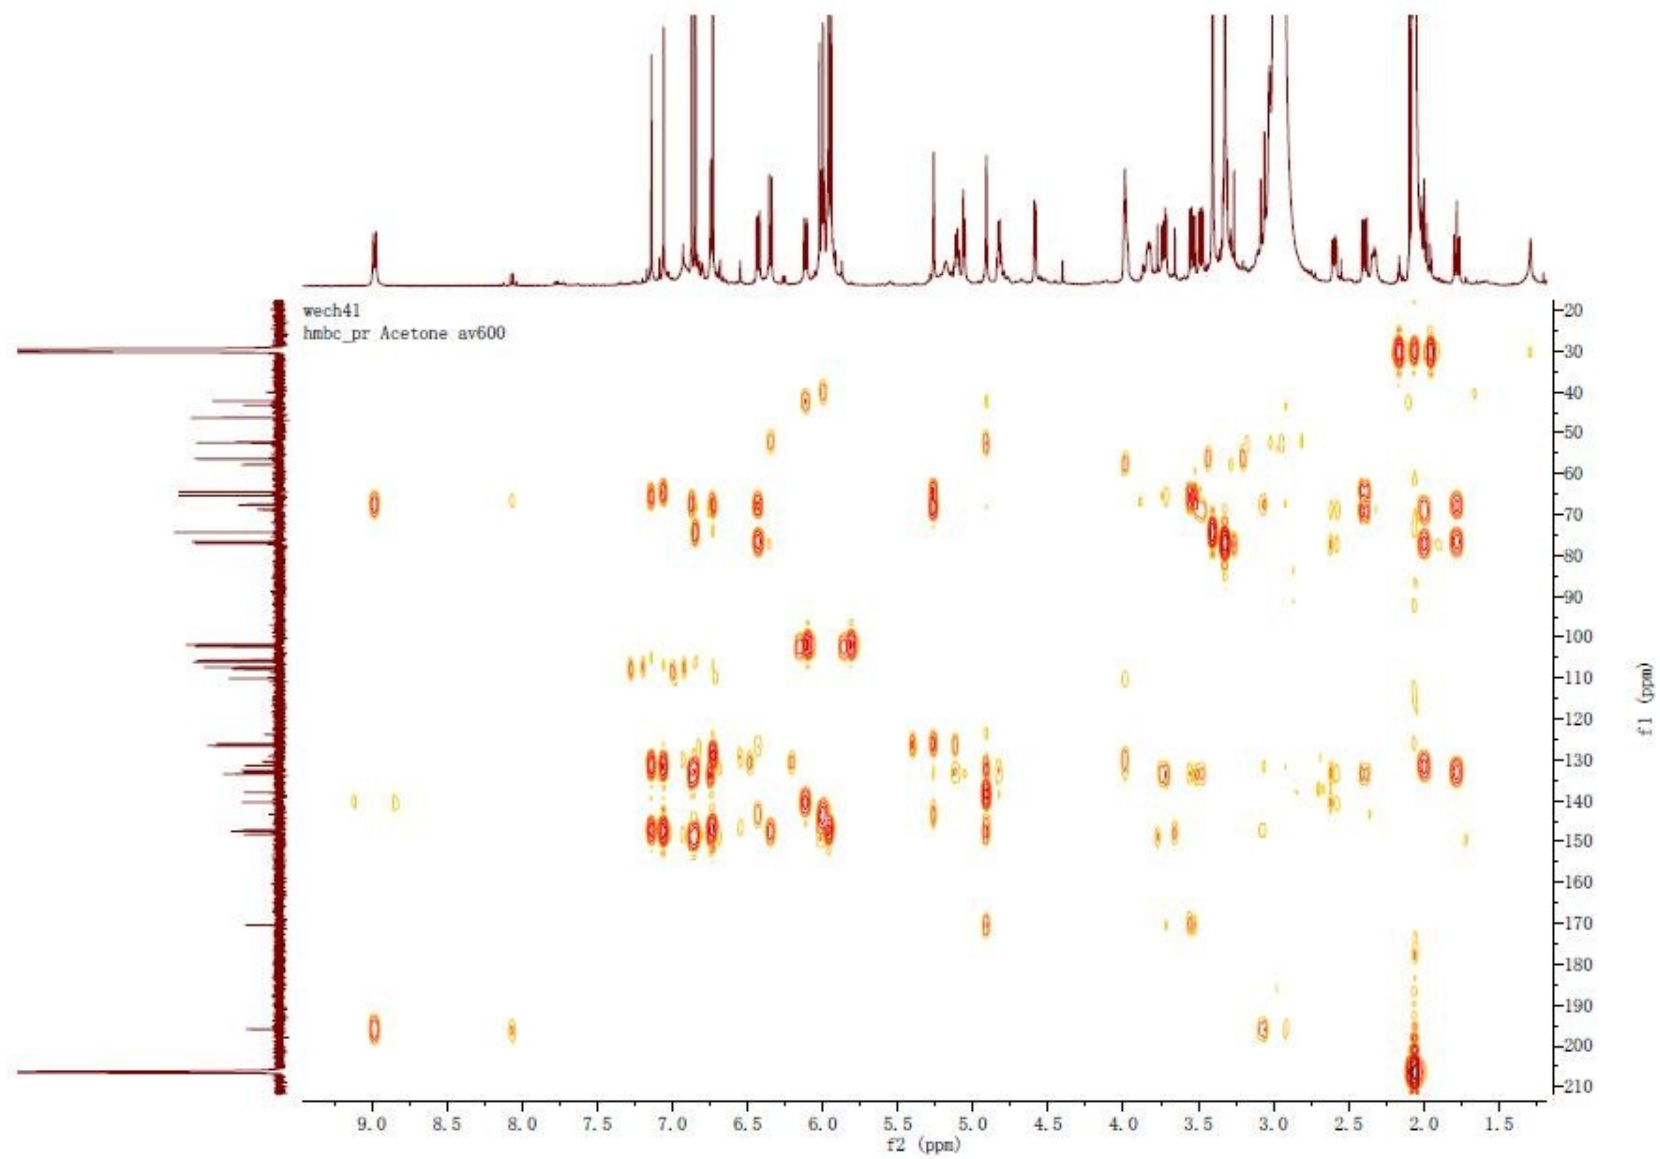



**Figure S28.**  $^1\text{H}$ - $^1\text{H}$  COSY spectrum of erythrivarine G (**5**)

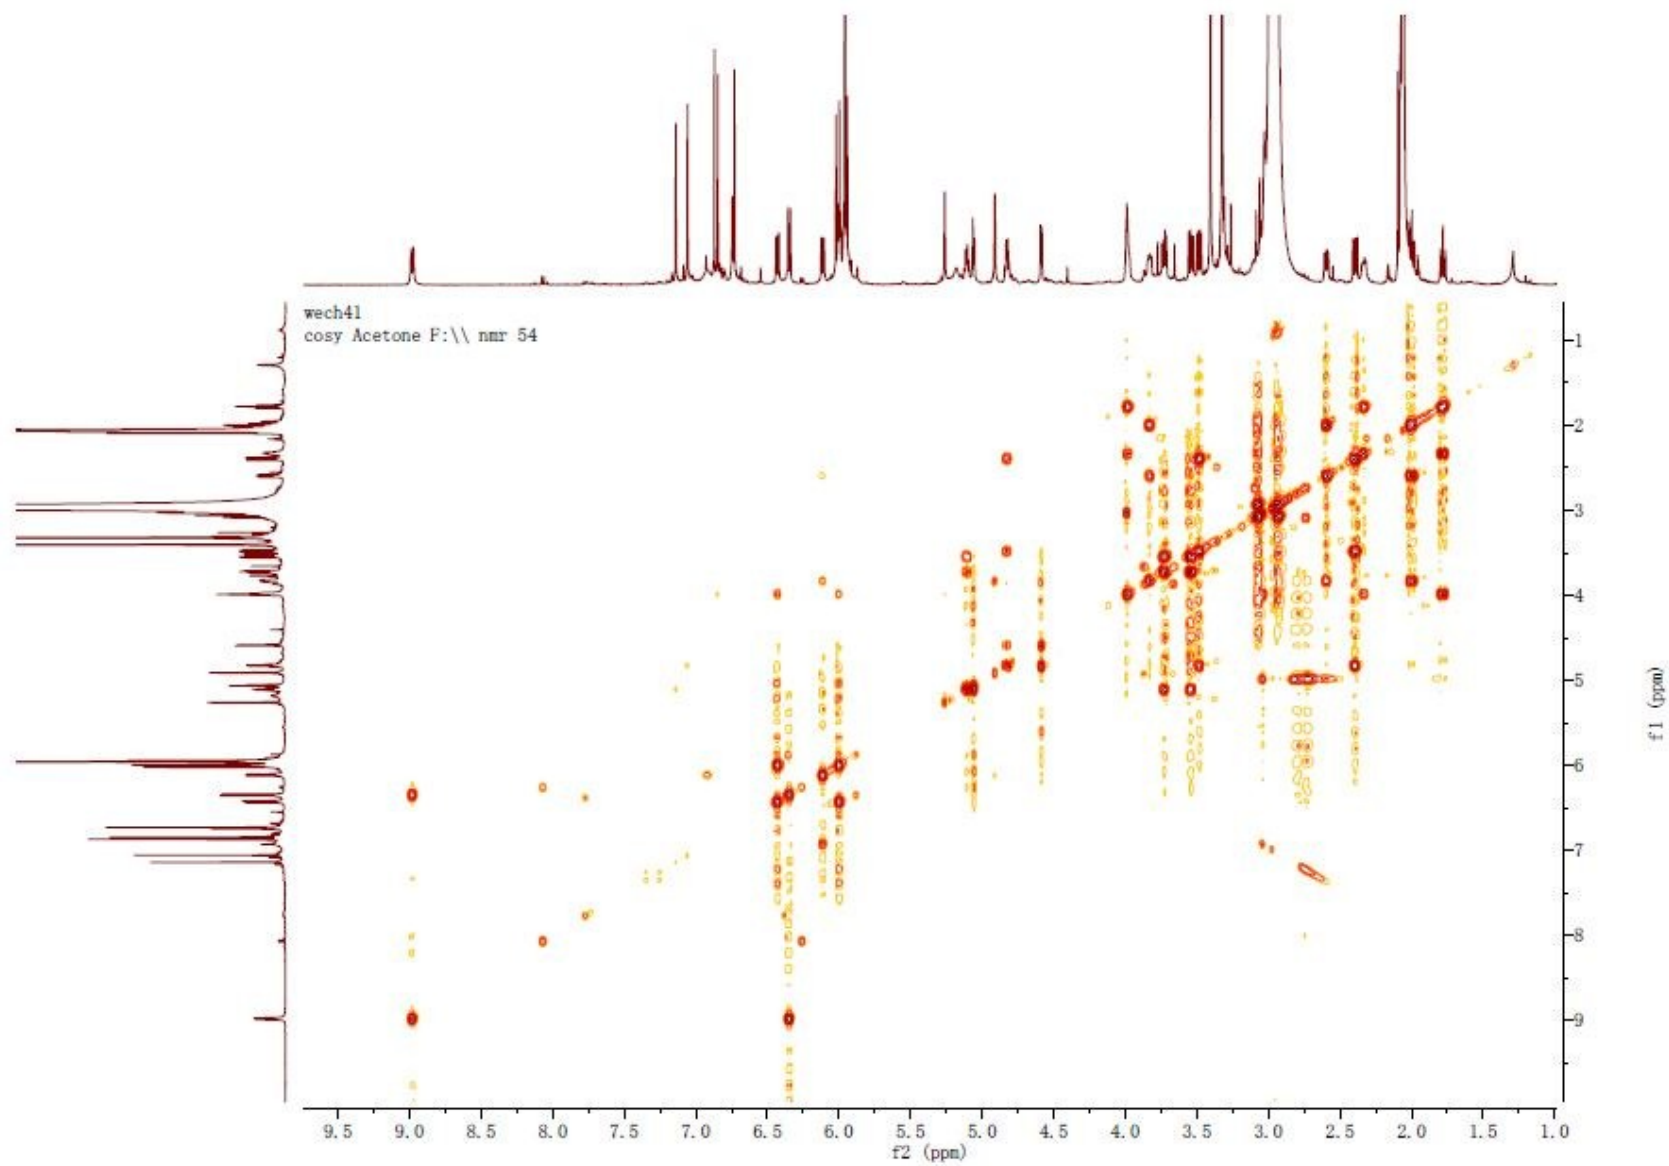

**Figure S29.** ROESY spectrum of erythrivarine G (**5**)

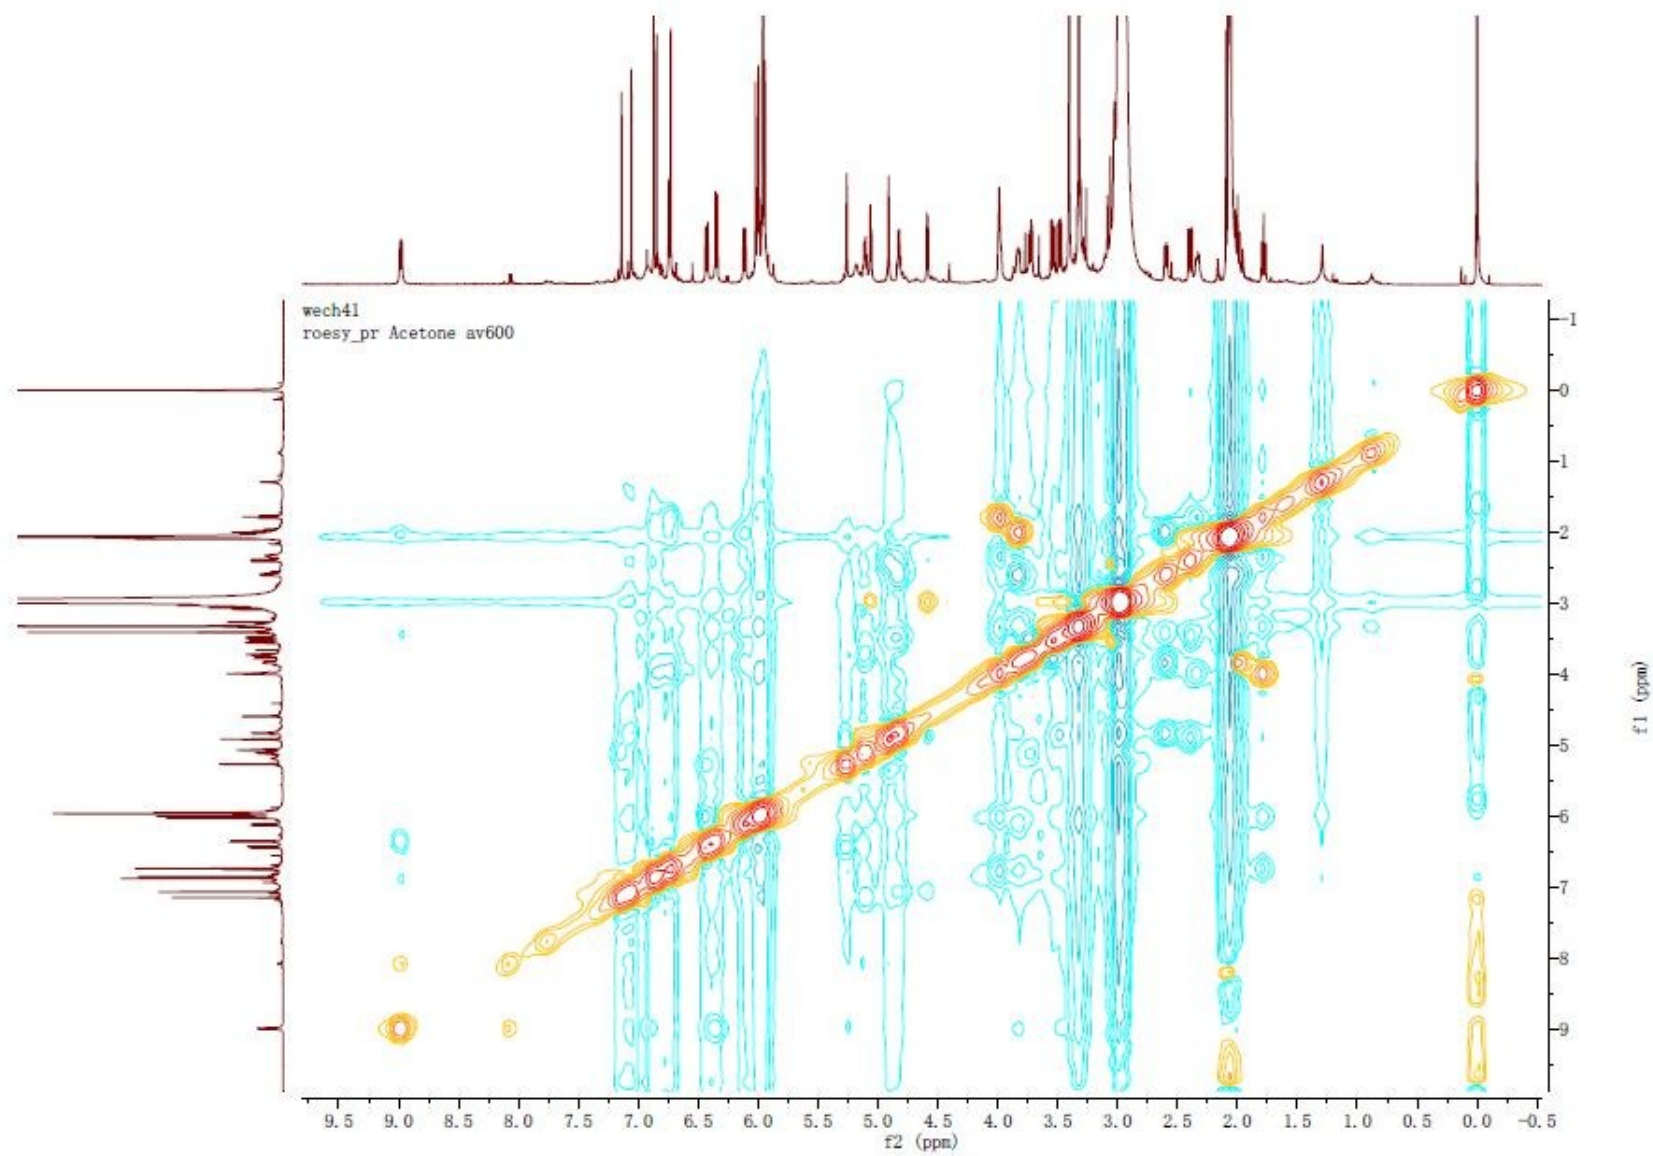



4、NMR spectroscopic data of erythrinine (6) and 8-oxo-erythrinine (7)

**Figure S30:** <sup>1</sup>H NMR spectrum of erythrinine (6)

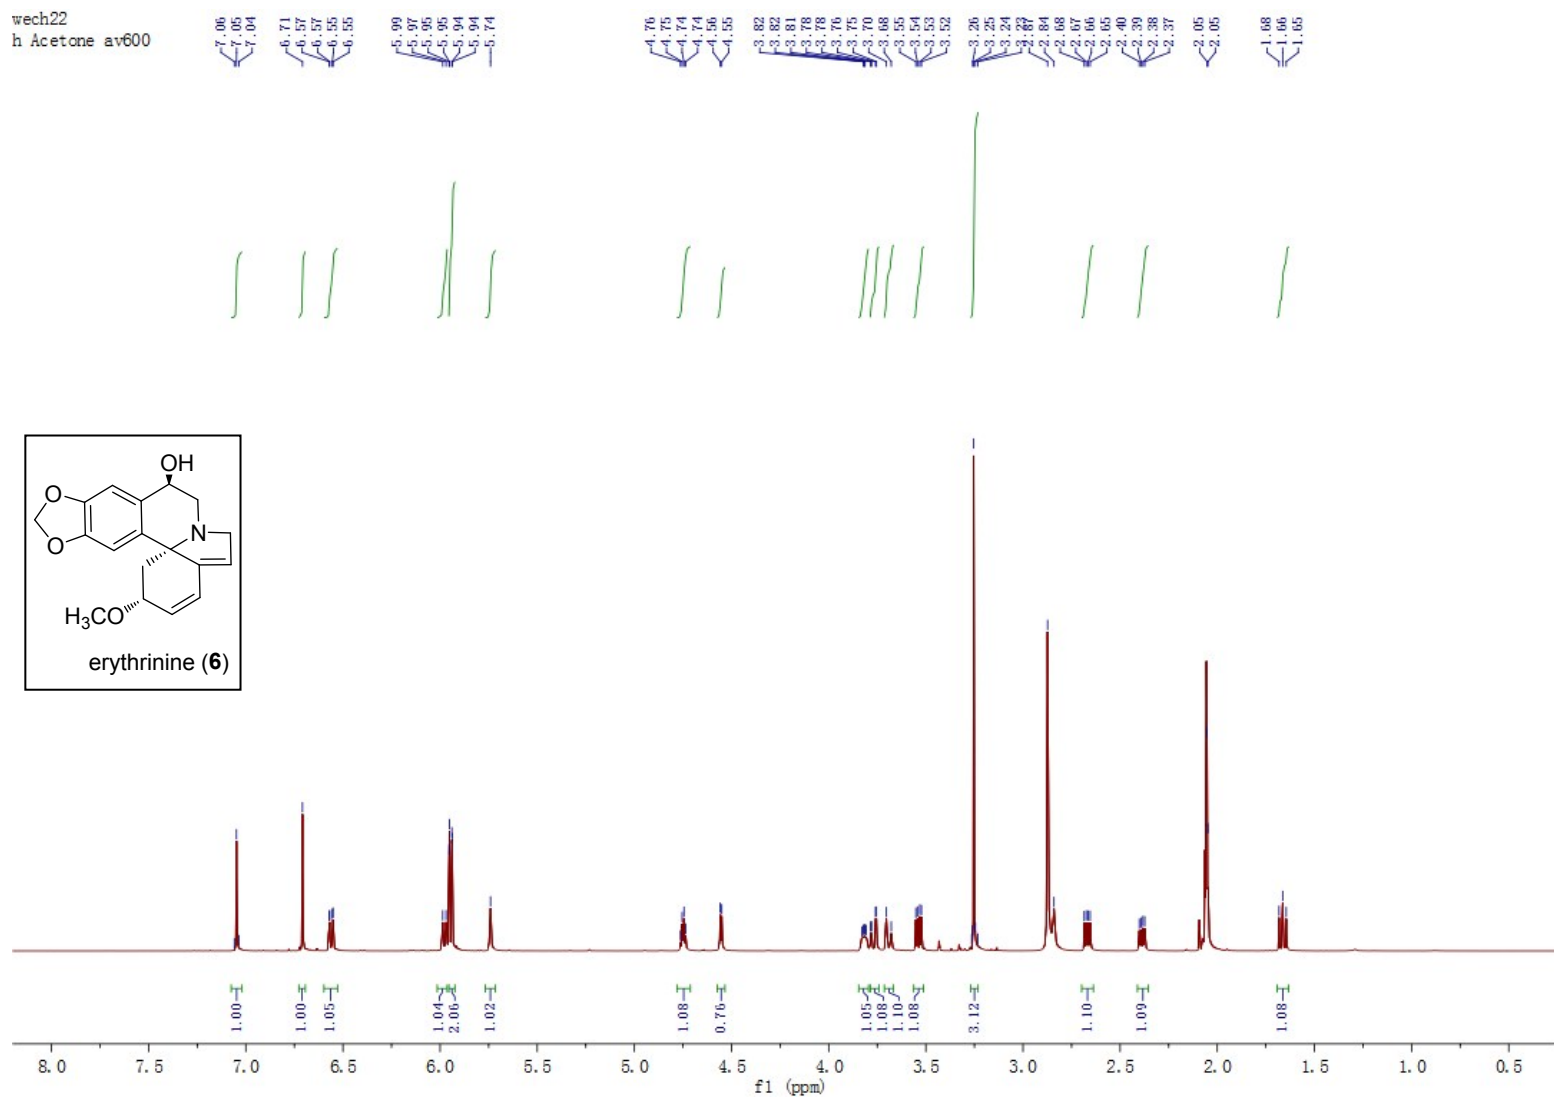

**Figure S31:**  $^{13}\text{C}$  NMR spectrum of erythrine (6)

wech22

d135 Acetone D:\ nmr 2

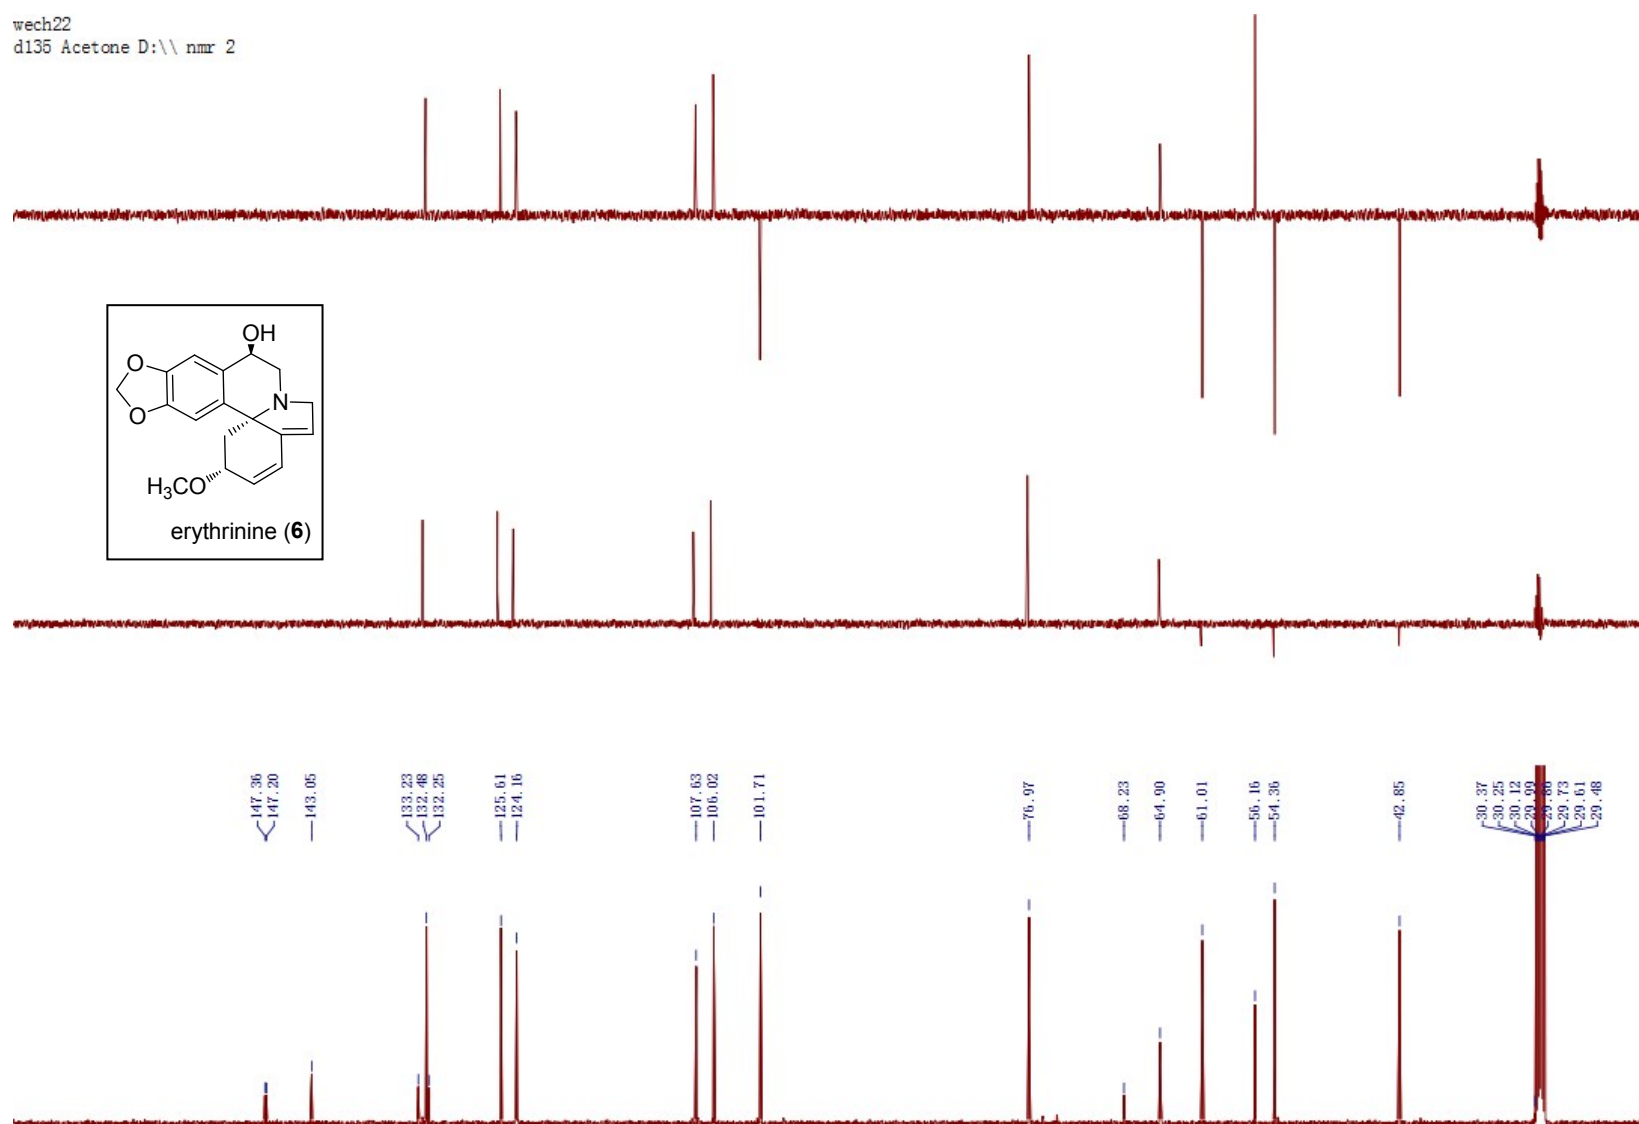

**Figure S32:**  $^1\text{H}$  NMR spectrum of 8-oxo-erythrinine (7)

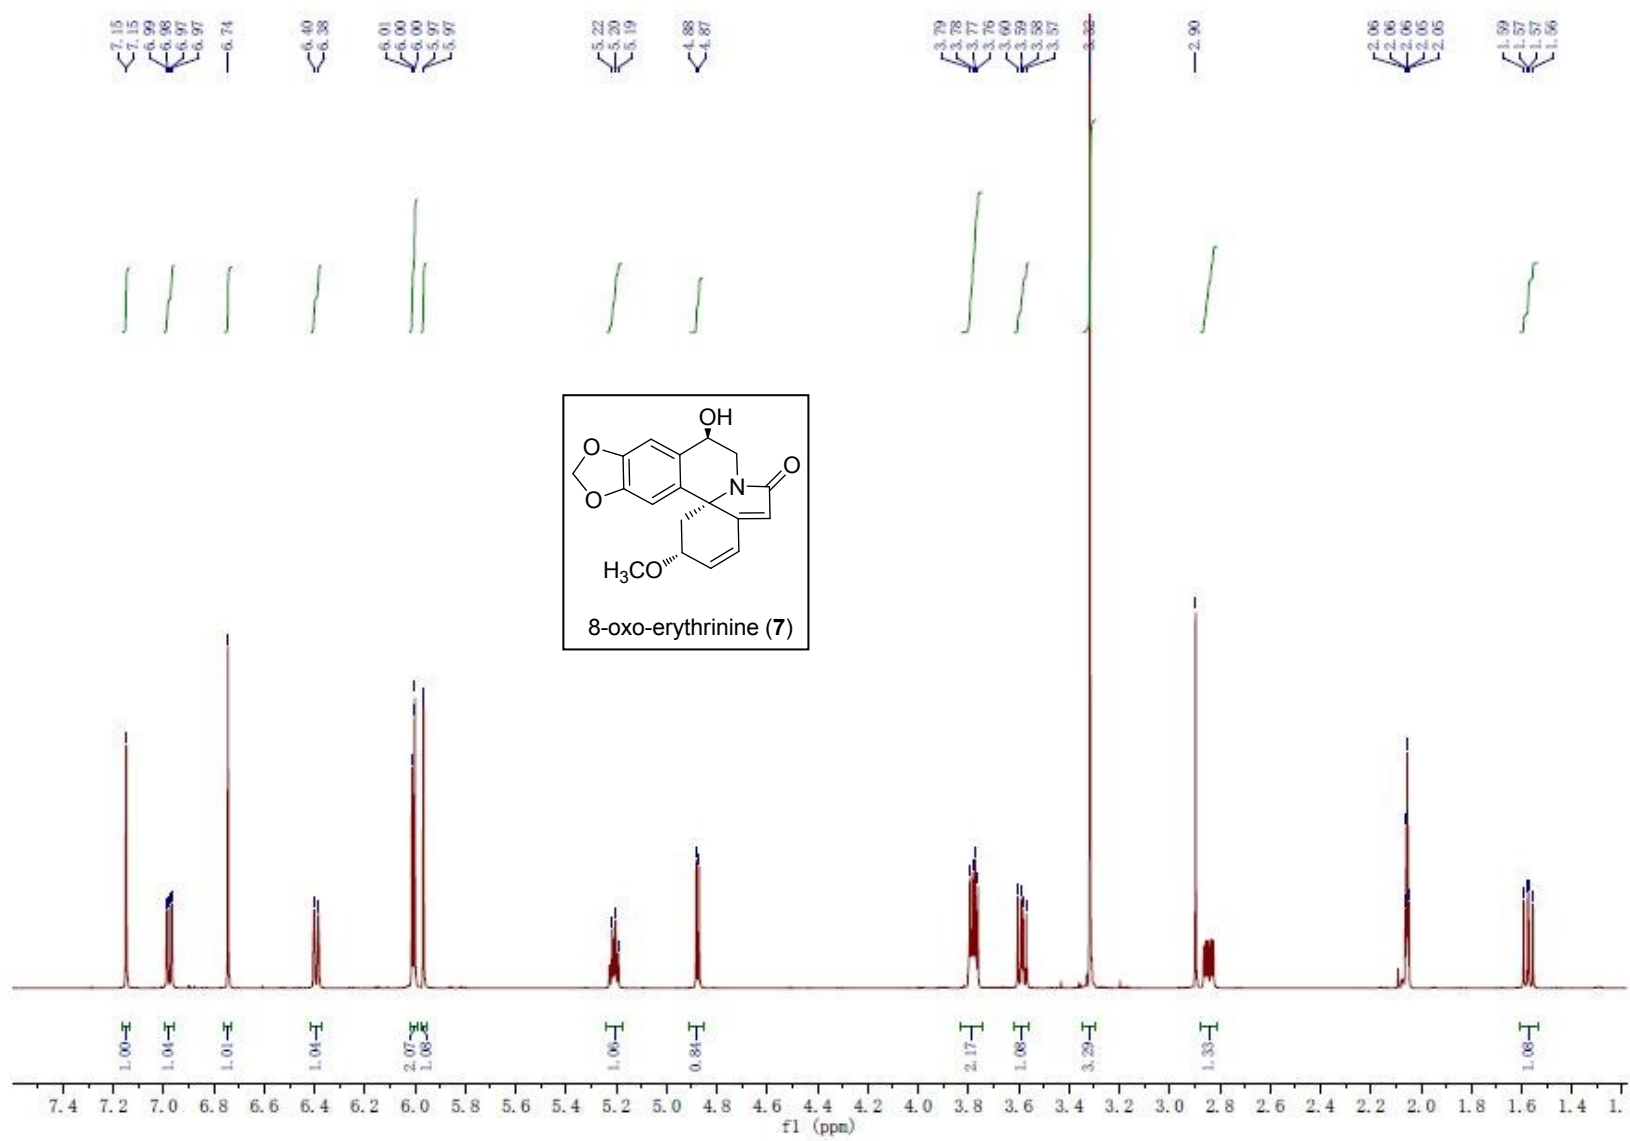

**Figure S33.**  $^{13}\text{C}$  NMR spectrum of 8-oxo-erythrinine (7)

wechl1  
d135 Acetone D:\ nmr 52

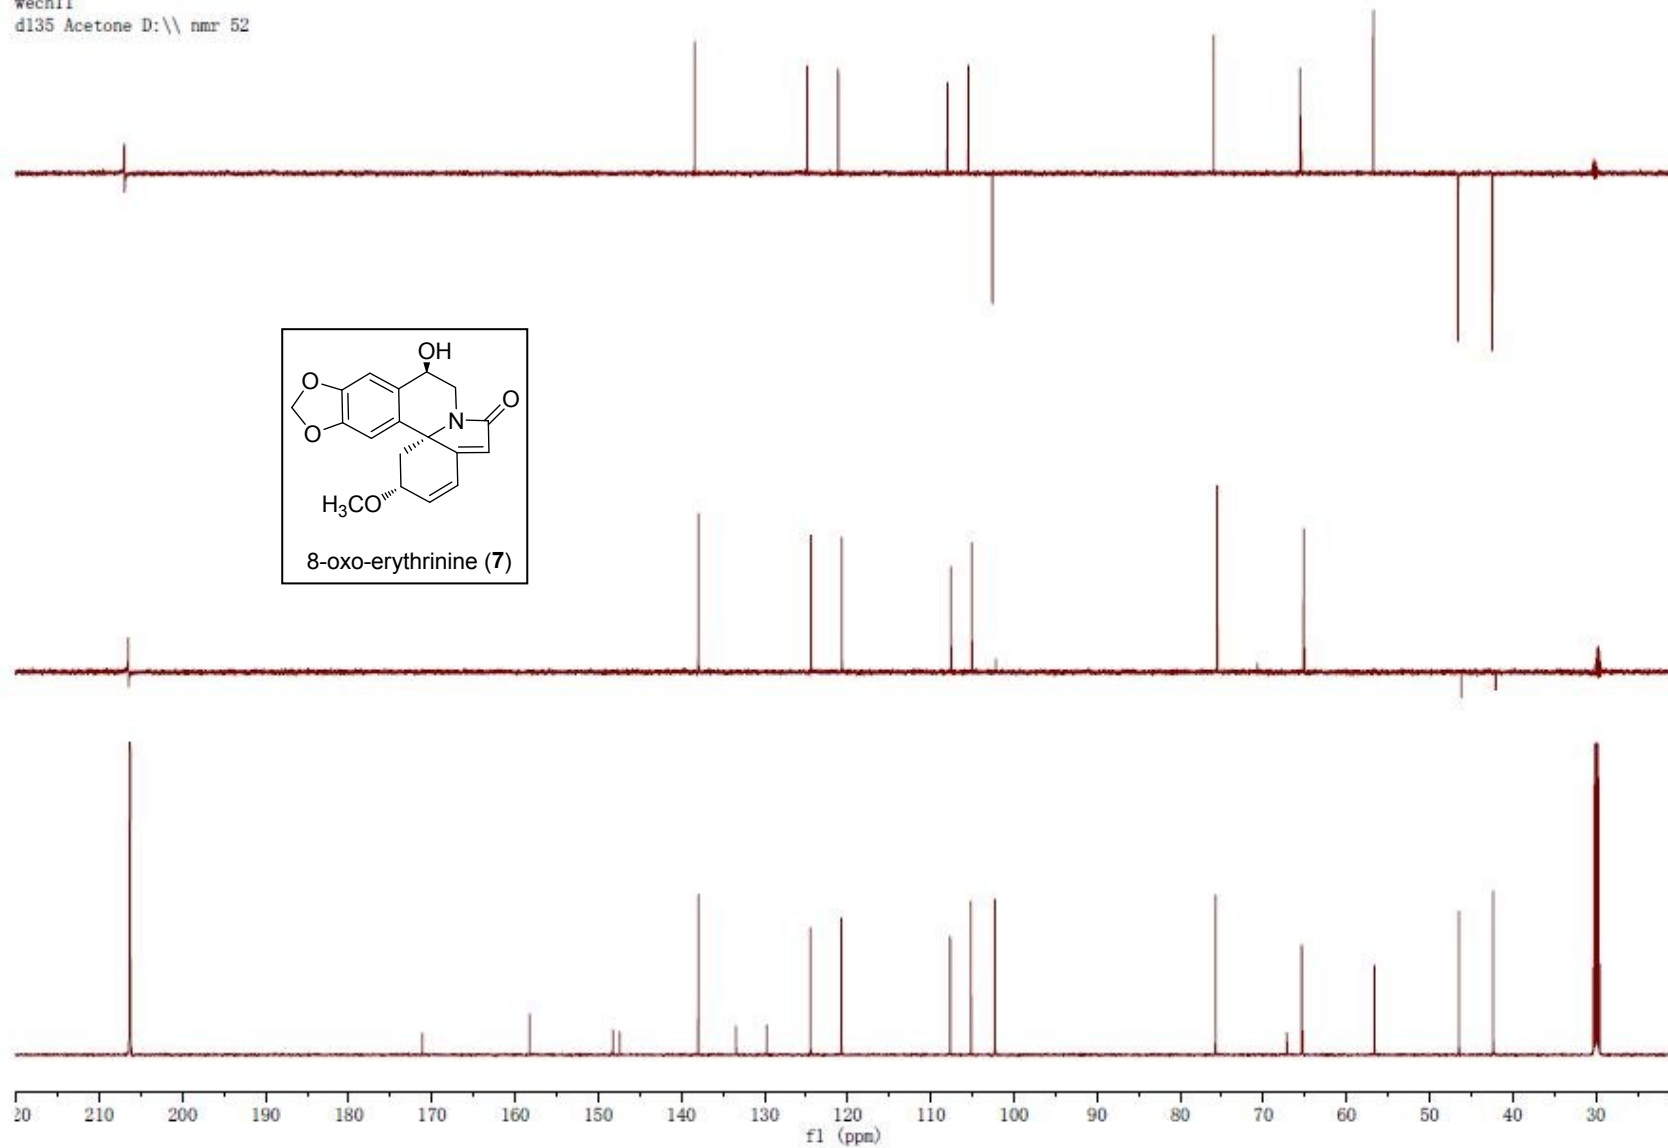

## 5、 UPLC-MS-MS analysis of the polymeric alkaloids

### Preparation of reference solution

The purified compounds were accurately weighed and further dissolved in methanol respectively to yield the stock solutions at the concentration of 5000 ng/mL, the equal volumes of stock solutions were then mixed well to yield the reference solution containing the compounds at the concentration of 1000 ng/mL.

### Preparation of sample solution

The total alkaloid extract was accurately weighed and dissolved in methanol to yield the sample solution at the concentration of 1000  $\mu\text{g/mL}$ .

### UPLC conditions

UPLC analyses were performed on a Waters Acquity H CLASS system; the compounds were analyzed by an Acquity UPLC BEH C18 column (2.1  $\times$  50 mm, 1.7  $\mu\text{m}$ , Serial NO. 021132332157 96) using ACN-H<sub>2</sub>O (10 % ACN – 100 % ACN in 1.5 mins, linear mode) as eluent.

### MS conditions

MS analyses were performed on a Waters Xevo TQD ESI-MS instrument. The compounds were analyzed using the MRM mode. The parameters (Cone voltage and collision energy) were tuned respectively for each compound (Table S1).

**Table S1:** The parameters for MS/MS analysis

|   | Compound        | Parent (m/z) | Daughter (m/z) | Dwell (s) | Cone (V) | Collision (V) |
|---|-----------------|--------------|----------------|-----------|----------|---------------|
| 1 | Erythrivarine C | 843.3856     | 262.0836       | 0.063     | 42       | 66            |
| 2 | Erythrivarine D | 857.3374     | 466.0262       | 0.063     | 42       | 36            |
| 3 | Erythrivarine E | 949.7628     | 311.9421       | 0.063     | 60       | 30            |
| 4 | Erythrivarine F | 964.5174     | 280.0855       | 0.063     | 56       | 44            |
| 5 | Erythrivarine G | 948.4223     | 262.0193       | 0.063     | 50       | 50            |

**Figure S34.** The characteristic peak obtained by ESI-MS-MS of erythrivarine C (1)

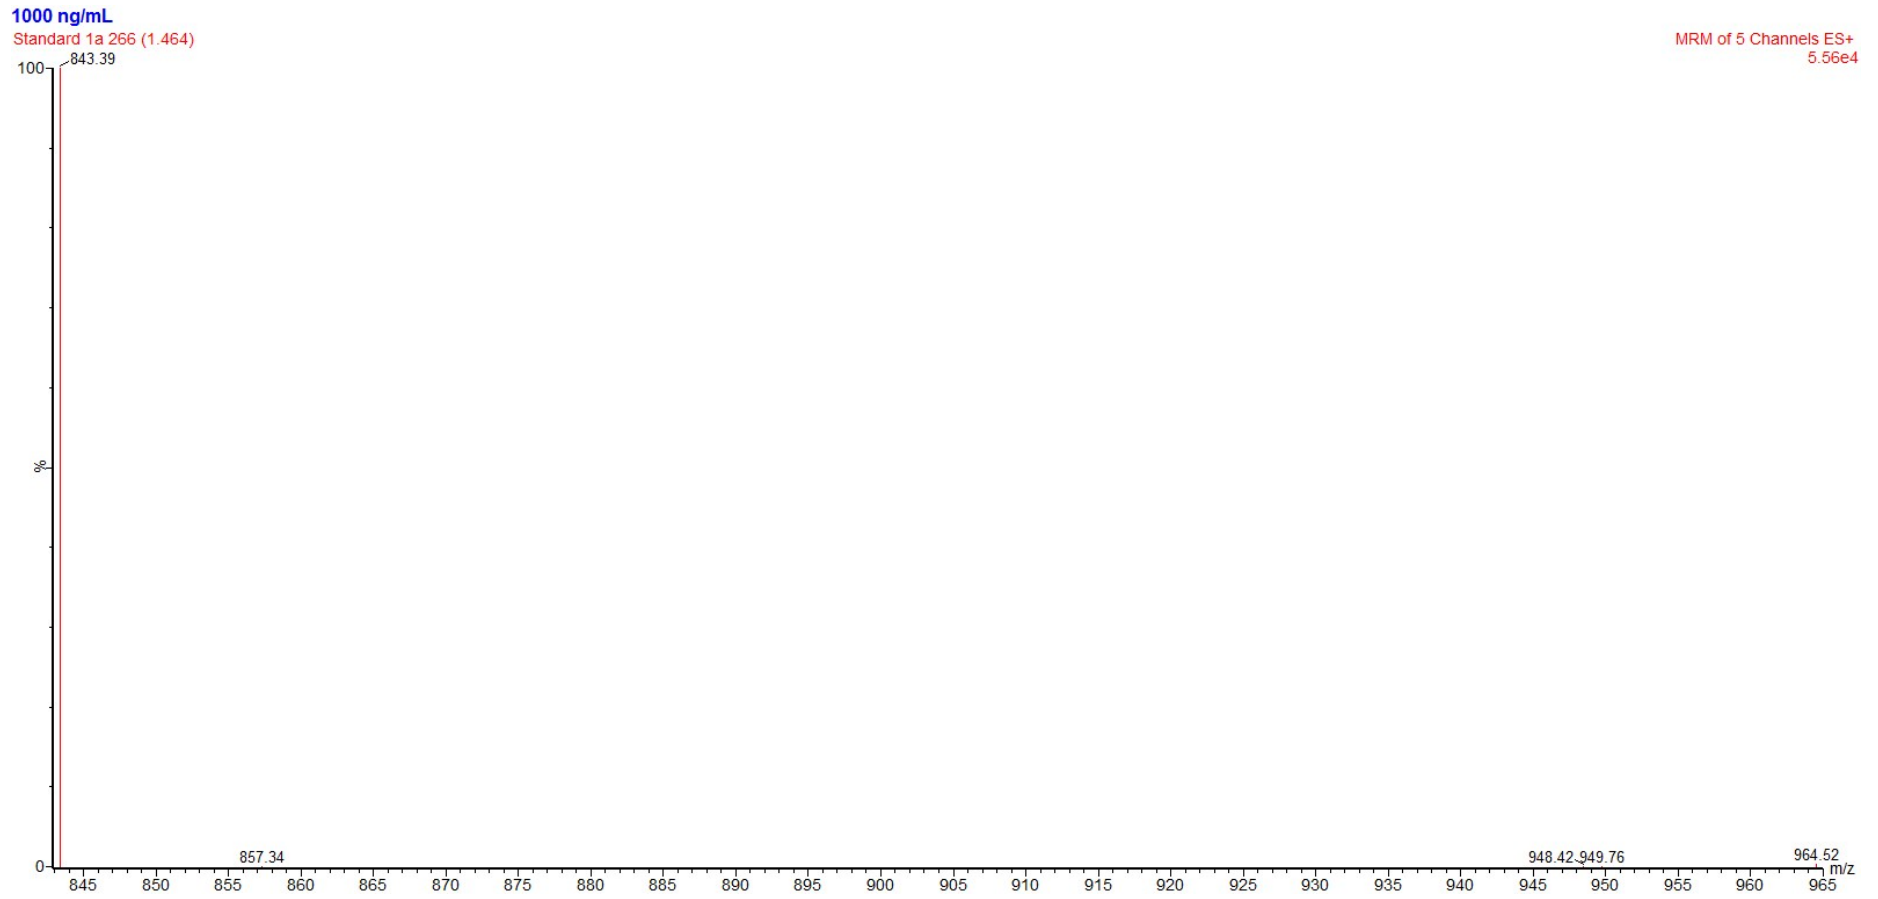



Sample 1 265 (1.458)

MRM of 5 Channels ES+  
3.83e3

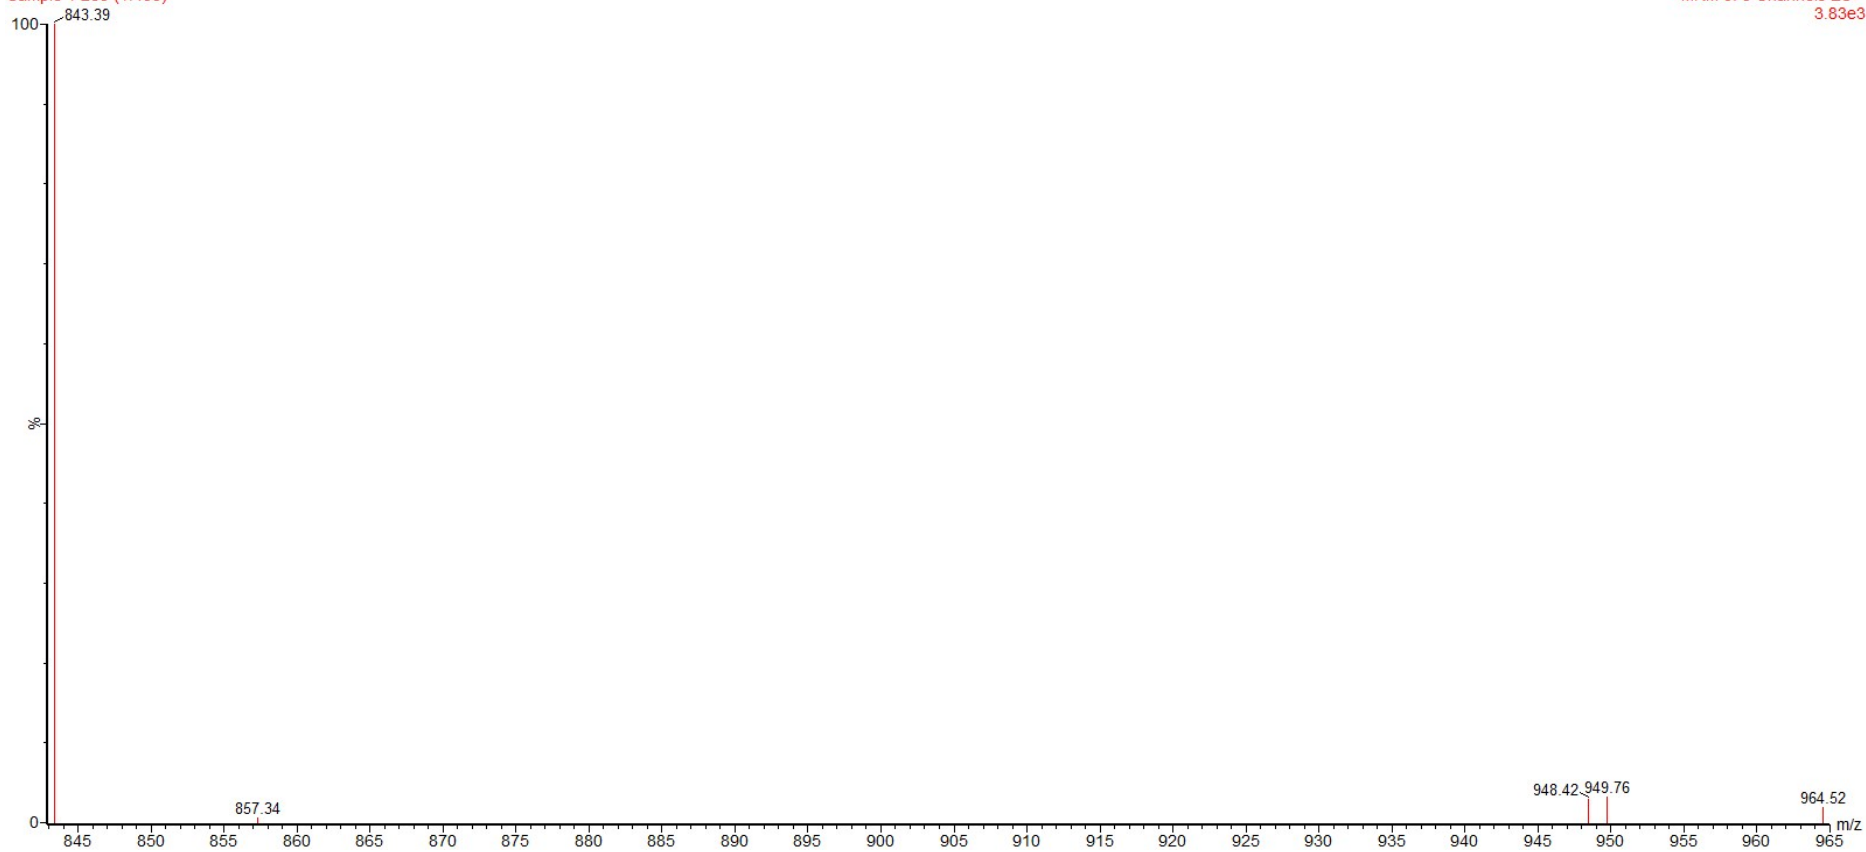

**Figure S35.** The characteristic peak obtained by ESI-MS-MS of erythrivarine D (2)

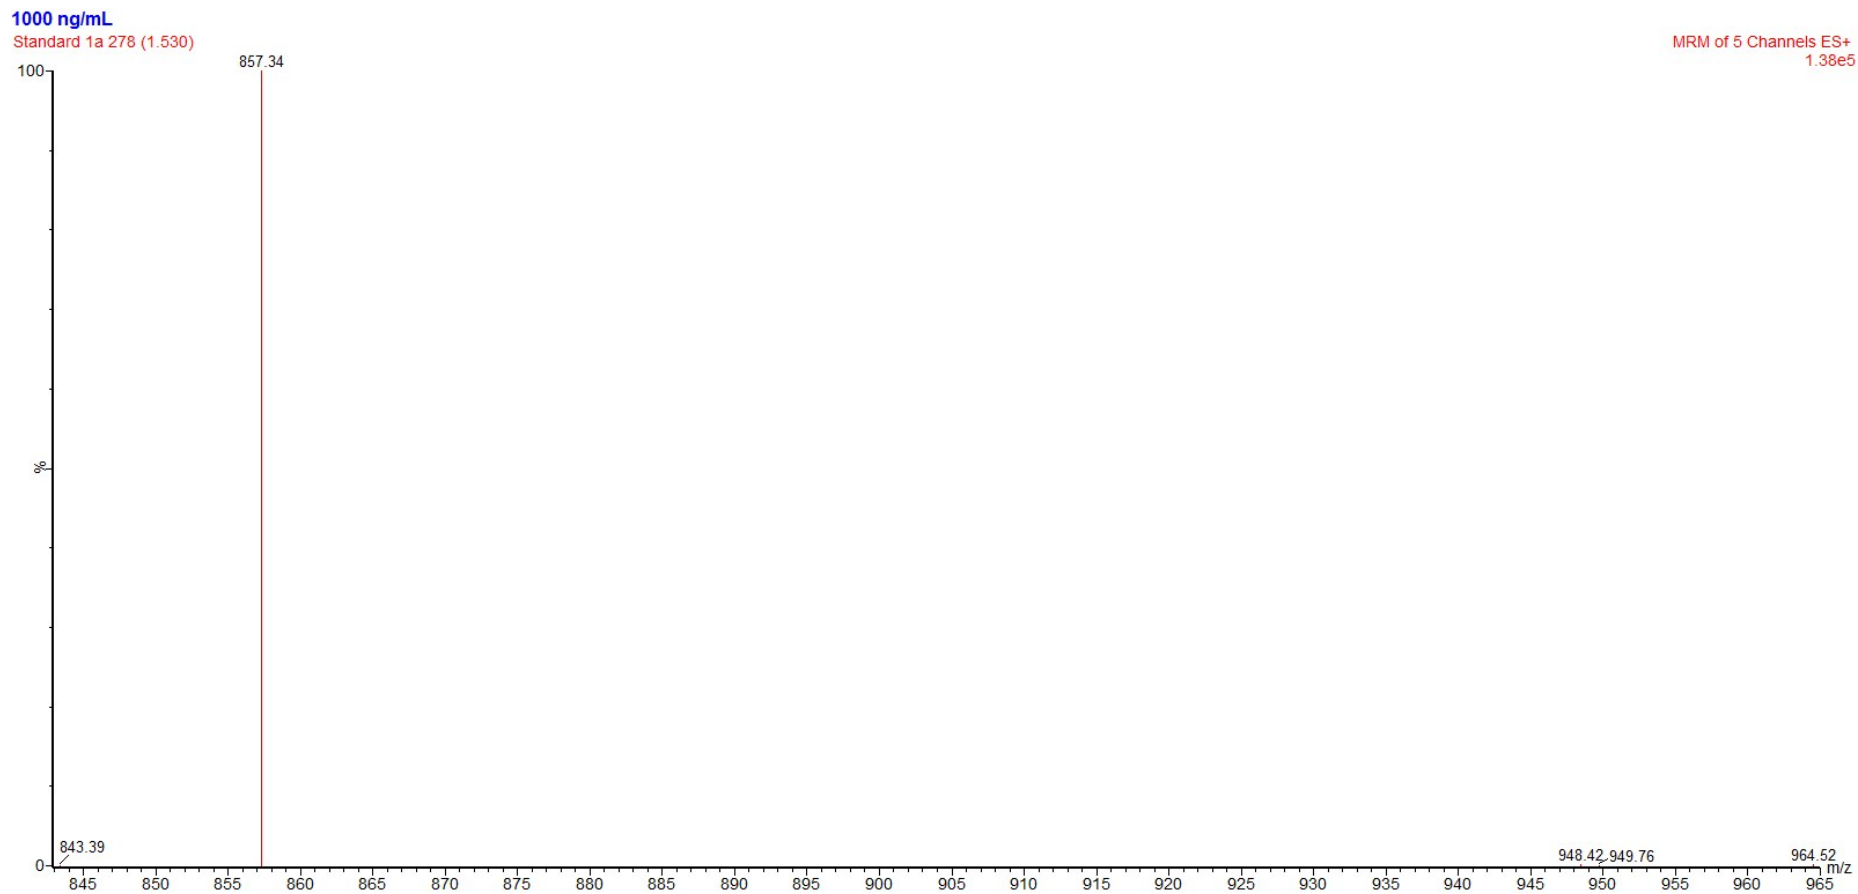

Sample 1 277 (1.524)

MRM of 5 Channels ES+  
3.02e3

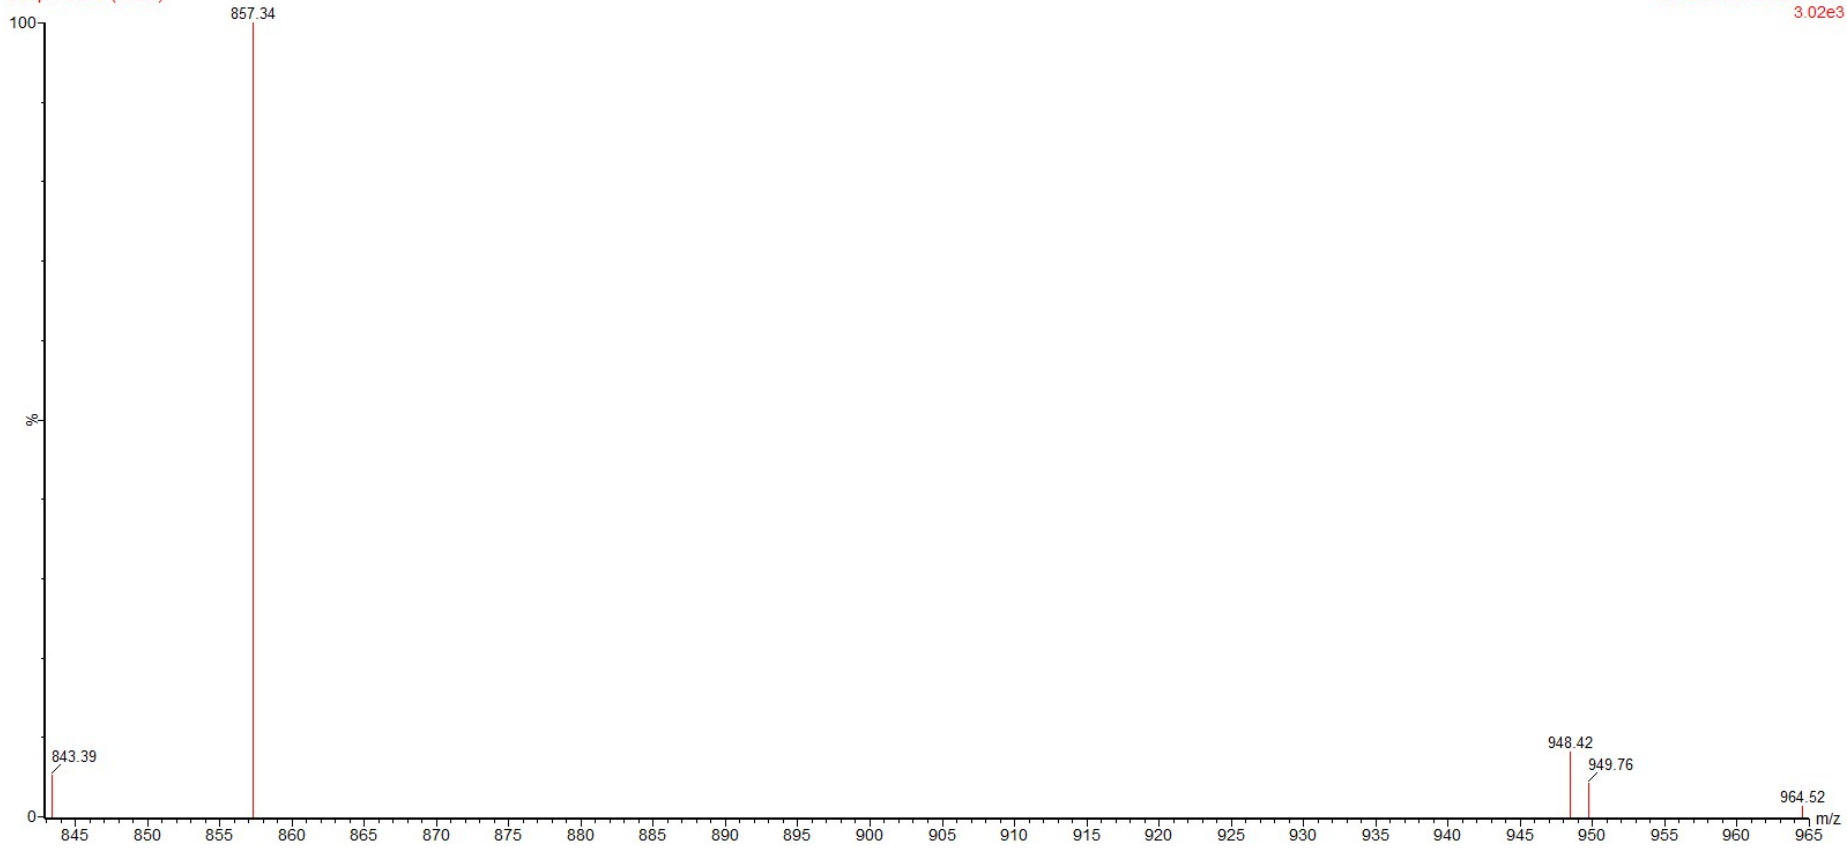

**Figure S36** The characteristic peak obtained by ESI-MS-MS of erythrivarine E (3)

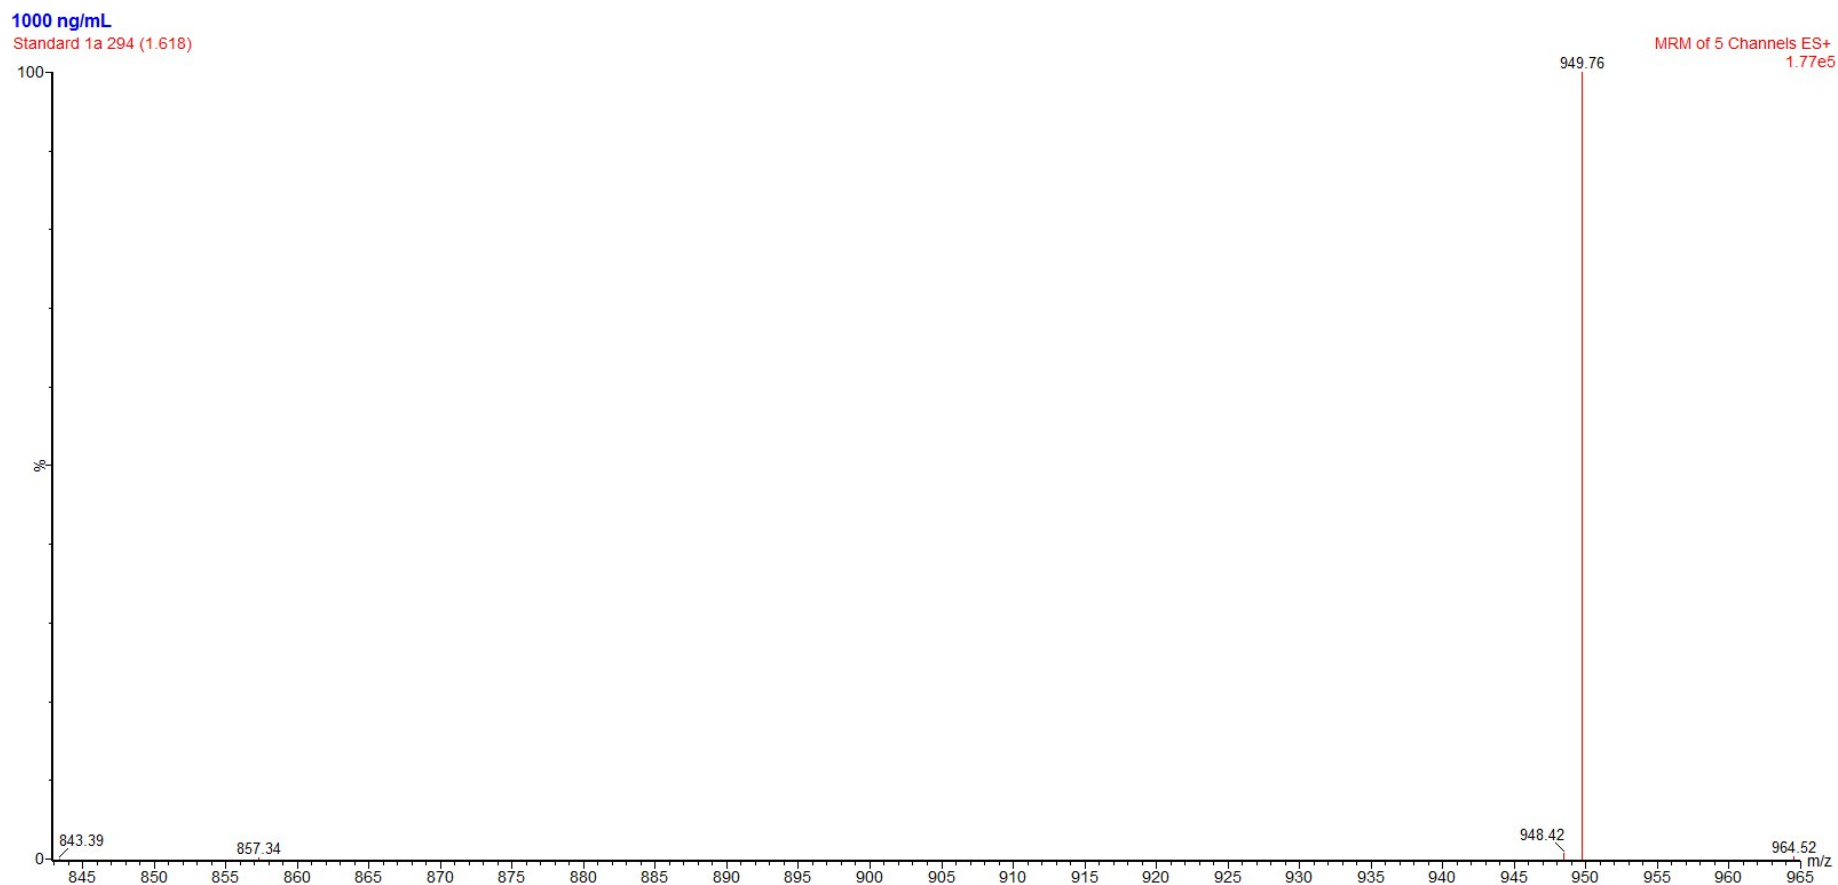

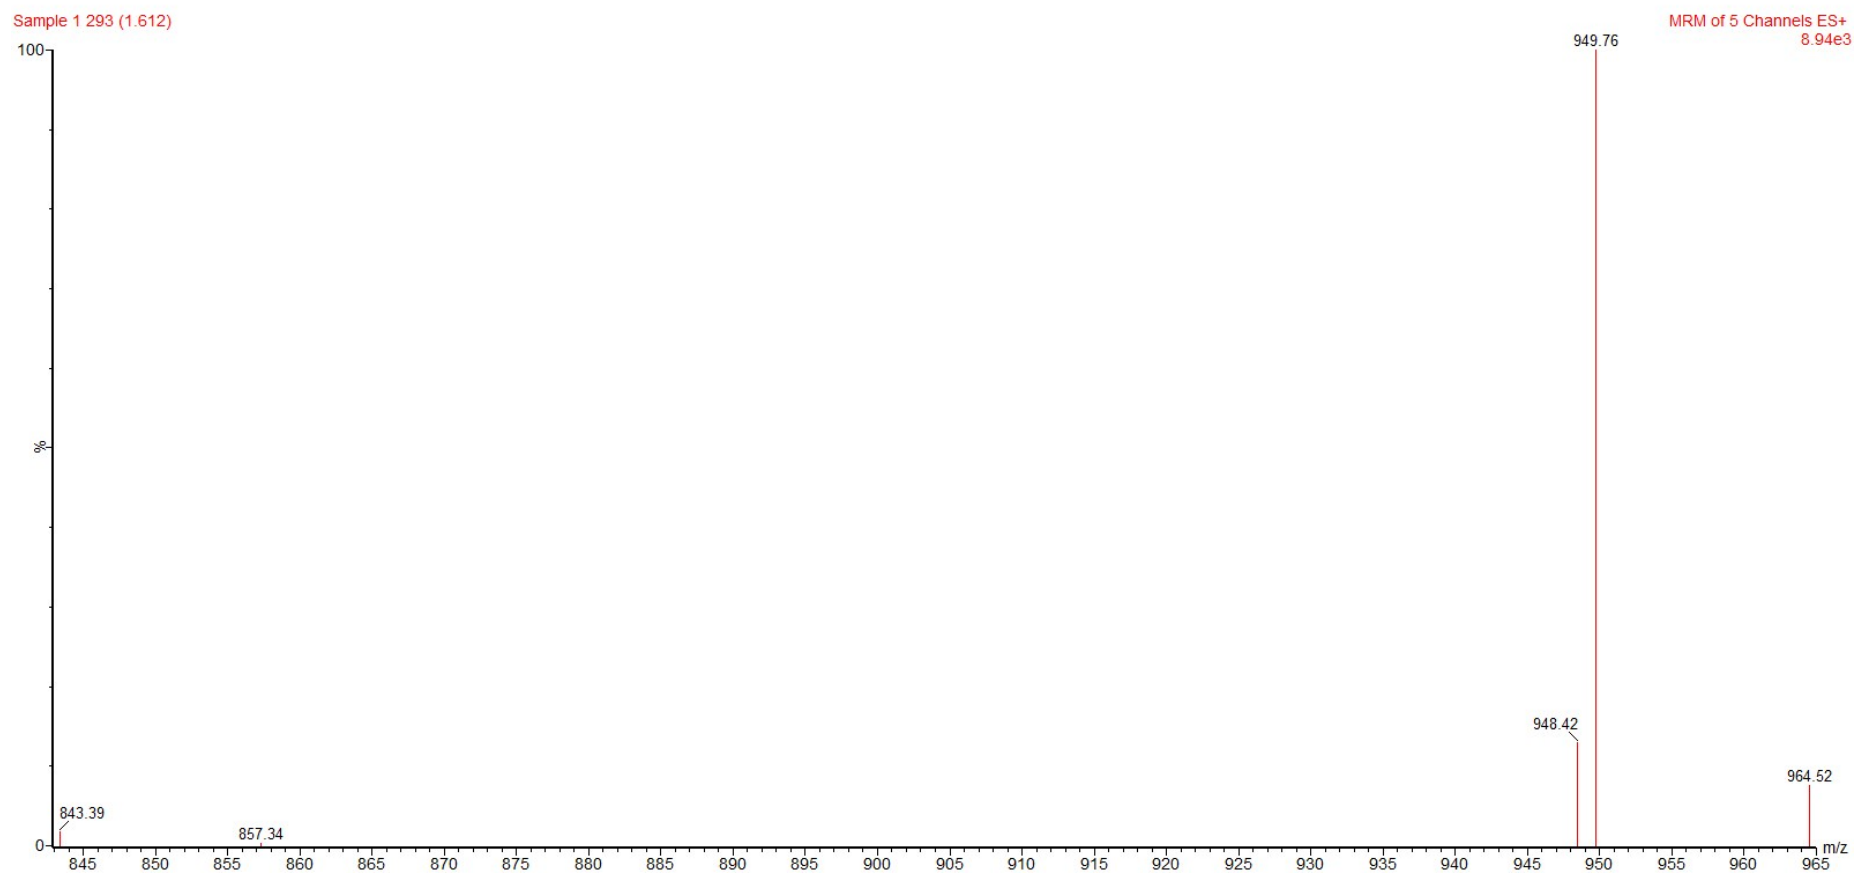

**Figure S37.** The characteristic peak obtained by ESI-MS-MS of erythrivarine F (4)

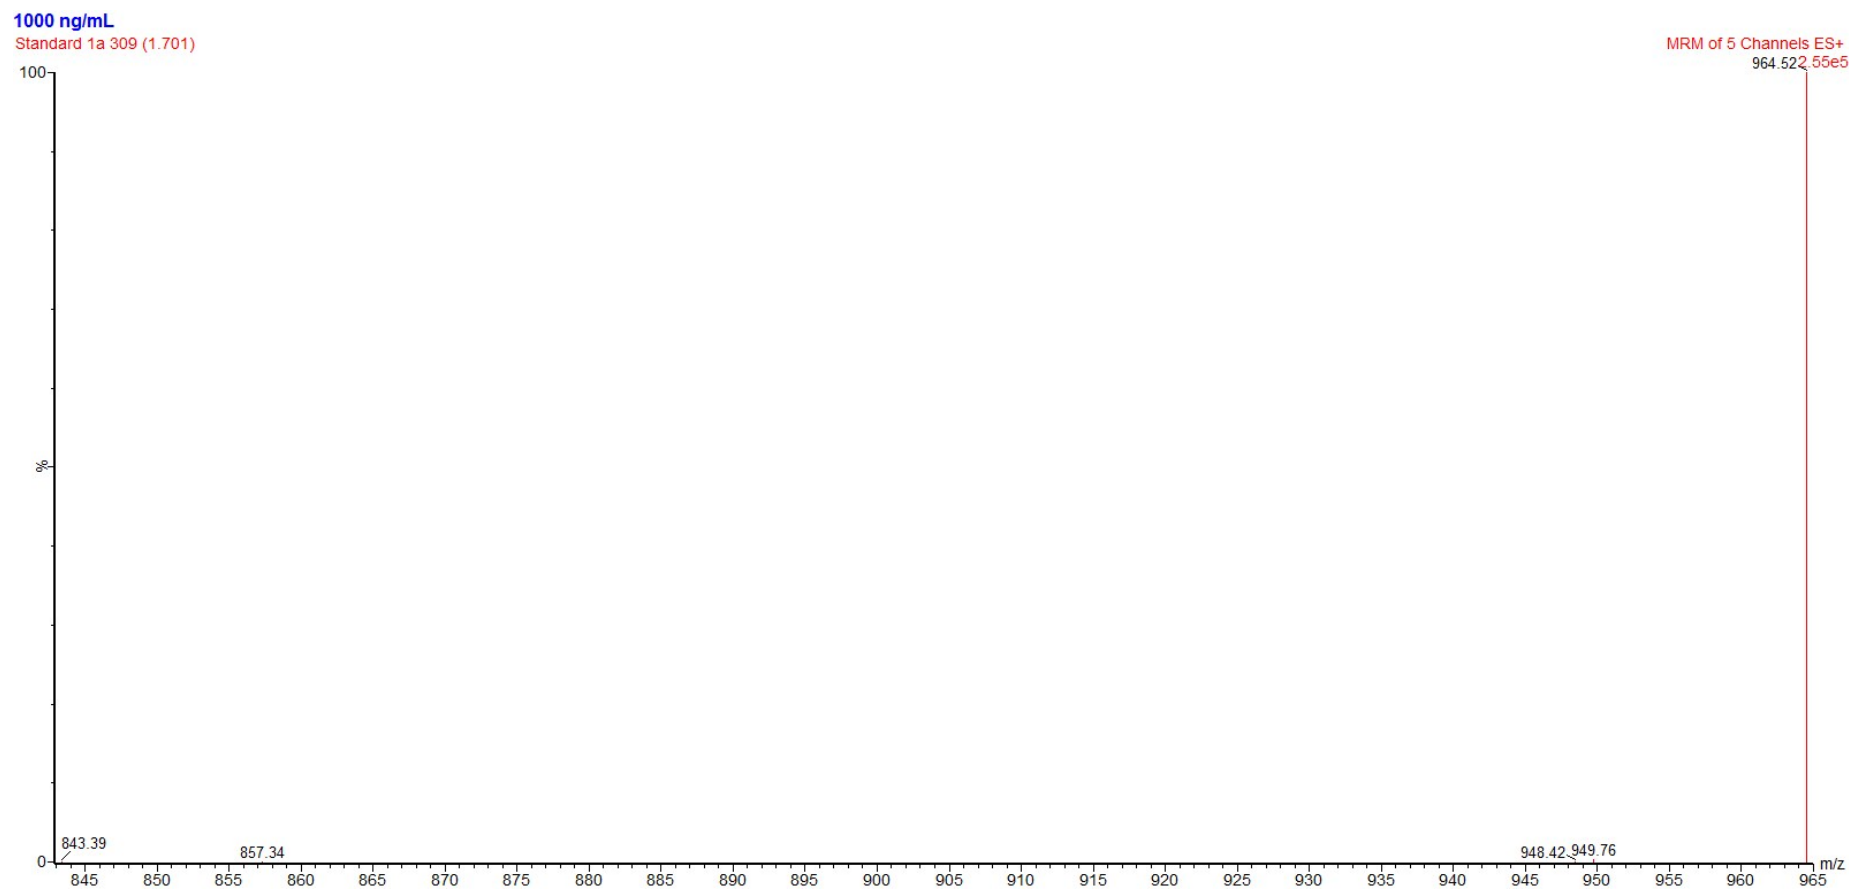



Sample 1 308 (1.695)

MRM of 5 Channels ES+  
964.521.03e4

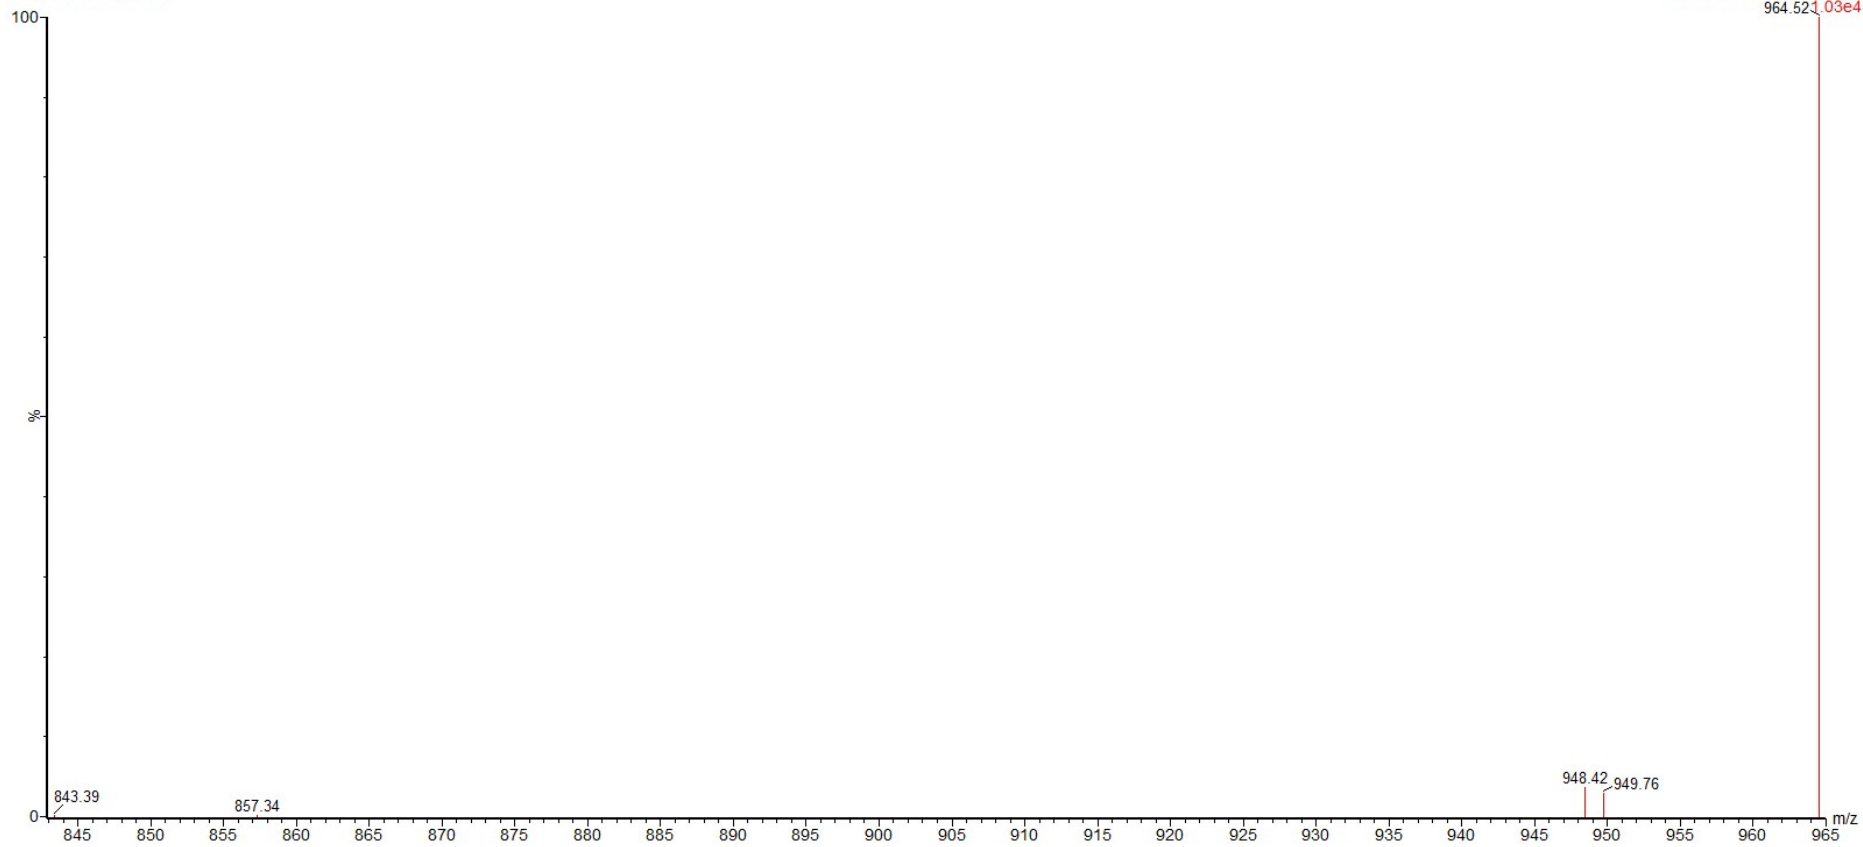

**Figure S38.** The characteristic peak obtained by ESI-MS-MS of erythrivarine G (5)

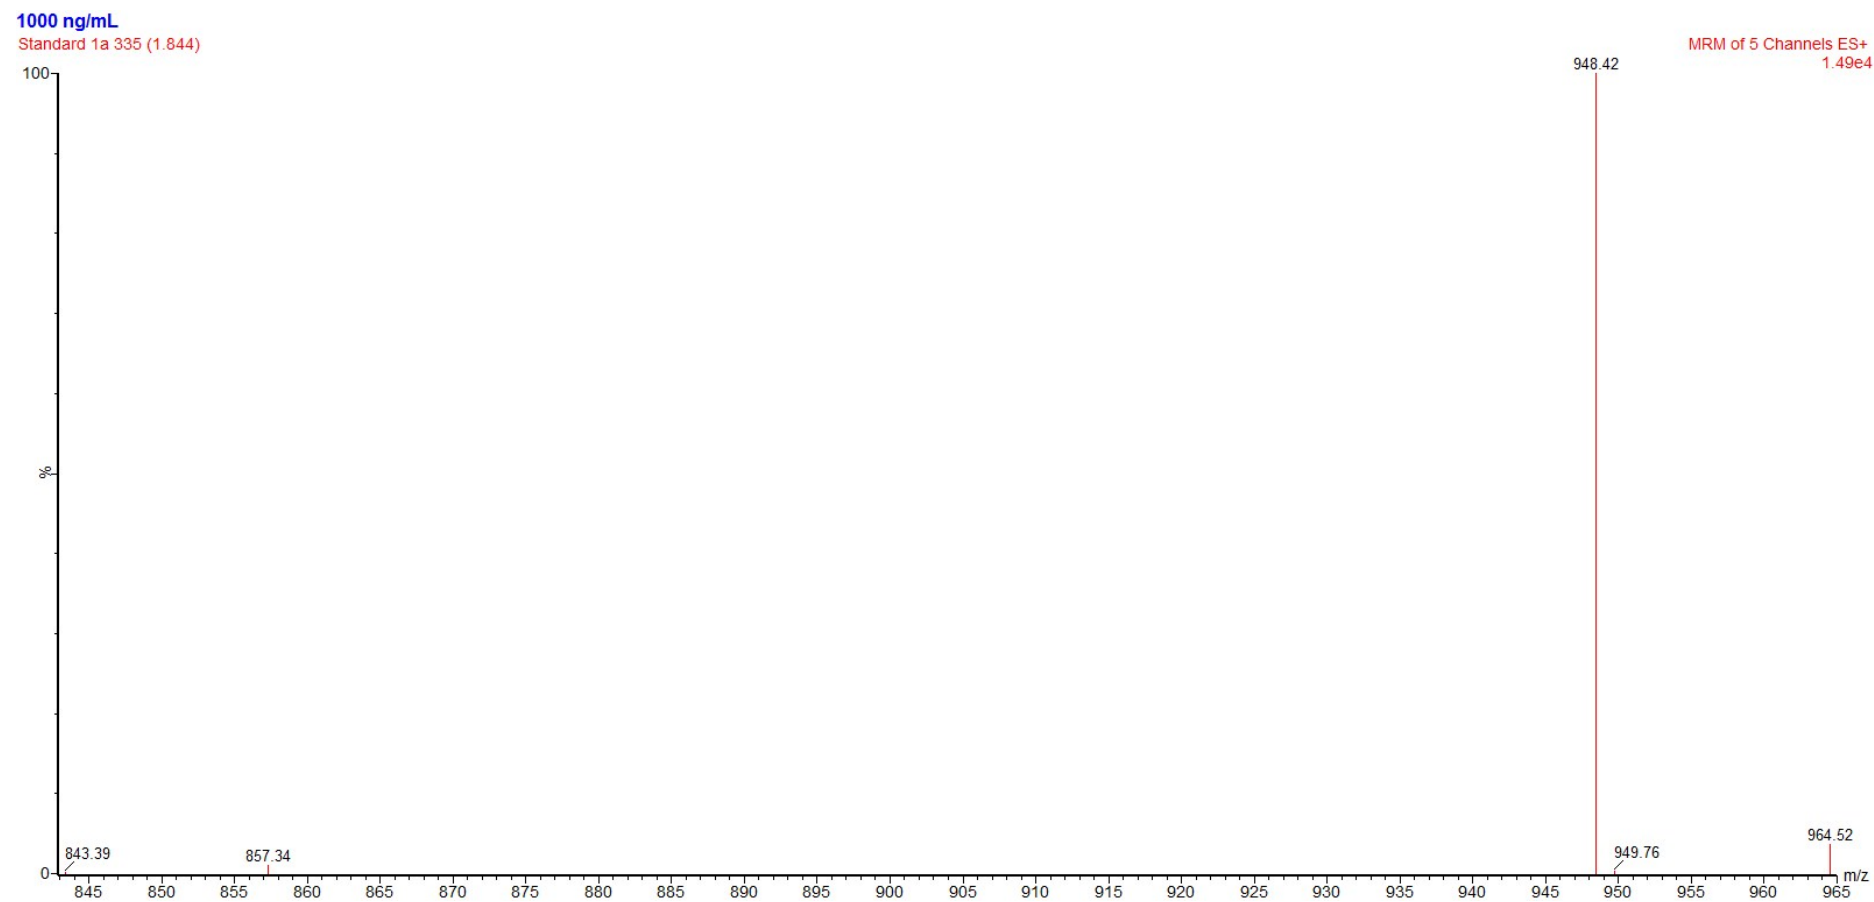

Sample 1 331 (1.821)

MRM of 5 Channels ES+  
2.09e3

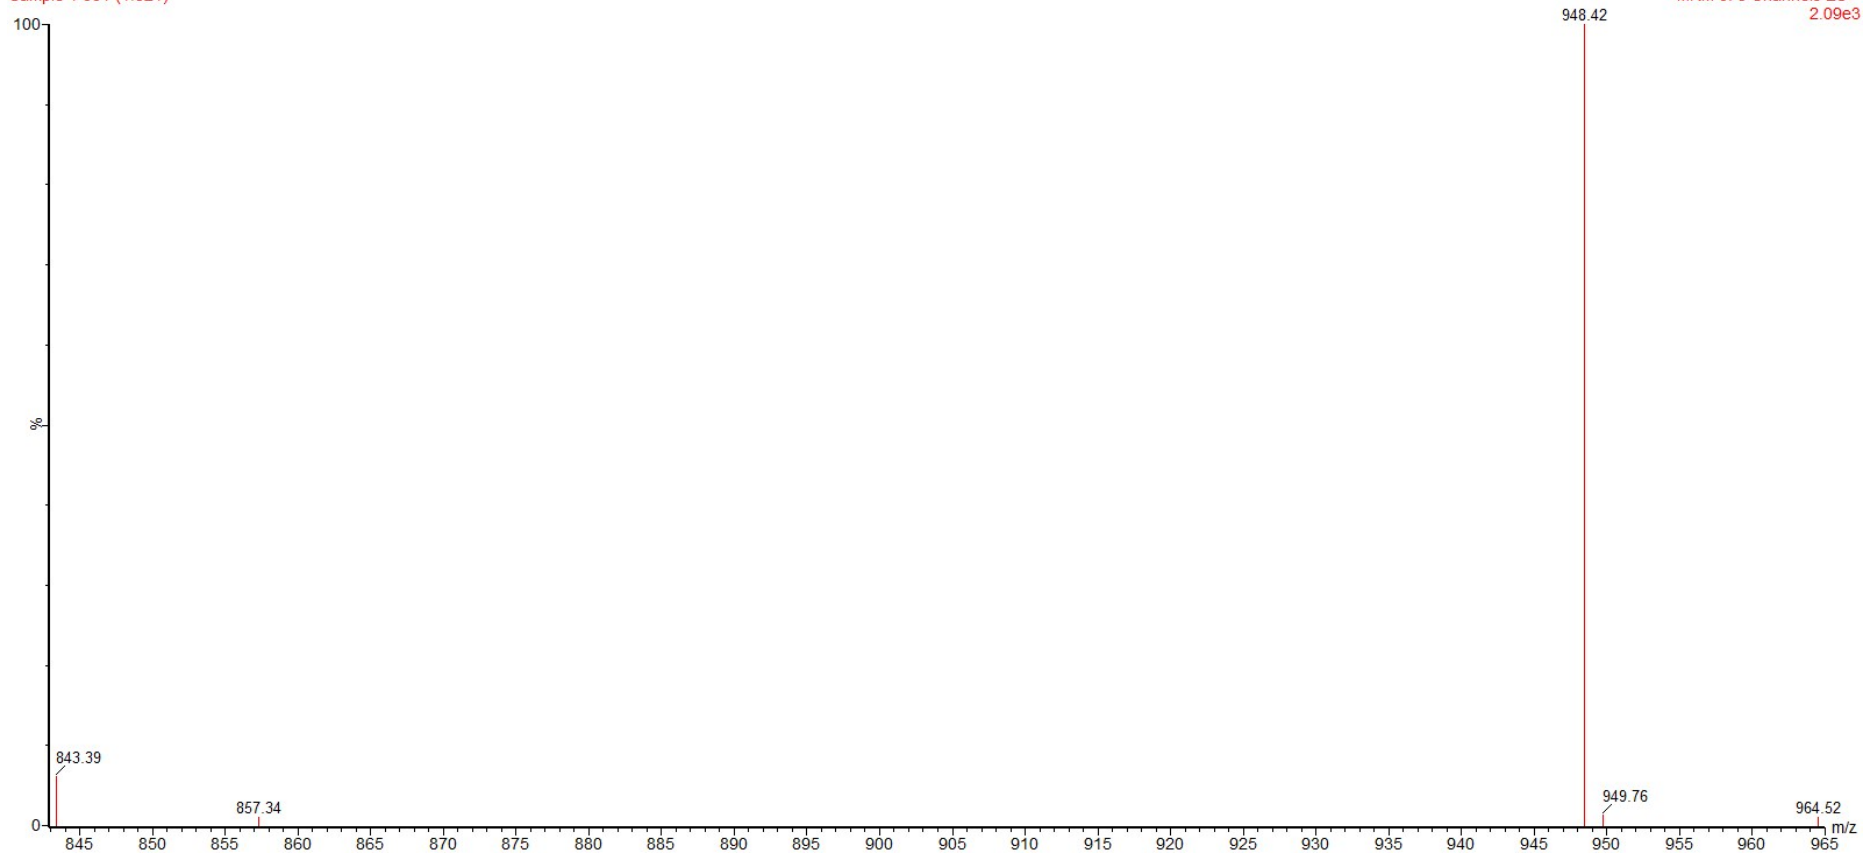

## 6、The CD and UV chromatography of the unit of erythrivarine C (1)

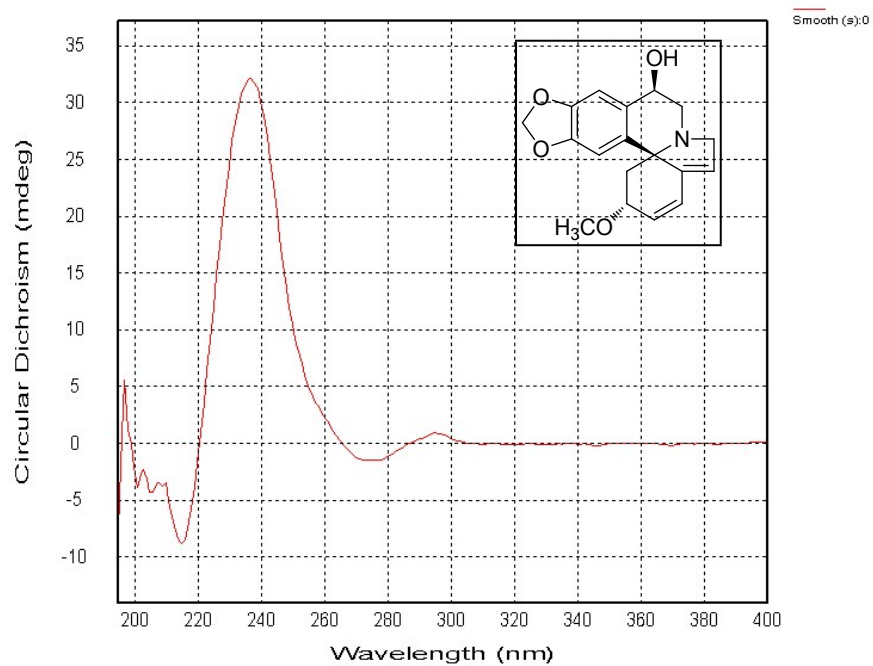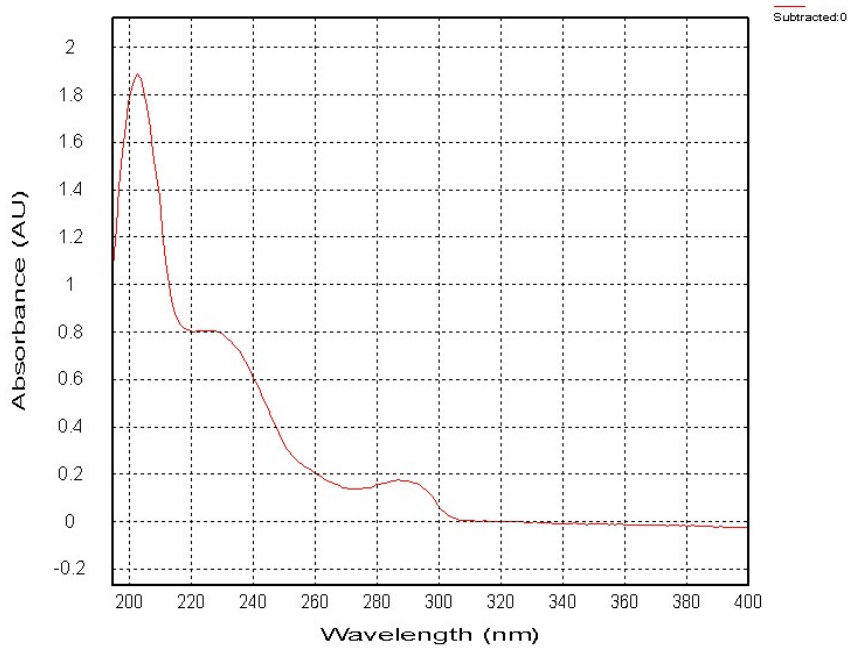

Supplement: c6ra20530e1.pdf [file c6ra20530e1.pdf]
